# Supplementary material
Source: Research Square preprint supplement (doi:10.21203/rs.3.rs-8826117/v1)
Supplement: Supplementary file 1 [file 119f281ed090a55378945a43.xlsx]

## Sheet: Video Data Sheet
YouTube search terms	Video ID	Release Date	Video link	Video Title	Video Introduction	Video duration	View count	Number of likes	Number of comments	Publisher ID	Publisher Name	Publisher's Follower Count
Chinese traditional music	Lykgg5phVJE	2006-7-8	https://www.youtube.com/watch?v=Lykgg5phVJE	Blossoms on a Moonlit River in Spring | 春江花月夜	华韵群芳《春江花月夜》 古曲 秦鹏章 罗忠熔编曲 琵琶领奏：杨静 中国中央民族乐团 Ensmble "Blossoms on a Moonlit River in Spring" Ancient Tune Arranged by Qin Pengzhang & Luo Zhongrong Lead Pipa: Yang Jing China Central Chinese Orchestra	523	10074778	41883	3724	/@hacona	hacona	341000
Chinese classical music	PLa4aXxispc	2007-11-27	https://www.youtube.com/watch?v=PLa4aXxispc	Chinese classical music for zither guzheng solo 漢宮秋月by Liu Fang 劉芳	Guzheng is known as Chinese "zither" or harp, has over 2000 years of well-documented history. The title of this piece beautifully interpreted by Liu Fang is called "The autumn moon in the palace of a Han emperor" (Hangong Qiuyue 漢宮秋月), traditional piece from the Chinese classical repertoire, recorded live at Liu Fang's solo recital in the Pierre-mercurre Hall, Centre Pierre-Peladeau, Montreal, on…	114	100010	138	13	/@yinyueliufang	yinyue liufang	2,720
Chinese traditional music	GDiVQXz3bX0	2007-6-8	https://www.youtube.com/watch?v=GDiVQXz3bX0	Chinese traditional music - 霸王卸甲, Liu Fang pipa solo 劉芳	Liu Fang's unique style of interpretation of this ancient classical piece has been highly acclaimed internationally. This current video clip is an extract of 6 minutes. The complete version is about 11 minutes and can be found in http://www.myspace.com/liufang. This is one of the most famous master pieces from the traditional pipa repertoire, know as "wu qu" (martial style) as constrast to "wen q…	310	100493	240	22	/@moremusicale	phil manage	2,090
Chinese traditional music	KxVbdGPAfjE	2008-2-27	https://www.youtube.com/watch?v=KxVbdGPAfjE	Beautiful China and traditional music	Have a look at our back yard!	349	1035780	1260	389	/@planetiger	baby john	224
Chinese traditional music	ujzMHLac404	2009-12-10	https://www.youtube.com/watch?v=ujzMHLac404	Guzheng: "Spring River Flower Moon Night" 古筝 - 春江花月夜	Guzheng Solo Performance "Spring River Flower Moon Night" 古筝 - 春江花月夜 Performed by Carol Chang from Sound of China Guzheng Ensemble This instrument is called "guzheng" or gu zheng. This is one of my favorite guzheng song. I hope you enjoy it as much as I do. Thank you for viewing! I played this clip in my practice session. Sorry for the background noise. If you like this music, it's available on s…	457	17010244	146520	5461	/@SoundofChinaGuzheng	SoundofChina Guzheng	729000
Chinese classical music	WGXzWkD6AWM	2009-2-1	https://www.youtube.com/watch?v=WGXzWkD6AWM	Famous Chinese Classical Music Return of the Fishing Boat	Famous Chinese Classical Music. Return of the Fishing Boat. Imagine you are in the picture, close your eyes and listen to this wonderful piece. This piece should bring you a new experience and great change of emotion when you listen to it.	281	867066	2834	334	/@angusfonghk	Angus	2,180
Chinese traditional music	B-Y4ncLy9LA	2010-1-20	https://www.youtube.com/watch?v=B-Y4ncLy9LA	Masterpieces of Chinese Music: A Musical Performance by Music from China	Learn more about the exhibition Eccentric Visions: The Worlds of Luo Ping (1733—1799), on view at the Met October 6, 2009—January 10, 2010: http://tinyurl.com/luoping The rich sonorities and compelling melodies of Chinese music are invoked on string instruments consisting of the erhu and related two-string fiddles, pipa (lute), zheng (long, plucked zither), ruan (moon guitar), and yangqin (hammer…	4430	2316587	14038	811	/@metmuseum	The Met	499000
Chinese traditional music	ME_u98E4aRU	2010-9-29	https://www.youtube.com/watch?v=ME_u98E4aRU	Chinese Traditional Music 10	Chinese Traditional Music. Relax your mind with this beautiful music. Play my playlist for more Chinese Traditional Music. I've got a few types of Chinese Music. Some you like and some you may not. Save the ones you like to your favorites, so you can always find them back! Please comment, rate and subscribe =) Thank you for listening!	126	397489	644	39	/@Joschepu	Joschepu	2,160
Chinese classical music	tu5XohUR3Pg	2013-10-2	https://www.youtube.com/watch?v=tu5XohUR3Pg	《梁祝》 Butterfly Lovers ErHu Concerto 指揮/閻惠昌 二胡/孫凰	#新竹青年國樂團 2013 竹塹國樂節 7/28《梁祝》 指揮/閻惠昌 二胡/孫凰 演出：新竹青年國樂團 Taiwan 地點：新竹市立演藝廳 Taiwan 這是台灣「新竹青年國樂團」的演奏，歡迎訂閱我們的 youtube 頻道觀賞更多的影 片 / @hcyco This is the performace by Hsinchu City Youth Chinese Orchestra, subscribe and press the bell icon for notification of more videos . / @hcyco	1761	11956147	120394	7513	/@welchang	welchang	192000
Chinese traditional music	rqZbR16Qs1o	2013-7-25	https://www.youtube.com/watch?v=rqZbR16Qs1o	Chinese Music – Imperial Dynasty	Chinese music about the beautiful land of China. This music I composed is called Imperial Dynasty. I hope you enjoy listening to it! *** 🏮 If you like this beautiful Chinese music, you'll love these playlists: Chinese music | • Chinese Music Japanese music | • Japanese Music *** 🎼 Buy Imperial Dynasty sheet music here : Sheet Music Plus: https://www.sheetmusicplus.com/title/... 🎵 Buy this music h…	269	7986064	84528	2919	/@DerekFiechter	Derek Fiechter's Music	194000
Chinese classical music	BtOde4_wc3Y	2014-10-12	https://www.youtube.com/watch?v=BtOde4_wc3Y	Chinese Classical Music【2】《煙雨江南》Chinese Pipa+Bambo Fluteo-720p	Chinese Classical Music Playlist=== • Chinese Classical Music Chinese Pipa + Chinese Bamboo Flute Playing	297	173088	1926	95	/@chepin386	che pin	41000
Chinese traditional music	gaVvvJf-4eE	2014-10-29	https://www.youtube.com/watch?v=gaVvvJf-4eE	Beautiful Chinese Music【9】Traditional【Ode to Coral】.mp4		230	500412	5493	267	/@chinesemusic2261	Chinese Music	8,920
Chinese traditional music	_IMJRoRWhrM	2014-10-29	https://www.youtube.com/watch?v=_IMJRoRWhrM	Beautiful Chinese Music【20】Traditional【The Blooming of Rainy Night Flowers】.mp4		266	211424	3646	163	/@chinesemusic2261	Chinese Music	8,920
Chinese classical music	-jAoD0ebhFY	2015-3-13	https://www.youtube.com/watch?v=-jAoD0ebhFY	Authentic Chinese Classical Music - Ming Dynasty Court and Taoist music (Yanyue)	This is court music from the Ming dynasty. It's now only played at Taoist Joss Houses in China. It's a very lively style. It's a dying art though, as the modern Chinese orchestra is becoming more common. But the modern Chinese orchestra is full of western influence, while Yanyue is native to China	243	199285	2794	229	/@yug4836	Yєu Ɲgนุуєท	935
Chinese classical music	QWe83JRGGcg	2015-6-12	https://www.youtube.com/watch?v=QWe83JRGGcg	Liu Zi Ling 刘紫玲 • Traditional Chinese Music • 阿里山的姑娘	Maiden Of Alisan (turn on Subtitiles) 高山青澗水藍 阿里山的姑娘美如水呀 阿里山的少年壯如山 阿......阿...... 阿里山的姑娘美如水呀 阿里山的少年壯如山 高山長青 澗水長藍 姑娘和那少年永不分呀 碧水長圍著青山轉 嘿娜魯彎哆依呀娜喲嗬依呀嘿 娜魯彎哆依呀娜喲嗬嘿呀 嗬依那多彎多依魯那呀嗬嘿呀 Thanks for being a part of my channel. Don't forget to SUBSCRIBE for more Traditional Chinese Music (中国传统音乐). 谢谢你的拜访。我希望你喜欢这首美丽的中国歌。请与您的朋友和家人分享。谢谢。 Follow Us: • Subscribe: https://goo.gl/87q6aG • Facebook: http://fb.com/ChinaMe…	233	11811051	74675	2484	/@TraditionalChina	Traditional China	177000
Chinese traditional music	N51zoKBCiMs	2015-6-5	https://www.youtube.com/watch?v=N51zoKBCiMs	Liu Zi Ling 刘紫玲 • Traditional Chinese Music • 花好月圆夜	Thanks for being a part of my channel. Don't forget to SUBSCRIBE for more Traditional Chinese Music (中国传统音乐). 谢谢你的拜访。我希望你喜欢这首美丽的中国歌。请与您的朋友和家人分享。谢谢。 Follow Us: • Subscribe: https://goo.gl/87q6aG • Facebook: http://fb.com/ChinaMedia • Chinese Instrumentals: https://goo.gl/TrdNLN	207	1811859	10490	296	/@TraditionalChina	Traditional China	177000
Chinese classical music	lTdumGJF9oo	2016-10-21	https://www.youtube.com/watch?v=lTdumGJF9oo	Beautiful Chinese Classical Dance【5】《采薇舞》A-1080p	Beautiful Chinese Dance Playlist=== • Beautiful Chinese Dance Performers = 中國歌劇舞劇院 China National Opera & Dance Drama Theater Chinese Classical Dance And Classical Music=【昔我往矣，楊柳依依。今我來思，雨雪霏霏。】 《music=采薇》;《Composer=張渠》 中國古典歌舞=【歌喉宛轉，聲如枝上鶯啼；舞態蹁躚，影似花間鳳轉。】 詩經==小雅==【采薇】 采薇采薇，薇亦作止。曰歸曰歸，歲亦莫止。靡室靡家，玁允之故。不遑啓居，玁允之故。 采薇采薇，薇亦柔止。曰歸曰歸，心亦憂止。憂心烈烈，載饑載渴。我戍未定，靡使歸聘。 采薇采薇，薇亦剛止。曰歸曰歸，歲亦陽止。王事靡監，不遑啓處。憂心孔疚，我行不來！ 彼爾維何？維常之華。彼…	248	4848246	39427	3119	/@chepin386	che pin	41000
Chinese traditional music	AVXejOoPECA	2016-11-17	https://www.youtube.com/watch?v=AVXejOoPECA	雨碎江南 二胡版 Rain in Jiang Nan_Erhu Cover	作曲：河图 编曲：丢子 翻奏 | 混音 | 剪辑：本人 Thank you for your coming~ Find me： 微博@柠露读乐 部分曲谱在公众号：柠露读乐（ninglulemon） 网易云音乐@柠露 http://music.163.com/#/artist?id=1089157 音频可下载~ B站：http://space.bilibili.com/10675785/	247	13354343	210969	6628	/@lemondew3560	柠露读乐Lemondew	932000
Chinese classical music	pDP9qDOmyt8	2016-2-22	https://www.youtube.com/watch?v=pDP9qDOmyt8	Classical Chinese folk song		180	343745	3828	323	/@chongiechong	Chongie Chong	884
Chinese traditional music	5pqPEta-J20	2016-8-29	https://www.youtube.com/watch?v=5pqPEta-J20	【中国民乐欣赏】Chinese Traditional Music 董敏笛曲《大鱼》Theme song of Big Fish & Begonia	♪Hello Chinese music fans, I hope everyone enjoys this MV cover. Let me know down the comments below what song you would like to hear next! 欢迎按赞和分享，未来会为各位带来更多好听的笛曲来陪伴你们！ ★Youtube: / @dongmindizi3032 ★Wechat：meyamusicstudio ★bilibili：https://space.bilibili.com/31030107/ ★Weibo：https://weibo.com/u/1711487567 ★Facebook: / dongmindiziofficial ★Instagram:Dongmin Dizi ★Email: dongmindizi@foxmail.com ★抖…	365	1869966	18532	665	/@dongmindizi3032	Dong Min Dizi	141000
Chinese traditional music	6NksUf0xg9k	2017-10-10	https://www.youtube.com/watch?v=6NksUf0xg9k	Sadness Chinese Instrumental Music - Bamboo Flute - Relaxing Music for Studying and Sleeping	Sadness Chinese Instrumental Music - Bamboo Flute - Relaxing Music for Studying and Sleeping Subscribe for more music ➥http://goo.gl/6pGbqB Hope you enjoyed. Let me see your feedback in the comments ♥ ––– Beautiful Chinese Music ➥ • Beautiful Chinese Music | Endless Love | B... Best relaxing with Piano ➥ • 视频 Most Emotional Bamboo Flute Music ➥ • Most Emotional Bamboo Flute Music | Relaxi... Than…	2756	11441772	126664	5931	/@LandWithoutWords	No Copyright Music - Free To Use	997000
Chinese classical music	obnrum0Qk6A	2017-10-25	https://www.youtube.com/watch?v=obnrum0Qk6A	Chinese Classical Music【5】《春江花月夜》Chinese Pipa-480p	Chinese Classical Music Playlist=== • Chinese Classical Music Chinese pipa playing- 古曲=《春江花月夜》 This is one of the famous Chinese classical music created in Ancient China.	583	267015	1324	72	/@chepin386	che pin	41000
Chinese classical music	JnNhRt2ob3M	2017-11-8	https://www.youtube.com/watch?v=JnNhRt2ob3M	Chinese folk song -- Look toward Beijing on the Grassland	乌兰图雅, 站在草原望北京, the singer is WuLanTuYa, who is a famous singer from inner Mongolia of China, good at classical Chinese folk songs.	245	2457560	31566	3982	/@tiezi00	tiezi00	122000
Chinese classical music	1o6T9GE6KMk	2017-3-8	https://www.youtube.com/watch?v=1o6T9GE6KMk	1 hour long Relaxing Chinese Classical Music - performed by Guzheng	1 hour long Relaxing Chinese Classical Music - performed by Guzheng 中国古典音乐 - 古筝 Song # 1 渔舟唱晚 yú zhōu chàng wǎn Song # 2 战台风 zhàn tái fēng Song # 3 寒鸦戏水hán yā xì shuǐ Song # 4 流水行云 liú shuǐ xíng yún Song # 5 汉宫秋月 hàn gōng qiū yuè Song # 6 蕉窗夜雨jiāo chuāng yè yǔ Song # 7 高山流水 gāo shān liú shuǐ Song # 8 出水莲 chū shuǐ lián Song # 9 平湖秋月píng hú qiū yuè Song # 10 梅花三弄méi huā sān nòng Song # 11 昭君怨 zhāo …	4130	517157	4996	148	/@pineapplemusicbox8937	PINEAPPLE MUSIC BOX	3,290
Chinese traditional music	J5Cc0kghnhM	2017-8-4	https://www.youtube.com/watch?v=J5Cc0kghnhM	Music Battle - Chinese traditional PK Western Instruments 闪光少女之民族乐 PK 西洋乐 精彩斗琴	Chinese traditional instruments PK Western instruments, which one is better ? you decide...	341	2174775	71977	3157	/@mark4553	Mark	4,180
Chinese traditional music	MvxbfpuccXo	2018-11-13	https://www.youtube.com/watch?v=MvxbfpuccXo	【古琴Guqin】《梅花三弄》Famous traditional Chinese music depicting plum blossoms	作曲：古曲 古琴演奏：蔡珊【微博@古琴蔡珊】 摄影/录音/混音/后期：唐彬【微博@超级唐葫芦】 出品：自得琴社 【微信公众平台Zideqinshe】 【微博@自得琴社】	450	2796131	25092	707	/@Zideqinshe	自得琴社 Zi De Guqin Studio	717000
Chinese traditional music	l735yPg84XY	2018-11-22	https://www.youtube.com/watch?v=l735yPg84XY	🔊Música China Tradicional Instrumental Antigua☯	Música China Tradicional - Tsubaki Music 🎶 🍁Lista de reproducción Música Oriental: ☛ • 🌷Musica Relajante Tradicional Asiatica ☚ ------------------------------------------------------------------------------------------------ Instagram : / tsubakimusic1 -------------------------------------------------------------------------------------------------- #Relaxing #AsianMusic #MusicaChina	21941	3047737	29053	884	/@TsubakiMusic	Tsubaki Music	403000
Chinese classical music	l-iLM79xqkY	2018-6-23	https://www.youtube.com/watch?v=l-iLM79xqkY	2 HOURS of The Best Traditional Chinese Music - Relaxing Music - #relax #music #cananda	2 HOURS of The Best Traditional Chinese Music - Relaxing Music - #relax #music #cananda	7200	280438	2726	181	/@kayleedarrell2114	Kaylee Darrell	789
Chinese classical music	2rcckLnrAbg	2018-7-5	https://www.youtube.com/watch?v=2rcckLnrAbg	Chinese Battle Music & Epic Chinese Music	Chinese battle music & epic Chinese music that will take you to ancient lands filled with danger and wonder. ⚔️ If you like this epic music compilation, you'll love these playlists: Chinese music | • Chinese Music Japanese music | • Japanese Music Epic music | • Pirate Music & Epic Music Buy our music here : iTunes : http://itunes.apple.com/album/id14044... Bandcamp : https://dbfiechter.bandcamp.…	3670	2509277	34200	756	/@DerekBrandonFiechter	Fantasy & World Music by the Fiechters	72000
Chinese traditional music	vuCe77vBYQM	2018-8-10	https://www.youtube.com/watch?v=vuCe77vBYQM	Beautiful Chinese Music | Chinese New Year | Instrumental Traditional Chinese Music	If you'd like to support me and my channel, consider checking out my enamel pin designs! I design both original concept pins as well as pop culture pieces and I ship both domestic (within the US) and international: 📍 Website | https://animapins.com 📍 Etsy | https://etsy.com/shop/animapins If you're interested, also check out my artist channel where I upload my own original music: ▶️ / @wuji9264 =…	3600	868548	5798	258	/@LanternLofiChill	Lantern	295000
Chinese traditional music	cKV0awb3J2Y	2018-9-10	https://www.youtube.com/watch?v=cKV0awb3J2Y	Chinese Empire/Qing Dynasty (1636-1912) Anthem "Cup of Solid Gold" Medley (1911)	Gong Jin'ou (Chinese: 鞏金甌; pinyin: gǒng jīn'ōu, lit. "Cup of Solid Gold") was the first official national anthem of China, created during the late Qing Dynasty; though it was used only for a short time due to the Republic of China overthrowing the Qing Dynasty. The song was composed by Bo Tong (溥侗), a high-ranking officer of the Imperial Guard. The lyrics, in Classical Chinese, were penned by Yan…	388	4806937	48270	7965	/@NorwegianBaron	Norwegian Baron	129000
Chinese traditional music	6Yb0jJ5kiIQ	2019-1-11	https://www.youtube.com/watch?v=6Yb0jJ5kiIQ	Upward to to the moon (Instrumental)	Instrumental version of the Original Sound Track from the series Ashes of Love composed by the member of Zi De Guqin Studio.	159	2126692	65273	1691	/@prashantkaithwas	Prashant Kaithwas	4,160
Chinese classical music	9fRjdFBjq7A	2019-2-19	https://www.youtube.com/watch?v=9fRjdFBjq7A	50首 古箏輕音樂 放鬆解壓 Relaxing Chinese Gu Zheng Musics	50首 古箏輕音樂 放鬆解壓 Relaxing Chinese Gu Zheng Musics • 50首 古箏輕音樂 放鬆解壓 Relaxing Chinese Gu Zheng M... Thanks for watching my video and do not for get to LIKE, COMMENT and SUBSCRIBE my channel. Thanks alls. ❗如果您是此频道上任何歌曲/图片的所有者，并且您想要删除歌曲，请在我的电子邮件中留言或留言，我会尽我所能将其删除。尽快地。 ❗ If you are the owner of any song/picture on this channel and you want to delete the song, please leave a message or leave a message in …	7050	2657354	17016	439	/@BeautifulRelaxingMusic835	KKBOX 音悦无限	146000
Chinese classical music	7tG8r3VBvEI	2019-5-26	https://www.youtube.com/watch?v=7tG8r3VBvEI	【古琴Guqin筝笛鼓】《空山鸟语》'Birdsong in hollow valley'——Beautiful Chinese court music style宫廷雅乐风 宋代装束 秦时明月	作曲：魏小涵【微博@魏小涵】 改编：唐彬【微博@超级唐葫芦】 古琴：白无瑕【微博@古琴白无瑕】 古筝：蔡珊【微博@古琴蔡珊】 长笛：唐彬 颂钵：殷屹浩楠【微博@殷屹浩楠楠楠楠】 框鼓：杨洋【微博@小羊杨七歌】 小打：叶力嘉【微博@透明光】 录音/混音/摄影/剪辑/后期：唐彬 联合出品：自得琴社【微博@自得琴社&@古琴诊所】 装束复原【微博@装束复原】	367	3363704	78146	5109	/@Zideqinshe	自得琴社 Zi De Guqin Studio	717000
Chinese traditional music	dQlj2RmDr2c	2019-7-8	https://www.youtube.com/watch?v=dQlj2RmDr2c	Traditional Chinese Music | Bamboo Flute Music | Relaxing, Meditation, Healing, Yoga, Sleep Music.	Traditional Chinese Music | Bamboo Flute Music | Relaxing, Meditation, Healing, Yoga, Sleep Music. Traditional Chinese Music | Bamboo Flute Music | Relaxing, Meditation, Healing, Yoga, Sleep Music. Traditional Chinese Music | Bamboo Flute Music | Relaxing, Meditation, Healing, Yoga, Sleep Music. https://bit.ly/2L4aE8R Thanks for watching!	10685	457640	6394	217	/@jojoemurphy11B	器乐	1,930
Chinese classical music	AqJuVSu58oI	2019-8-28	https://www.youtube.com/watch?v=AqJuVSu58oI	4 Hours Classical Music for Sleeping	🎵 Buy the MP3 album on the Official Halidon Music Store: https://bit.ly/3gEBEI7 🎧 Listen to our playlist on Spotify: http://bit.ly/PianoDeepSleep 💿 Order “Music For Sleeping” (2 CDs) on Amazon✨: https://lnk.to/CDMusicforSleep 🛍️Visit the Halidon shop on Amazon: https://lnk.to/StoreHalidon These recordings are available for sync licensing in web video productions, corporate videos, films, ads and …	14254	13331334	103112	3650	/@HALIDONMUSIC	HALIDONMUSIC	494000
Chinese traditional music	f7lixpPEKWI	2019-9-24	https://www.youtube.com/watch?v=f7lixpPEKWI	10 Hours of Relaxing Chinese Music | Stress Relief | 10 Hours Relaxing	Hi! I’m 10 Hours Relaxing. On my channel, you will find all kind of relaxing related stuff. I love sharing my crazy 10 Hours videos with you. Subscribe to see more of it on your feed! https://www.youtube.com/channel/UCZNy... You can also find me on: Facebook: coming soon Twitter: coming soon Instagram: coming soon	36000	235574	2527	59	/@10hoursrelaxing36	10 Hours Relaxing	968
Chinese traditional music	GwyXQO0tSW4	2020-10-9	https://www.youtube.com/watch?v=GwyXQO0tSW4	Relaxing With Chinese Bamboo Flute, Guzheng, Erhu | Instrumental Music Collection	最好的古筝 好聽的中國古典音樂 笛子名曲 中国古代音乐 古箏音樂 放鬆心情 安靜音樂 早上放松的音乐 瑜伽 • 超好聽的中國古典音樂 笛子名曲 古箏音樂 放鬆心情 安靜音樂 瑜伽音樂 優美的二胡音... ♫ Spotify: https://spoti.fi/3oxafP6 ♫ Apple Music: https://apple.co/2Yi32Hz ♫ Itunes: https://apple.co/2Yi32Hz © Music copyright is licensed swimming BEO Entertainment #TraditionalChinese Music #RelaxingMusic #ChineseMusic #InstrumentalChinese Music Music removes all sorrows, listening and relaxi…	11703	17015079	248949	7365	/@-traditionalchinesemusic6672	中国乐器 - Traditional Chinese Music	261000
Chinese traditional music	qp7SRVr0R8c	2020-11-8	https://www.youtube.com/watch?v=qp7SRVr0R8c	Relaxing With Chinese Bamboo Flute, Pipa, Guzheng ♥️ Instrumental Music Collection ♥️ 伝統的なフルート音楽	The best music of the channel, please check it out for more details https://www.youtube.com/watch?v=acUTQ... ♫ Spotify: https://spoti.fi/3oxafP6 ♫ Apple Music: https://apple.co/2Yi32Hz ♫ Itunes: https://apple.co/2Yi32Hz © Music copyright is licensed swimming BEO Entertainment #Traditional Chinese Music #Relaxing Music # Chinese Music #Instrumental Chinese Music Music removes all sorrows, listenin…	11703	1102646	17860	411	/@-traditionalchinesemusic6672	中国乐器 - Traditional Chinese Music	261000
Chinese traditional music	XmBji07OtwA	2020-11-9	https://www.youtube.com/watch?v=XmBji07OtwA	Relaxing With Chinese Bamboo Flute, Guzheng, Erhu | Instrumental Music Collection	最好的古筝 好聽的中國古典音樂 笛子名曲 中国古代音乐 古箏音樂 放鬆心情 安靜音樂 早上放松的音乐 瑜伽 • 超好聽的中國古典音樂 笛子名曲 古箏音樂 放鬆心情 安靜音樂 瑜伽音樂 優美的二胡音... #TraditionalChineseMusic #古典音乐 #ChineseMusic #InstrumentalChinese Music Music removes all sorrows, listening and relaxing makes life better ♫ Spotify: https://spoti.fi/3oxafP6 ♫ Apple Music: https://apple.co/2Yi32Hz ♫ Itunes: https://apple.co/2Yi32Hz © Music copyright is licensed swimming BEO Ent…	10620	14137022	267756	5318	/@-traditionalchinesemusic6672	中国乐器 - Traditional Chinese Music	261000
Chinese traditional music	YLkNmyFrNf0	2020-12-19	https://www.youtube.com/watch?v=YLkNmyFrNf0	【笛子】美丽的神话The beautiful myth | Chinese Bamboo Flute cover | Shirley (Lei Xue)	歌名：【笛子】美丽的神话 Subscribe to 【Shirley's Official Channel】channel now ▶https://bit.ly/shirleyflute11 Like, Share and Comment ╭(●｀∀´●)╯╰(●’◡’●)╮ If you like my videos, please consider making a donation. This will help me to be able to make more videos :) Thanks 👉🏻https://paypal.me/ShirleyFlute 如果你喜欢我的视频可以给我充电投币吖~ https://paypal.me/ShirleyFlute 歡迎訂閱頻道【薛雷ShirleyFlute】▶https://bit.ly/shirleyflute11 希望你们喜…	291	7751111	106686	2776	/@shirleyflute	薛雷ShirleyFlute	841000
Chinese traditional music	1Wh94kXdNvs	2020-3-11	https://www.youtube.com/watch?v=1Wh94kXdNvs	【難忘的旋律】Unforgettable Evergreen 中西合奏精選 Chinese Traditional Music Collection	楊州小調 心愛的馬車 桃花江 採檳榔 採花撲蝶 山南山北走一回 馬車夫之戀 括地風 銹金編 朱大嫂送雞蛋 何必去燒香 一只鴨子 鴛鴦水鴨 草蜢弄雞公 我來也 丟丟冬 彩虹妹妹 春天裡 來格通 拉茲之歌 歡樂頌 加多一點點 難忘的初戀情人 回娘家 一剪梅 #难忘的旋律#中西合奏精选#恰恰#Chacha#华乐#楊州小調#心愛的馬車#桃花江#採檳榔#採花撲蝶#山南山北走一回#馬車夫之戀#括地風#銹金編#朱大嫂送雞蛋#何必去燒香#一只鴨子#鴛鴦水鴨#草蜢弄雞公#我來也#丟丟冬#彩虹妹妹#春天裡#來格通#拉茲之歌#歡樂頌#加多一點點#難忘的初戀情人#回娘家 #一剪梅#杨州小调#心爱的马车#桃花江#采槟榔#采花扑蝶#山南山北走一回#马车夫之恋#括地风#锈金编#朱大嫂送鸡蛋#何必去烧香#一只鸭子#鸳鸯水鸭#草蜢弄鸡公#我来也#丢丢冬#彩虹妹妹#春天里#来格通#拉兹之歌#欢乐颂#加多一点点#难忘的初恋情…	3177	255592	1966	35	/@MetroMuzikChinese	Metro Muzik Chinese 樂都唱片	452000
Chinese classical music	Y-NWupG3kr0	2020-4-10	https://www.youtube.com/watch?v=Y-NWupG3kr0	Relaxing music -Chinese Pipa classic music ,peaceful and relaxing	★ Hello People of all over The World! Welcome to my Channel! ★ I Hope everyone feel comfortable with all of music in my channel 🎵The pipa (Chinese: 琵琶) is a four-stringed Chinese musical instrument, belonging to the plucked category of instruments. Sometimes called the Chinese lute, the instrument has a pear-shaped wooden body with a varying number of frets ranging from 12 to 26 銜花金鳳當承撥 轉腕攏弦促揮抹 花…	6156	116906	2307	48	/@yingying9389	Yingying “开心果乐园”	4,470
Chinese traditional music	VIVfOCd04BA	2020-4-11	https://www.youtube.com/watch?v=VIVfOCd04BA	Relaxing music -Chinese Guqin classic music ,peaceful and relaxing	★ Hello People of all over The World! Welcome to my Channel! ★ I Hope everyone feel comfortable with all of music in my channel ! 🎵Introduction---The Chinese guqin: 古琴) is a plucked seven-string Chinese musical instrument of the zither family.It has been played since ancient times, and has traditionally been favoured by scholars and literati as an instrument of great subtlety and refinement, as h…	3555	1035090	22585	380	/@yingying9389	Yingying “开心果乐园”	4,470
Chinese classical music	EOjve-nyYfQ	2020-6-27	https://www.youtube.com/watch?v=EOjve-nyYfQ	1 HOUR of Best Relaxing Music | Bamboo Flute | Sleep Music | Meditation Music | Peaceful Sleep Music	Presenting Bamboo Flute Music which is "Relaxing & Sleeping Music". Meditation Music that Relaxes Mind, Body & Anxiety and provides positive energy. Hope you find inner peace through mediation with this music. 🌈"Quiet The Mind And The Soul Will Speak". 🔔 Subscribe for updates from ‪@NovaRelaxingMusic‬ https://bit.ly/NovaRelaxingMusic Beautiful Relaxing Music 🌟 Relaxing Piano Music - • Relaxing Pi…	3406	9636499	116800	5287	/@NovaRelaxingMusic	Nova Relaxing Music	764000
Chinese classical music	S_uD_BqC2gg	2020-7-1	https://www.youtube.com/watch?v=S_uD_BqC2gg	Beautiful Asian Music - Koto Music, Relaxing Music, Hotchiku. Sleep Music, Meditation | 3 Hours	Beautiful Asian Music - Koto Music, Relaxing Music, Hotchiku. Sleep Music, Meditation | 3 Hours Download songs/Support artist: https://www.patreon.com/dannyfortress... Bandcamp: https://dannyfortress.bandcamp.com/ Donations to help me keep doing music: https://www.paypal.com/paypalme/Danny... This is an extended video of Inari's song, a Japanese instumental song I composed. Enjoy this work. Insta…	11004	5730267	98265	2301	/@dannyfortressfantasymusic4745	Danny Fortress Fantasy Music	211000
Chinese classical music	QJdBXbp9afY	2020-7-13	https://www.youtube.com/watch?v=QJdBXbp9afY	Musik klasik Cina super Bagus, Seruling, Musik Terkenal, Musik Guzheng, Bersantai, Musik Tenang, Mus	Musik klasik Cina super Bagus, Seruling, Musik Terkenal, Musik Guzheng, Bersantai, Musik Tenang, Musik Yoga, Musik Meditasi, Musik Tidur Nyenyak - Hermosa Música De Flauta, Música Para Meditación 超好聽的中國古典音樂 笛子名曲 古箏音樂 放鬆心情 安靜音樂 瑜伽音樂 冥想音樂 深睡音樂 - Tokopedia : https://www.tokopedia.com/buddhaart88...	11703	2293376	27052	1408	/@BuddhaArt	Buddha Art 8888	164000
Chinese traditional music	C_y7zQUZ7pM	2020-8-12	https://www.youtube.com/watch?v=C_y7zQUZ7pM	MO LI HUA Lyrics Traditional Chinese Song	Grade 8 Music - Second Quarter East Asian Music Music of China Vocal Music of China Mo Li Hua, Jasmine Flower A traditional Chinese song with a beautifully gentle and lyrical melody . The lyrics is about the Jasmine flower also turn it into a love song . The song describes a custom of giving Jasmine Flowers, popular in the southern Yangtze Delta Region of China . Translation: What a beautiful Jas…	153	4011473	36296	3758	/@avemaristelavillaflores6001	Ave Maristela Villaflores	561000
Chinese traditional music	EyWXL-j3fUs	2020-8-18	https://www.youtube.com/watch?v=EyWXL-j3fUs	古琴名曲: 《高山》/ 《流水》/《高山流水》Chinese Traditional Music: Guqin	“不管你今后如何重要，总会有一天从热闹中逃亡，孤舟单骑，只想与高山流水对晤。走得远了，也许会遇到一个人，像樵夫，像隐士，像路人，出现在你与高山流水之间，短短几句话，使你大惊失色，引为终生莫逆。但是，天道容不下如此至善至美，你注定会失去他，同时也就失去了你的大半生命。” - - 余秋雨 《高山》姚丙炎 00:00 《流水》管平湖 07:58 《高山流水》候作吾 15:18	1398	155527	1649	54	/@feisun8660	Haven of the Soul _ Fei Sun	38000
Chinese traditional music	DcHS3_A__Wg	2020-8-9	https://www.youtube.com/watch?v=DcHS3_A__Wg	古典音乐 传统音乐 超極致中國風音樂 - 中泱泱華夏千古風華 最好的中國古典音樂在早上放鬆 適合學習冥想放鬆的超級驚豔的中國古典音樂 古箏、琵琶、竹笛、二胡 中國風純音樂的獨特韻味	古典音乐 传统音乐 超極致中國風音樂 - 中泱泱華夏千古風華 最好的中國古典音樂在早上放鬆 適合學習冥想放鬆的超級驚豔的中國古典音樂 古箏、琵琶、竹笛、二胡 中國風純音樂的獨特韻味	11703	14172789	146499	5615	/@Guzhengmusic88888	古典音樂 - Guzheng Music	374000
Chinese classical music	v5ycI5uOZ4c	2021-10-16	https://www.youtube.com/watch?v=v5ycI5uOZ4c	You're a Royal falling in love in an Ancient Asian Kingdom	Idea by "Elllen". Thanks :) Thumbnail Info: Drawing: Five Court Musicians in Modern Style Artist: Torii Kiyomine (1787-1868) Image: https://pin.it/1mx0Ag5 Do you like classical music? 🎻 Check out our classical playlist on spotify: https://open.spotify.com/playlist/5KD... Or On 🍎 apple music : / classical-bangers Subscribe on my personal channel, please :) / @etymologyrecords #playlist #studyplayl…	3320	2363802	142350	1874	/@ultravcletplaylists	ultravclet	315000
Chinese traditional music	2nMUu5iqVs4	2021-10-22	https://www.youtube.com/watch?v=2nMUu5iqVs4	古琴《菩提心》: 李祥霆/ Chinese Traditional Music, Guqin “Pu Ti Xin (Bodhicitta)”: LI Xiang Ting	古琴《菩提心》: 李祥霆/ Chinese Traditional Music, Guqin “Pu Ti Xin (Bodhicitta)”: LI Xiang Ting 古琴曲《菩提心》，选自古琴大师李祥霆先生的专辑《心》。该专辑在李祥霆先生所理解之佛家精神，所感觉之佛家气象前题下，选定十个题目即兴演奏录制而成，可谓“意至深，理至微，音至乐，明心见性之正音”。 《华严经》所载：“菩提心者，则为一切诸佛种子，能生一切诸佛法故。菩提心者，则为良田，长养众生白净法故。菩提心者，则为大地，能持一切诸世间故。菩提心者，则为净水，洗濯一切烦恼垢故。菩提心者，则为大风，一切世间无障碍故。菩提心者，则为盛火，能烧一切邪见爱故。菩提心者，则为净日，普照一切众生类故。菩提心者，则为明月，诸白净法悉圆满故。” 图片来源: 张大千《观世音造像》 https://arts.yiewan.com/news-id…	3981	152126	2094	46	/@feisun8660	Haven of the Soul _ Fei Sun	38000
Chinese traditional music	IVJxKlezJC4	2021-10-6	https://www.youtube.com/watch?v=IVJxKlezJC4	Sadness Chinese Instrumental Music - Best Bamboo Flute & Guzheng - Relaxing Music for Sleeping	The best music of the channel, please check it out for more details https://www.youtube.com/watch?v=acUTQ... #Traditional Chinese Music #Relaxing Music # Chinese Music #Instrumental Chinese Music Music removes all sorrows, listening and relaxing makes life better Thank you for always supporting me Have fun listening to music ✔️ Follow Facebook : hhttps://bit.ly/2VafFmN Subscribe to support me liv…	10699	617099	8363	207	/@-traditionalchinesemusic6672	中国乐器 - Traditional Chinese Music	261000
Chinese traditional music	Ci8KHAfAUq0	2021-1-1	https://www.youtube.com/watch?v=Ci8KHAfAUq0	dressed in red for your wedding ◈【oriental chinese playlist】	dressed in red for your wedding ◈ oriental chinese playlist traditional chinese themed bgm/songs ◈ 中国风 bgm 【timestamps】 ◈ 00:00 爱情主题 ◈ 01:54 用此一生 ◈ 04:14 别恐惧 ◈ 06:18 华胥一梦 ◈ 08:46 初见 ◈ 13:16 爱情主题 (repeat) ◈ 15:10 用此一生 (repeat) ◈ 17:30 别恐惧 (repeat) ◈ 19:36 华胥一梦 (repeat) ◈ 22:01 初见 (repeat)	1593	132047	5283	114	/@yuecubed	yuecubed	103000
Chinese classical music	0KVmcb4YAgs	2021-11-20	https://www.youtube.com/watch?v=0KVmcb4YAgs	古琴《禅定》: 李祥霆 / Chinese Traditional Music, Guqin “Chan Ding (Buddhist Meditation)”: LI Xiang Ting	古琴曲《禅定》选自李祥霆先生的专辑《心》(风华国韵系列) © 2009 龙源音乐。 “禅”是外不着相，不执着一切境界相是为禅；“定”是内不动心。潘国静禅师曰: “禅者藏也，未见此物，不知何物，只有依悟，明心见性。” 由「凡人」到「成佛」整个过程中，起关键性作用的是「禅定」，没有它发挥积极作用，「凡人」是无法达到「成佛」的境界。 独处之时，听一曲李祥霆先生的《禅定》，悠然的琴声犹如一缕佛香，让心底的一抹浮躁烟消云散。故而在纷繁世事中寻得一片安逸，静坐敛心，专注一境，思行悟禅，忘言息虑。 图片来源: 薛大庸人物画 龙牙居遁禅师《学道》 https://www.yczihua.com/goods-6110.html 薛大庸，字兰石，1966年出生于河南。中国书画家杂志社艺术总监。作品多次在东南亚及日本、韩国展出，部分作品被中国当代书画院永久收藏。	3991	1111690	11650	268	/@feisun8660	Haven of the Soul _ Fei Sun	38000
Chinese classical music	bVO3MmEwXTI	2021-11-22	https://www.youtube.com/watch?v=bVO3MmEwXTI	☯ Best Traditional Chinese Music Lofi ☯	#boylofi #Lofi #Relax Sleep #Chinese #Instrumental #LofiChinese Subscribe for more videos Suscríbete para más vídeos ⛩️ Tracklist 00:00 greenface x Refeeld - Red Lamps. 02:10 Aphrow - Lion Dance. 04:01 Naga x C4C - Sunflower Samurai. 05:41 MFakka - Shanghai. 07:15 Naga x Aphrow - Ghuzeng. 09:04 La Cantina - Ye Ying. 11:46 Stuffed Tomato x Aphrow - Metal Splinter. 14:32 Chiccote's Beats - Nanjing …	6382	429647	6603	177	/@boylofi9119	Boy Lofi	2,150
Chinese traditional music	0-TviKe8IsE	2021-1-21	https://www.youtube.com/watch?v=0-TviKe8IsE	10 Hours of Chinese Instrumental Music		36984	735428	6660	368	/@keshawnmclaughlin2064	Keshawn McLaughlin	1,300
Chinese traditional music	-Q4l-DnqdMo	2021-1-21	https://www.youtube.com/watch?v=-Q4l-DnqdMo	Instrumental Chinese Music Bamboo Flute & Guzheng Instrumental Music for Learning & Sleeping 1		1217	327549	4668	95	/@sunflowermusic2629	SunFlower Music	1,250
Chinese traditional music	NVjEdHmlwCU	2021-4-29	https://www.youtube.com/watch?v=NVjEdHmlwCU	Guqin- Traditional Chinese Music	Guqin: Li Xiangting (Ancient Rhyme of Yuan Song) "Purple Flower" Guqin "Purple Flower" is taken from Mr. Li Xiangting's Guqin and Xiao improvisation album "Yuanqu Ancient Rhyme". Following "The Poetic Flavor of the Tang Dynasty" and "The Poetic Meaning of the Song Dynasty", Mr. Li Xiangting's "The Ancient Rhyme of Yuan Opera" once again interprets the unique artistic charm of Yuan Opera with the …	3893	143062	2542	71	/@pinkmonkey3374	Pink Monkey	4,530
Chinese traditional music	jH0SlAfUUW8	2021-7-19	https://www.youtube.com/watch?v=jH0SlAfUUW8	古琴曲《风月无古今》: 巫娜 / Chinese Traditional Music, Guqin “Feng Yue Wu Gu Jin”: WU Na	古琴曲《风月无古今》: 巫娜 / Chinese Traditional Music, Guqin “Feng Yue Wu Gu Jin”: WU Na 天地大美品禅意, 古今风月觅琴音 古琴曲《风月无古今》，取出自巫娜专辑《风月无古今》。 古琴：巫娜; 笛子/萧/竖笛：喻晓庆。出版公司：广东音像出版社有限公司。出品公司：广东龙源音像有限公司。 ＩＳＢＮ：978-7-79840-702-0，发行时间：2016。 图片来源: 吴大恺 国画雪景《觅禅》 https://www.yczihua.com/goods-18587.html 吴大恺，原名吴强，曾用名吴虹堂，四川人，毕业于四川民族学院美术系，后于文化部中国画研究院高研班(现中国国家画院)学习。现为现为中国亚布力冰雪艺术协会秘书长，中国亚布力冰雪国画院院长，中国美术学会会员，世界华人企业家联合会荣誉主席，斯洛伐克华人青年联合商会艺术顾…	4047	645992	11270	291	/@feisun8660	Haven of the Soul _ Fei Sun	38000
Chinese classical music	f33V8EOdmOw	2021-7-21	https://www.youtube.com/watch?v=f33V8EOdmOw	《明鏡菩提》純音樂 笛子與古箏的完美結合（Perfect combination of flute and guzheng）- Chinese classical music Flute music	《明鏡菩提》純音樂 笛子音乐 古筝音乐 （Perfect combination of flute and guzheng）- Chinese classical music Flute music Guzheng music 菩提本无树，明镜亦非台。本来无一物，何处惹尘埃	1742	156965	1166	47	/@musicsunlove2222	Music Sun Love	4,310
Chinese traditional music	nI-6Uv0U028	2021-8-21	https://www.youtube.com/watch?v=nI-6Uv0U028	3 Hours of Traditional Chinese Music 2021 - The Best Chinese Instrumental Music	The best music of the channel, please check it out for more details https://www.youtube.com/watch?v=acUTQ... ♫ Spotify: https://spoti.fi/3oxafP6 ♫ Apple Music: https://apple.co/2Yi32Hz ♫ Itunes: https://apple.co/2Yi32Hz © Music copyright is licensed swimming BEO Entertainment #Traditional Chinese Music #Relaxing Music # Chinese Music #Instrumental Chinese Music Music removes all sorrows, listenin…	10731	2462617	32286	916	/@-traditionalchinesemusic6672	中国乐器 - Traditional Chinese Music	261000
Chinese traditional music	tIYu_mWBTkI	2021-8-21	https://www.youtube.com/watch?v=tIYu_mWBTkI	Beautiful Chinese Relaxing Music - Guzheng & Bamboo Flute Instrumental Zen For Meditation	The best music of the channel, please check it out for more details https://www.youtube.com/watch?v=acUTQ... ♫ Spotify: https://spoti.fi/3oxafP6 ♫ Apple Music: https://apple.co/2Yi32Hz ♫ Itunes: https://apple.co/2Yi32Hz © Music copyright is licensed swimming BEO Entertainment #Traditional Chinese Music #Relaxing Music # Chinese Music #Instrumental Chinese Music Music removes all sorrows, listenin…	11647	1983323	18713	457	/@-traditionalchinesemusic6672	中国乐器 - Traditional Chinese Music	261000
Chinese traditional music	urGPgmaTgko	2021-8-24	https://www.youtube.com/watch?v=urGPgmaTgko	Música Tradicional China, Hermosa Música Guzheng, Relajante Flauta De Bambú Y Música Erhu Selección	♫ Spotify: https://spoti.fi/3oxafP6 ♫ Apple Music: https://apple.co/2Yi32Hz ♫ Itunes: https://apple.co/2Yi32Hz © Music copyright is licensed swimming BEO Entertainment Música Tradicional China, Hermosa Música Guzheng, Relajante Flauta De Bambú Y Música Erhu Selección ¡Gracias por ver! ¡No olvides SUSCRIBIRTE, ME GUSTA Y COMPARTIR mi video si lo disfrutas! 😍😍😍 ✅ SÍGUEME: https://bit.ly/3BVvoH1 ✅ S…	5369	3309563	50476	1080	/@peaceyourmind2449	Musica Relaxing Beautiful	104000
Chinese classical music	C8P7101BzSg	2022-10-16	https://www.youtube.com/watch?v=C8P7101BzSg	'A Flute Girl' Most Beautiful Chinese Flute Music Endless love	'A Flute Girl' Most Beautiful Chinese Flute Music Endless love Thanks for watching. If you like video please "SUBSCRIBE" - "LIKE" - "SHARE" -"COMMENT" You can enjoy more songs and support my channel at: / @-bambooflute65	2588	131310	1787	65	/@-bambooflute65	中国乐器 - Bamboo flute	9,300
Chinese classical music	IO1YcB1tCLo	2022-11-14	https://www.youtube.com/watch?v=IO1YcB1tCLo	BEAUTIFUL RELAXING GUZHENG MUSIC WITHOUT ADS✨Beautiful Traditional Chinese Music,Popular Flute Music	【偉大的中國古典音樂】沒有廣告的輕鬆經典音樂偉 笛子名曲 古箏音樂 放鬆心情 安靜音樂 瑜伽音樂 優美的二胡音樂放鬆 笛子音乐 轻音乐🎵 Relaxing With Classical Chinese • 【偉大的中國古典音樂】沒有廣告的輕鬆經典音樂偉 笛子名曲 古箏音樂 放鬆心情 安靜音... ----------------------------------💢✨🎶🎵🪕🎻🎼---------------------------------------- 👉非常感謝收看。不要忘記點贊,評論這個視頻 👉請訂閱我的頻道按通知鈴每天聽輕鬆的音樂 感謝您一直陪伴頻道，如果您想收聽更優美輕鬆的音樂，可以到下面的鏈接收聽。 ♫ 播放列表：https://www.youtube.com/playlist?list... ♫【早上最適合聽的輕音樂】：https://www.youtube.com/pl…	3019	1547984	17481	450	/@TraditionalChineseMusic123	古典音樂 - Traditional Chinese Music	579000
Chinese traditional music	lI1L2l6vi-4	2022-1-16	https://www.youtube.com/watch?v=lI1L2l6vi-4	A Floating and Beautiful Chinese Dizi Song. Chinese traditional music. Bamboo flute. Musical Moments	梅開百花之先，凌霜鬥雪，獨天下而春。 曲作者將堅守信仰，歷盡魔難而不改初心，自強不息的仁人志士比作在霜雪中傲然綻放的春梅，讚頌他們的高潔，堅韌、忠貞不渝的高風亮節。 作曲：陳國華 笛子演奏：陳國華 音頻後期處理：Joseph Ma © 2021 Atlantic Studios Inc. All rights reserved.	442	2843312	26886	837	/@MusicalMomentsEast	Musical Moments - East	23000
Chinese traditional music	2CfY0cceaQM	2022-1-28	https://www.youtube.com/watch?v=2CfY0cceaQM	古琴《归心》: 空雨 / Chinese Traditional Music, Guqin “Back to the Heart”: Kong Yu	阅尽世事，大彻大悟，回归本心。 听琴如修禅，用一颗宁静的心去觉知舒缓的琴乐、微妙的琴音和悠长的琴韵 ... ... 空雨, 独立心灵音乐人，生于粤东客家小镇龙窝，现居广州白云山下。好行脚游历,深受人间冷暖，在浮躁不安的末法时期，修习音声之道。主要作品还包括《静水禅音》,《禅雨》,《大安详》,《色即是空》（与朱方琼、梁奕源合作）,《香》（与朱方琼、梁奕源合作）,《弟子规》及《三字经》等。 书法及图片来源: Bgor Bgor "學深見廣，神靜心安！" / 17579. .	3963	137988	1866	58	/@feisun8660	Haven of the Soul _ Fei Sun	38000
Chinese traditional music	yO08fxwEBnI	2022-3-8	https://www.youtube.com/watch?v=yO08fxwEBnI	Chinese traditional music - Erhu (Chinese violin), No copyright	The erhu (Chinese: 二胡; pinyin: èrhú; [aɻ˥˩xu˧˥]) is a two-stringed bowed musical instrument, more specifically a spike fiddle, which may also be called a Southern Fiddle, and is sometimes known in the Western world as the Chinese violin or a Chinese two-stringed. Chinese tradisional music, instrumental	231	301837	3113	61	/@WanWanOfficialX	WanWan official	1,330
Chinese classical music	dI1JNejPSuk	2022-5-21	https://www.youtube.com/watch?v=dI1JNejPSuk	Chinese Music Instrumental 💖 A Beautiful classic 💖Chinese electronic flute and exciting songs	Chinese Song 💖 A beautiful classic 💖Chinese electronic flute and exciting songs → Don't forget to Like & Share the mix if you enjoy it! Thank You!! Help Us to Get 100.000 Subscribe , PLEASE !!! → If this music makes you happy , make sure to like ,subscribe & Please share this Mix on social pages (Facebook, Reddit, Twitter, etc.) so more people can listen together! ✉ Email → contact.dj.cuongvan@gm…	961	3308995	25905	1040	/@%EC%B9%B4%EC%A7%80%EB%85%B8%EC%86%94%EB%A3%A8%EC%85%98%EA%B3%B5%EC%8B%9D	BloodSapphire2313	218000
Chinese traditional music	n9ArWpDSBJw	2022-6-11	https://www.youtube.com/watch?v=n9ArWpDSBJw	Mo Li Hua Jasmine Flower Chinese Traditional Folk Song with English Translation	Mo Li Hua is a Chinese Traditional Folk Song about the Jasmine Flower. Learn how to sing it with this video that includes the Chinese pin yin lyrics as well as the English translation. Get the Music of China Teaching Package Here: https://www.teacherspayteachers.com/P...	99	656213	5391	516	/@GermaineTay	Germaine Tay	393000
Chinese traditional music	GIdxS6Wx0ZQ	2022-6-7	https://www.youtube.com/watch?v=GIdxS6Wx0ZQ	Nice Asian Music 🥰 Chinese Song 🥰 A song Beautiful Melody Soothing sound	Nice Asian Music 🥰 Chinese Song 🥰 A song Beautiful Melody Soothing sound → Don't forget to Like & Share the mix if you enjoy it! Thank You!! Help Us to Get 100.000 Subscribe , PLEASE !!! → If this music makes you happy , make sure to like ,subscribe & Please share this Mix on social pages (Facebook, Reddit, Twitter, etc.) so more people can listen together! ✉ Email → contact.dj.cuongvan@gmail.com…	1764	1489144	10937	348	/@%EC%B9%B4%EC%A7%80%EB%85%B8%EC%86%94%EB%A3%A8%EC%85%98%EA%B3%B5%EC%8B%9D	BloodSapphire2313	218000
Chinese classical music	8UWQ8qiLhzc	2022-7-1	https://www.youtube.com/watch?v=8UWQ8qiLhzc	Beautiful Chinese Music - Guzheng & Bamboo Flute, Instrumental Zen For Relax	→ Don't forget to Like & Share the mix if you enjoy it! Thank You!! Help Us to Get 100.000 Subscribe , PLEASE !!! → If this music makes you happy , make sure to like ,subscribe & Please share this Mix on social pages (Facebook, Reddit, Twitter, etc.) so more people can listen together! ✉ Email → contact.dj.cuongvan@gmail.com → Facebook →https://bit.ly/3lzKueh	2659	864931	7978	308	/@%EC%B9%B4%EC%A7%80%EB%85%B8%EC%86%94%EB%A3%A8%EC%85%98%EA%B3%B5%EC%8B%9D	BloodSapphire2313	218000
Chinese classical music	SIOarDUNhu8	2022-8-13	https://www.youtube.com/watch?v=SIOarDUNhu8	1920-1950 年中國經典歌曲	This video is sponsored by Weebit. Create your own website in minutes and get all the features you need with just the basic plan. Check out http://www.weebit.ca [0:00] 相思河 Missing By the Riverside [2:24] 昨夜你对我一笑 Smile At Me Last Night [5:15] 明月千里寄相思 The Moon Tells My Love [8:27] 如果没有你 If Without You [10:47] 採檳榔 Picking Betel Nuts [15:00] 夜上海 Shanghai Night [19:14] 月光小夜曲蔡琴 Moonlight Serenade [23:3…	1664	2837982	43314	1347	/@shanghaigramophonejazzband7485	上海留聲機樂隊 – Shanghai Gramophone Jazz Band	4000
Chinese classical music	LfzRiMNmQTw	2023-12-9	https://www.youtube.com/watch?v=LfzRiMNmQTw	推荐50多岁以上的人真正喜欢的歌曲 ♣ 50首70、80、90年代唱遍大街小巷的歌曲今天给大家推荐 , 林淑容 , 李茂山 , 李茂山	推荐50多岁以上的人真正喜欢的歌曲 ♣ 50首70、80、90年代唱遍大街小巷的歌曲今天给大家推荐 , 林淑容 , 李茂山 , 李茂山 00:00:00 01. 枫叶情 00:03:47 02. 对你怀念特别多 00:06:38 03. 星夜的离别 00:09:55 04. 情难守 00:13:49 05. 另一个结局 00:17:11 06. 告诉你爱的时候 00:21:38 07. 三年 00:25:43 08. 梨花泪 00:29:21 09. 往事只能回味 00:32:34 10. 葡萄成熟时 00:36:17 11. 难忘的初恋情人 00:39:41 12. 往事难追忆 00:43:13 13. 无言的结局 00:46:59 14. 梦在你怀中 00:50:49 15. 良夜不能留 00:54:17 16. 恨你不回头 00:58:14 17. 真情 01:02:10 18. …	12621	1622759	26372	245	/@heartwarmers9215	Heart Warmers	132000
Chinese traditional music	UDuDDHNb2Sk	2023-2-6	https://www.youtube.com/watch?v=UDuDDHNb2Sk	Traditional Chinese Musical Ensemble: The Harmony of Heaven and Earth | 河南卫视2023元宵奇妙游——民乐演奏《天地之和》	Composer: Zhang Qu Arrangement: Zhang Qu, Wang Wei Chinese Drum: Wang Jianan Suona: Liu Xizhan Pipa: Luo Yi Bamboo Flute: Ma Yunhe Guzheng: Mo Yun In the ensemble, the vigorous and resonant sound of a drum invokes four kinds of instruments representing the Four Symbols in Chinese astrology: the Azure Loong, the White Tiger, the Vermilion Bird, and the Black Tortoise. Each instrument symbolizes on…	202	1000162	11858	512	/@CNODDT	China National Opera & Dance Drama Theater 中国歌剧舞剧院	121000
Chinese traditional music	-OA8YIEo7is	2023-4-23	https://www.youtube.com/watch?v=-OA8YIEo7is	这首《桂枝香》好听到流泪Guizhixiang: Beautiful and sad tunes performed by Chinese instruments	《桂枝香》是自得琴社朝代系列音乐会音乐会《琴为何物·宋·水云归》的压轴曲目，倾诉了一段繁华落尽的故国往事，令许多观众动情而落泪。 登临送目，正故国晚秋，天气初肃。千里澄江似练，翠峰如簇。归帆去棹残阳里，背西风，酒旗斜矗。彩舟云淡，星河鹭起，画图难足。 念往昔，繁华竞逐，叹门外楼头，悲恨相续。千古凭高对此，谩嗟荣辱。六朝旧事随流水，但寒烟衰草凝绿。至今商女，时时犹唱，后庭遗曲。 ——《桂枝香·金陵怀古》宋·王安石 艺术总监/作曲：唐彬 管弦乐配器：田汨 周楚航 管弦乐录制：布达佩斯交响乐团 演奏：笛子 高雅、二胡 朱婧、古筝 俞辰瑶、琵琶 颜泽、古琴 白无瑕、大鼓 陈曦 调音师：梅卓、吴文隽 舞美设计：郑金启 灯光师：宫徵羽 多媒体：刘孟宸 舞台监督：王砾川、吴蔓妮、游家宁、刘瑷 化妆师：王乔叶、刘蕊 服装/礼仪：王俊涵 导播/剪辑/后期：邱诗浩 摄影师：王恩俊、袁红良、王东波 摄影助理：…	314	2957617	36255	1282	/@Zideqinshe	自得琴社 Zi De Guqin Studio	717000
Chinese classical music	MsDE1iWHbmc	2023-4-6	https://www.youtube.com/watch?v=MsDE1iWHbmc	【非常好听】▶⏺ 古箏笛子旋律史上最好听的，超好聽的中國古典音樂 放鬆解壓 | 中国音乐 纯音乐 冥想音樂 古典音乐 | 細膩地撫摸你的耳膜 Traditional Chinese Music	【非常好听】▶⏺ 古箏笛子旋律史上最好听的，超好聽的中國古典音樂 放鬆解壓 | 中国音乐 纯音乐 冥想音樂 古典音乐 | 細膩地撫摸你的耳膜 Traditional Chinese Music • 视频 ----------------------------------💢✨🎶🎵🪕🎻🎼---------------------------------------- 👉非常感謝收看。不要忘記點贊,評論這個視頻 👉請訂閱我的頻道按通知鈴每天聽輕鬆的音樂 感謝您一直陪伴頻道，如果您想收聽更優美輕鬆的音樂，可以到下面的鏈接收聽。 ♫ 播放列表：https://www.youtube.com/playlist?list... ♫【早上最適合聽的輕音樂】：https://www.youtube.com/playlist?list... ♫【薩克斯風輕音樂】：https://www.youtube.c…	4902	1342249	11683	312	/@TraditionalChineseMusic123	古典音樂 - Traditional Chinese Music	579000
Chinese classical music	R8OvrqYmXHc	2023-6-14	https://www.youtube.com/watch?v=R8OvrqYmXHc	墨缘/中国古典音乐/Chinese classical music /Çinli klasik müziği		271	1083688	4138	97	/@alicemao8782	MM毛毛走世界—分享美文、美猫、美乐、美食……	2,770
Chinese traditional music	JUMD4_KdKyw	2023-9-29	https://www.youtube.com/watch?v=JUMD4_KdKyw	3 HOUR of The Best Relaxing Music | Bamboo Flute | Meditation Music - Healing - Sleep Music	【非常好听】▶⏺ 最好的古箏古典歌曲，精選古箏曲 最好的古箏古典歌曲，幫助您放鬆和平靜心情 古筝古典音乐 你聽過最好聽的竹笛音樂 l 古典音樂 - Chinese Traditional Music • 【非常好听】▶⏺ 最好的古箏古典歌曲，精選古箏曲 最好的古箏古典歌曲，幫助您放鬆和平... ----------------------------------💢✨🎶🎵🪕🎻🎼---------------------------------------- 👉非常感謝收看。不要忘記點贊,評論這個視頻 👉請訂閱我的頻道按通知鈴每天聽輕鬆的音樂 感謝您一直陪伴頻道，如果您想收聽更優美輕鬆的音樂，可以到下面的鏈接收聽。 ♫ 播放列表：https://www.youtube.com/playlist?list... ♫【早上最適合聽的輕音樂】：https://www.youtube.com/pla…	13284	416329	3196	80	/@TraditionalChineseMusic123	古典音樂 - Traditional Chinese Music	579000
Chinese traditional music	C25tJkmYZSM	2024-1-22	https://www.youtube.com/watch?v=C25tJkmYZSM	Chinese New Year Traditional Music - Year of the Dragon 2024	Year of the Dragon 2024 - Chinese New Year Traditional Music Welcome to the world of Best Relaxing Music! 😇 🎵 More our relaxing music 👉 • Best Relaxing Music --- We ourselves make music for our videos on our channel, and our music is copyrighted. We do not provide a license to use our music, do not sell it, and do not allow it to be used. You can see a maximum of two ads in our videos in the firs…	8140	317818	2866	102	/@BRM	Best Relaxing Music	795000
Chinese traditional music	kztHOvmhHH8	2024-12-22	https://www.youtube.com/watch?v=kztHOvmhHH8	30分钟好听的古筝曲 30 minutes Instrumental Guzheng Music Chinese Traditional Music - Relaxing Study Music.	Here is a 30 minute collection of some beautiful melodies we played this year. Please enjoy ! Visit our website for guzheng and accessories purchase at https://www.austinguzheng.com chapters 0:00 不染 2:06 半山听雨 5:18 莫失莫忘 6:12 云水禅心 6:52 情深深雨濛濛 8:39 痴情冢 12:15 琵琶语 15:10 天下无双 17:21 兰亭序 18:57 女儿情 20:07 定风波 22:20 不染 24:29 烟雨唱扬州 26:21 月亮代表我的心 28:53 萱草花	1799	286577	4813	208	/@austinguzheng	Austin Guzheng Studio 望舒琴行	4,160
Chinese traditional music	hjQ0q6lz-pY	2024-1-25	https://www.youtube.com/watch?v=hjQ0q6lz-pY	Xian - Ancient Fantasy Journey - Epic Chinese Music for Focus, Motivation, Calm and Study	Embark on an focused journey to "Xian," a motivational ambient track that draws its essence from the ancient wonders of Xian. We've used traditional Chinese instruments like the erhu, guqin, guzheng, pipa, and dizi, and blended it with strings and epic drums. Xian, still stands as one of China's most ancient capitals, with a fascinating history dating back over 3,000 years. Everyone should know a…	3813	777904	13316	418	/@FantasyMeditations	Fantasy Meditations	99000
Chinese traditional music	0wA3jiMrAWg	2024-12-8	https://www.youtube.com/watch?v=0wA3jiMrAWg	Top Traditional Chinese Music | Relaxing Instrumental Chinese Music With Bamboo Flute, Guzheng, Erhu	Under the soft glow of the moonlight, '月下古韵' invites you on a tranquil journey through the heart of ancient Chinese music. In this video, we have curated a selection of the most captivating traditional melodies that embody the wisdom, beauty, and serenity of centuries-old Chinese culture. The sounds of the guzheng, erhu, pipa, and other classical instruments transport you to a time when music was…	11829	853343	10036	255	/@TopTraditionalChineseMusic-l8y	月下古韵 - Top Traditional Chinese Music	6,400
Chinese classical music	gtOSaCDl5Go	2024-2-8	https://www.youtube.com/watch?v=gtOSaCDl5Go	推荐50多岁以上的人真正喜欢的歌曲【老歌精選】 ♣ 100首70、80、90年代唱遍大街小巷的歌曲今天给大家推荐 ♣ , 林淑容 , 李茂山 , 千百惠 , 李茂山 .	推荐50多岁以上的人真正喜欢的歌曲【老歌精選】 ♣ 100首70、80、90年代唱遍大街小巷的歌曲今天给大家推荐 ♣ , 林淑容 , 李茂山 , 千百惠 , 李茂山 . 00:00:00 01. 葡萄成熟时 00:03:43 02. 恨你不回头 00:07:40 03. 情难守 00:11:34 04. 往事难追忆 00:15:06 05. 无言的结局 00:18:52 06. 对你怀念特别多 00:21:43 07. 星夜的离别 00:25:00 08. 三年 00:29:05 09. 梦在你怀中 00:32:55 10. 月光小夜曲 00:35:57 11. 往事只能回味 00:39:10 12. 默默盼歸期 00:42:29 13. 另一个结局 00:45:51 14. 难忘的初恋情人 00:49:15 15. 良夜不能留 00:52:43 16. 梨花泪 00:56:21 17.…	12364	954721	21391	92	/@heartwarmers9215	Heart Warmers	132000
Chinese traditional music	DocdTn2bi4M	2024-5-4	https://www.youtube.com/watch?v=DocdTn2bi4M	미려적신화(美丽的神话)- 신화OSTㅣ얼후(二胡) 아티스트 이비 커버ㅣEndless Love - The Myth	안녕하세요~ 봄의 기운이 무르익어 사랑이 넘치는 5월 입니다! 싱그러운 계절 아름다운 전라북도 익산에 가서 커버 촬영을 하였습니다. 아름다운 대나무길에 어울리는 음악 미려적신화를 커버하였습니다. 찾아주시는 분들에게 감사한 마음을 담아 연주하였습니다. 오늘도 좋은하루 되세요! It's May! the season of love! I took a cover shot on the beautiful bamboo road at Iksan, Jeollabuk-do, I worked on the music with gratitude to those who came. Have a good day! 原曲：美丽的神话（二胡） 喜欢我视频的朋友们欢迎分享并订阅本频道 ！ 多多点赞分享！评论区里记得给我留言^～^感谢你们！ ERHU ART…	252	1559296	26404	576	/@luyifeimusic	二胡 ERHU LUYIFEI	116000
Chinese traditional music	3pf_PXyt1Ik	2024-8-26	https://www.youtube.com/watch?v=3pf_PXyt1Ik	pov: you’re an ancient chinese scholar preparing for the imperial examination | study playlist	No copyright infringement intended. I do not own any of the songs in this playlist! Thanks for listening :D Tracklist: 0:00 The Rise of Fragrant Rice by Tian Mi, performed by Zi De Guqin Studio 8:00 High Mountain and Flowing Water by an anonymous ancient Zhejiang guzheng composer, performed by Mo Yun 11:38 Clear Reflections by Wang Jianan, performed by Lei Dianyun, Huang Kai, and Wang Na 16:38 Bi…	3869	927225	47780	1494	/@why_js	why_js	2,530
Chinese classical music	ys_fN3uy7bQ	2024-9-7	https://www.youtube.com/watch?v=ys_fN3uy7bQ	Eliminates All Negative Energy, Tibetan Healing Flute, Increases Mental Strength	消除所有负能量，藏疗笛，增强精神力量 --------------------------------- 欢迎来到内心的平静与冥想🌊 🍀 在我们的“内心平静与冥想”频道，我们邀请您踏上通往内心平静与幸福的旅程。深入了解我们精心策划的舒缓音乐、引导冥想和正念练习合集，旨在平静心灵、放松身体和滋养灵魂。无论您是想缓解压力、焦虑，还是只是想在漫长的一天后放松身心，我们的频道都为您提供了一个逃离日常生活喧嚣的庇护所。 🍀 我们易于聆听的内容专为营造宁静的氛围而量身定制，非常适合冥想、放松、瑜伽或只是在忙碌的一天中寻找片刻的慰藉。 🔔 如果您喜欢这个节目并想要更多轻松的音乐，请不要忘记订阅： / @innerpeaceandmeditationmusic --------------------------------- 您可以在我们的频道上找到什么？ 在我们的频道上，您可以找到适合以下用途的轻松…	14319	14097065	126992	1944	/@innerpeaceandmeditationmusic	Inner Peace and Meditation	244000
Chinese traditional music	HMS0nipwkC4	2025-10-30	https://www.youtube.com/watch?v=HMS0nipwkC4	Chang'an – Epic Ancient Chinese Music | Tang Dynasty Soundtrack for Study, Writing, DnD, RPG	Hey guys! Welcome to Chang'an, the legendary capital of the Tang Dynasty where emperors ruled from the Daming Palace and the Silk Road brought the world to China's doorstep. For this track we've used a lot of traditional Chinese instrumentation. We've got the guzheng, erhu, pipa, dizi, suona and bawu, and has been a blast to write for! Hopefully it's the perfect backdrop for study, meditation, wr…	3705	111302	3399	142	/@FantasyMeditations	Fantasy Meditations	99000
Chinese classical music	uqtFjrDwL1E	2025-5-12	https://www.youtube.com/watch?v=uqtFjrDwL1E	Deep Focus - Classical Music for Thinking	When your mind needs clarity and the world feels too loud, press play. This playlist is crafted to accompany deep thinking, writing, problem-solving, and those long stretches of uninterrupted focus. Featuring elegant piano lines, contemplative strings, and minimalist textures, it helps you enter a state of calm concentration — where ideas can flow freely and time gently fades away. Perfect for st…	8739	377883	5751	104	/@EssentialClassics	Essential Classics	405000
Chinese traditional music	tGyp2EZMjHA	2025-5-14	https://www.youtube.com/watch?v=tGyp2EZMjHA	Chinese Traditional Music Beneath a Thousand Blossoms | 花千樹下的傳統國樂: Dream of the Tang Dynasty 夢回千年盛唐	Dreaming of the Tang Dynasty — the eastern wind scatters the dazzling fireworks of the Lantern Festival, falling like traceless stardust. A night of dragon dances, with music flowing like water through lights and crowds. Guzheng, Guqin, Xiao, Erhu, and Pipa weave a poetic realm, painting a grand feast of elegance across a thousand years. 夢回盛唐，東風吹散了元宵夜的火樹銀花，散落后又如星雨無痕。一夜魚龍舞，樂聲如水流淌於燈火與人海之間。古箏、古琴、簫、二…	3878	320427	12175	153	/@Iwantmysoundheard	Deep Work and Study Music | 深度專注與學習音樂	9,130
Chinese traditional music	sJlIdUy24R4	2025-5-17	https://www.youtube.com/watch?v=sJlIdUy24R4	Bamboo flute &Guzheng for Peaceful Mind🌿| #deepsleep #relaxingmusic #flutemusic @soundtopeaceful	Welcome to Channel " Sound to Peaceful" 🌿Over an hour Pure Bamboo Flute, Erhu & Guzheng 🎵 | Best for Deep Sleep, Meditation & Stress Relief Music 🌙 Let the soothing sounds of Bamboo Flute, Erhu and Guzheng transport you to a world of peace and relaxation. This over an hour instrumental music is specially designed to help with deep sleep, stress relief, Relax and meditation. 🎶✨ This sounds are cre…	5973	1108304	17673	740	/@soundtopeaceful	Sound to Peaceful	314000
Chinese traditional music	nHHdGWMhtq4	2025-5-17	https://www.youtube.com/watch?v=nHHdGWMhtq4	Sound of Clarity – Uplifting Chinese Instrumental Music | 靈動古韻・專注提神之選	Let the rhythm of traditional Chinese instruments, combined with vibrant electronic beats and percussion, invigorate your mind and spirit. This collection blends ancient melodies with modern energy, creating a soundscape perfect for boosting focus, productivity, and energy. 從古箏、古琴到現代節奏的電子擊打樂，這場音樂之旅將傳統與現代完美結合，激發你的專注力與能量，讓思維更加清晰、沉浸在高效的工作與學習中。 🌿 Highlights: • Chinese Traditional Instruments: Guzheng…	1860	119526	2911	57	/@Iwantmysoundheard	Deep Work and Study Music | 深度專注與學習音樂	9,130
Chinese traditional music	-e18-AIQ94c	2025-5-18	https://www.youtube.com/watch?v=-e18-AIQ94c	🍃Chinese Zen Music| Bamboo flute, Erhu &Guzheng|#relaxingmusic #deepsleep #flute @soundtopeaceful	Welcome to Channel " Sound to Peaceful" 🌿Over an hour Pure Bamboo Flute, Erhu & Guzheng 🎵 | Best for Deep Sleep, Meditation & Stress Relief Music 🌙 Let the soothing sounds of Bamboo Flute, Erhu and Guzheng transport you to a world of peace and relaxation. This over an hour instrumental music is specially designed to help with deep sleep, stress relief, Relax and meditation. 🎶✨ original created by…	5825	1702094	32539	1232	/@soundtopeaceful	Sound to Peaceful	314000
Chinese traditional music	_CSUzrybSxM	2025-5-20	https://www.youtube.com/watch?v=_CSUzrybSxM	Calm Chinese Tea Music for Relaxation and Meditation Asian Instrumental Background	让舒缓的旋律将您带入宁静的茶馆，非常适合在漫长的一天后放松身心、深化您的冥想练习、增强学习时的专注力，或者仅仅是享受片刻的宁静。 这首温柔的亚洲器乐是专门为您缓解压力、寻找内心平静、营造平和氛围而精心打造的。美丽的画面与音乐相得益彰，邀请您放慢脚步，品味当下。 无论您是茶爱好者、正在练习正念，还是只是需要一个平静的逃离，这首音乐都适合您。 您觉得这首平静的音乐如何？请在下方评论区告诉我们！ 如果这个视频帮助您放松，请点赞👍——这真的支持了我们的频道！不要忘记与可能需要的朋友分享这份宁静，并订阅我们的频道，获取更多滋养心灵的平静音乐。 #chinesemusic #relaxingteamusic #meditationmusic #asianrelaxingmusic #calmmusic #instrumentalmusic #teatime #relaxation #meditati…	6390	404276	4873	115	/@RelaxAsiaEssence	Relax Asia Essence	7,330
Chinese traditional music	cjMN-IlMJdE	2025-6-12	https://www.youtube.com/watch?v=cjMN-IlMJdE	Ru Yang – Ancient Chinese Fantasy Music | Epic Cinematic OST for Study, Writing, DnD, RPG	Step into the legendary kingdom of Ru Yang, a land forged in rebellion and bound by unyielding honor, In this piece we've used the erhu, guzheng, pipa, dizi, and ancient Chinese percussion, layered with a cinematic orchestra and choir. Ru Yang was composed for focus, reading, writing, and worldbuilding—perfect for DnD sessions, fantasy storytelling, or immersive study. Let the music carry you thr…	240	231122	5549	127	/@FantasyMeditations	Fantasy Meditations	99000
Chinese traditional music	LDrj7-UYvrA	2025-6-15	https://www.youtube.com/watch?v=LDrj7-UYvrA	Soft Bamboo & Dizi Flute with Erhu for Relaxation, Sleep & Renewal @AmbientFriend	Close your eyes and let the soothing blend of soft bamboo flute and the expressive Erhu gently cradle your senses. Whether you're seeking calm focus, deep relaxation, or peaceful sleep, this music guide you on a tranquil journey.🌸 📌 Perfect For: • Meditation, mindfulness, and stress relief • Yoga, studying, or creating a calming ambiance • Helping you unwind before bedtime 📌Thank you so much for …	8580	1102491	11602	645	/@AmbientFriend	Traditional Instruments & Ambient Music	115000
Chinese traditional music	XM6SLSQqZDA	2025-6-2	https://www.youtube.com/watch?v=XM6SLSQqZDA	Traditional Chinese Music | Mesmerizing Guzheng, Pipa, Bamboo Flute & Erhu Performance 🎵✨[3MMusic]	#3MRelaxingMusic #3M #3MMusic #3MRelaxtion #3MSound 3M Relaxing Music|🌺 Mesmerizing Guzheng, Pipa, Bamboo Flute & Erhu Performance 🎵✨ For Stress Relief, Welcome to 3M Relaxing Music – peace Music and tranquility. 🎶✨ Immerse yourself in soothing melodies, Calming Chinese Music, and peaceful instrumentals designed to help you relax, meditate, sleep, or focus. Whether you're unwinding after a long d…	863	109943	1104	59	/@3MRelaxingMusic-j6m	3M Relaxing Music	1,550
Chinese traditional music	goXMyeYdh68	2025-6-25	https://www.youtube.com/watch?v=goXMyeYdh68	Soothing Melodies: Bamboo Flute & Erhu for Calm, Positive Energy	Surrender to a gentle oasis where mist-like flute whispers and warm Erhu tones embrace your senses. 🌙🍃 Let each soft breath of the Bamboo flute and each bowed caress of the Erhu wash over you like moonlit dew, melting away tension and inviting serene reflection. Ideal for drifting into deep sleep, restoring your energy, or simply pausing for a moment of mindful calm—this soothing soundscape will …	8949	114837	1202	59	/@AmbientFriend	Traditional Instruments & Ambient Music	115000
Chinese classical music	toJSZDrQ4qE	2025-8-17	https://www.youtube.com/watch?v=toJSZDrQ4qE	Chinese Zen Music🍃Guzheng, Erhu & Bamboo Flute for relaxation & stress relief @soundtopeaceful	Welcome to Channel " Sound to Peaceful" 🌿Over an hour Peaceful Bamboo Flute, Erhu & Guzheng Relaxing Music🎵 | Best for Deep Sleep, Meditation, Peaceful mind & Stress Relief 🌙 Let the soothing sounds of Bamboo Flute, Erhu and Guzheng transport you to a world of peace and relaxation. This over an hour instrumental music is specially designed to help with deep sleep, stress relief, relaxation and me…	7444	187416	2296	131	/@soundtopeaceful	Sound to Peaceful	314000
Chinese traditional music	DNLgt4y6bhs	2025-8-18	https://www.youtube.com/watch?v=DNLgt4y6bhs	The Ancient Chinese Suona – A Rare Musical Instrument Preserving Intangible Cultural Heritage	The Ancient Chinese Suona – A Rare Musical Instrument Preserving Intangible Cultural Heritage 🔹 Description: Discover the fascinating story of the suona, an ancient Chinese musical instrument celebrated for its powerful sound and cultural significance. As part of intangible cultural heritage, the suona continues to play an important role in traditional festivals, ceremonies, and musical performan…	140	140835	3956	40	/@TrendBlitzDaily	TrendBlitz Daily	215000
Chinese traditional music	czIC9-_4WMM	2025-8-29	https://www.youtube.com/watch?v=czIC9-_4WMM	Bamboo flute, erhu & Guzheng: Chinese Zen music | Relaxing Music @MoonlitMelodies-68s	Welcome to “Moonlit Melodies - Ancient Chinese Music”!! ❤ 🌙Let the soothing sounds of Bamboo Flute and Guzheng transport you to a world of peace and relaxation. This 2-hour instrumental music is specially designed to help with deep sleep, stress relief, and meditation. 🎶 🎧 Why Listen? ❤ Promotes deep relaxation & stress relief 💆‍♂️ ❤ Enhances sleep quality & insomnia relief 😴 ❤ Supports meditatio…	7554	630756	7298	358	/@MoonlitMelodies-68s	Moonlit Melodies - Ancient Chinese Music	264000
Chinese traditional music	rw39Uy-5mwY	2025-9-10	https://www.youtube.com/watch?v=rw39Uy-5mwY	Water Tranquility 水境 古琴 簫 | Ancient Chinese Guqin & Xiao Flute | Zen Meditation & Relaxation Music	霧深之處，天地無形。 音起之時，心念自止。 一人立於舟上， 不語，不動， 只是讓簫聲穿過濃霧， 落入水面與夜色之中。 此刻無需追尋、無需理解， 讓所有未說完的心事化入夜波， 讓未安定的念頭沉入霧後。 在聲音之外， 有更安靜的地方； 在呼吸之內， 有更柔軟的自己。 願你靜下來， 不求證悟， 只願安住。 When the mist grows deeper, the world becomes softer. When the Xiao begins, the mind grows still. Stand within the silence, and let every breath return to where it first began. Here, nothing must be solved, nothing must be reached. Only stay— and p…	1939	892663	18765	379	/@pass.through	穿越而過	194000
Chinese traditional music	e-q1Zpu95gs	2025-9-16	https://www.youtube.com/watch?v=e-q1Zpu95gs	Soothing Chinese Tea Music for Deep Relaxation & Mindful Meditation | Asian Flute	沉浸在这美妙的中国茶乐系列中，体验宁静的安详🍵。本视频专为深度放松和正念冥想而设计，以平静的亚洲长笛旋律融合了轻柔的自然之声。让宁静的氛围将您带入内心的平静和静谧的沉思状态。✨ 这段茶乐之旅是您舒缓压力的完美伴侣，无论是漫长一天后的放松，还是在学习和工作时集中注意力。宁静的旋律和微妙的自然声景创造了一个理想的环境，有助于培养内心平静，减轻焦虑，并改善睡眠质量。通过声音体验中国茶文化的古老智慧。🧘‍♀️ 聆听亚洲音乐时，什么让您感到最放松？您更喜欢用乐器声音还是环境自然声来冥想？请在下方评论中分享您的想法，并告诉我们您来自哪里！我们喜欢听到来自全球各地的朋友。👇 如果您喜欢这次宁静的体验，请考虑点赞视频并订阅Relax Asia Essence，获取更多亚洲音乐、深度放松和正念冥想内容。您的支持帮助我们为您创造更多宁静之旅。💖 Relax Asia Essence提供了一个宁静的避风港，提…	10816	109165	844	23	/@RelaxAsiaEssence	Relax Asia Essence	7,330
Chinese traditional music	0ebsbln62ZU	2025-9-17	https://www.youtube.com/watch?v=0ebsbln62ZU	Chinese Zen Music: Bamboo flute, Erhu & Guzheng | Soothing Music @MoonlitMelodies-68s	Welcome to “Moonlit Melodies - Ancient Chinese Music”!! ❤ 🌙Let the soothing sounds of Bamboo Flute and Guzheng transport you to a world of peace and relaxation. This 2-hour instrumental music is specially designed to help with deep sleep, stress relief, and meditation. 🎶 🎧 Why Listen? ❤ Promotes deep relaxation & stress relief 💆‍♂️ ❤ Enhances sleep quality & insomnia relief 😴 ❤ Supports meditatio…	7219	2033900	30998	1296	/@MoonlitMelodies-68s	Moonlit Melodies - Ancient Chinese Music	264000
Chinese classical music	SNVtLg-uI70	2025-9-5	https://www.youtube.com/watch?v=SNVtLg-uI70	Chinese Zen Music: Bamboo flute, Erhu & Guzheng | Deep Sleep @MoonlitMelodies-68s	Welcome to “Moonlit Melodies - Ancient Chinese Music”!! ❤ 🌙Let the soothing sounds of Bamboo Flute and Guzheng transport you to a world of peace and relaxation. This 2-hour instrumental music is specially designed to help with deep sleep, stress relief, and meditation. 🎶 🎧 Why Listen? ❤ Promotes deep relaxation & stress relief 💆‍♂️ ❤ Enhances sleep quality & insomnia relief 😴 ❤ Supports meditatio…	7573	360257	4918	279	/@MoonlitMelodies-68s	Moonlit Melodies - Ancient Chinese Music	264000

## Sheet: Original Video Comments
Comment Content_Cleaning	Comment Content_Original	Character count	Word count	Video ID	Comment ID	Comment Poster ID	Comment ID	Comment Posting Time	Number of comments replied to	Language Type	Number of Likes on Comments
I loved these performers, they soak themselves into the mood of this music, which made it even more livelier.Look at their facial expression. Their heart even singing along with the music they were playing.	I loved these performers, they soak themselves into the mood of this music, which made it even more livelier.Look at their facial expression. Their heart even singing along with the music they were playing.	206	34	Lykgg5phVJE	Blossoms on a Moonlit River in Spring | 春江花月夜	f16f92ee5428000606218f6294b3165b	@luckystarshop6768	2025-12-10T00:06:50Z	1	en	4
Where winds meet Reverly hall	Where winds meet Reverly hall	29	5	Lykgg5phVJE	Blossoms on a Moonlit River in Spring | 春江花月夜	659c02f571adaa26bc71d58382ec2a00	@Pocarisw	2025-12-09T23:09:44Z	0	en	3
This music are the blossoms thar whispers in the soft wind.	This music are the blossoms thar whispers in the soft wind.	59	11	Lykgg5phVJE	Blossoms on a Moonlit River in Spring | 春江花月夜	9dfd92d2a1f043269a272de12d4687bb	@hanbaars	2025-11-23T10:42:39Z	1	en	1
God is love. He sent his only son Jesus to save us from hell by suffering and dying on the cross to pay for our sins. (We rebelled against God, our creator, in our past.) Read the Gospel and the Bible; then you'll know. God loves us immensely. He'll raise us from death. He's created a new and better world for us. Tell Jesus all your problem. He's helped me a lot. He can help you, too.	God is love. He sent his only son Jesus to save us from hell by suffering and dying on the cross to pay for our sins. (We rebelled against God, our creator, in our past.) Read the Gospel and the Bible; then you'll know. God loves us immensely. He'll raise us from death. He's created a new and better world for us. Tell Jesus all your problem. He's helped me a lot. He can help you, too.	387	77	Lykgg5phVJE	Blossoms on a Moonlit River in Spring | 春江花月夜	05216f002ffd50fabcf296b27b6e30de	@antlau3272	2025-09-08T03:47:10Z	0	en	5
5:005:305:50	5:005:305:50	12	3	Lykgg5phVJE	Blossoms on a Moonlit River in Spring | 春江花月夜	d99a652e4e4c21aedb7f220d93854ea3	@noemirio	2025-09-04T10:46:34Z	0	en	1
From Canada ... I like this music	From Canada ... I like this music	33	5	Lykgg5phVJE	Blossoms on a Moonlit River in Spring | 春江花月夜	6dc9ffdc06d641abf45f63345175f7d0	@briankerr4512	2025-08-04T19:19:19Z	0	en	6
love from america	love from america	17	3	Lykgg5phVJE	Blossoms on a Moonlit River in Spring | 春江花月夜	4f3396d0a1f49470d9aacf45ade596b5	@calebmorris9265	2025-08-03T02:08:53Z	0	en	4
Perfect, Excellent, Fantastic! Love from India.	Perfect, Excellent, Fantastic! Love from India.	47	6	Lykgg5phVJE	Blossoms on a Moonlit River in Spring | 春江花月夜	9b0de5d0baa3b8a292d6c1bd288fe843	@shejoinasu	2025-07-12T09:25:59Z	0	en	4
Great great music this is our tradition civilizations, no match love China	Great great music this is our tradition civilizations, no match love China❤	74	12	Lykgg5phVJE	Blossoms on a Moonlit River in Spring | 春江花月夜	00c4d4935f120a3dcc7f2b386b45c221	@samh9044	2025-06-09T23:13:45Z	0	en	2
make china great again	make china great again	22	4	Lykgg5phVJE	Blossoms on a Moonlit River in Spring | 春江花月夜	0d6520406c4767c3aade9c27098e8320	@francistremblay8098	2025-05-04T16:32:31Z	0	en	9
Music from a time when China was actually China, not a Soviet wanna be country. An absolute masterpiece.	Music from a time when China was actually China, not a Soviet wanna be country. An absolute masterpiece.	104	16	Lykgg5phVJE	Blossoms on a Moonlit River in Spring | 春江花月夜	085fbfba1eb6fdc5f1eb9bad48279290	@AtomicVisionary	2025-04-28T03:35:04Z	2	en	17
Very nice! In which year was this filmed?	Very nice! In which year was this filmed?	41	8	Lykgg5phVJE	Blossoms on a Moonlit River in Spring | 春江花月夜	841aa67024a0851902595950ddcae8f1	@dbadagna	2025-04-02T02:58:01Z	4	en	7
they was playing so hard the video started glitching	6:25 they was playing so hard the video started glitching	52	9	Lykgg5phVJE	Blossoms on a Moonlit River in Spring | 春江花月夜	65eaa419df0320288da15fbbf46e490e	@n0tce228	2025-03-18T20:17:16Z	0	en	5
Almost 10 million views	Almost 10 million views	23	4	Lykgg5phVJE	Blossoms on a Moonlit River in Spring | 春江花月夜	ae2f2cb05d0d7cfc001c1fea230c40f8	@flickrebeat8936	2025-02-19T23:15:30Z	0	en	5
For my first great granddaughter whose is Blossom.	For my first great granddaughter whose is Blossom.	50	8	Lykgg5phVJE	Blossoms on a Moonlit River in Spring | 春江花月夜	4ec85c11a187f9de7e1e1b3ffd5afd7b	@connor14ification	2025-01-20T03:35:19Z	0	en	6
This music brings me to tears - absolutely moving! Heard this tune in many Chinese dramas but never knew it's called 春江花月夜. I was born in China long ago but grown up in the U.S. Many thanks to the performers - true artists.	This music brings me to tears - absolutely moving! Heard this tune in many Chinese dramas but never knew it's called 春江花月夜. I was born in China long ago but grown up in the U.S. Many thanks to the performers - true artists.	223	43	Lykgg5phVJE	Blossoms on a Moonlit River in Spring | 春江花月夜	13d16a041b35b582185093d656047baa	@katieludlum4240	2024-12-17T14:42:31Z	1	en	11
I heard from time to time. perform very well. Nice and Wonderful	I heard from time to time. perform very well. Nice and Wonderful	64	11	Lykgg5phVJE	Blossoms on a Moonlit River in Spring | 春江花月夜	d71466b7c756e2de4905970c01fddb17	@datyeung6821	2024-11-02T20:07:22Z	0	en	6
This reminds me of Wano, One Piece	This reminds me of Wano, One Piece	34	7	Lykgg5phVJE	Blossoms on a Moonlit River in Spring | 春江花月夜	195951e9885293d8e60d7287562230db	@mwhd441	2024-10-26T03:37:04Z	0	en	3
Always enjoy these classical music and would like to congratulate all the musicians playing such lovely tune so astounding to hear lovely tune forever green indeed.	Always enjoy these classical music and would like to congratulate all the musicians playing such lovely tune so astounding to hear lovely tune forever green indeed.	164	26	Lykgg5phVJE	Blossoms on a Moonlit River in Spring | 春江花月夜	de02580860be944af15789712e4c07c1	@patrickyeo1235	2024-10-16T04:42:39Z	0	en	7
I love the rising tempo that climaxes with a string snapping in one of the instrument. Did u notice it?	I love the rising tempo that climaxes with a string snapping in one of the instrument. Did u notice it?	103	17	Lykgg5phVJE	Blossoms on a Moonlit River in Spring | 春江花月夜	d4c8464cdde812a0b6684c02ac9538f1	@deepone5005	2024-10-12T05:53:56Z	0	en	7
The music of a highly civilised culture.	The music of a highly civilised culture.	40	6	Lykgg5phVJE	Blossoms on a Moonlit River in Spring | 春江花月夜	02c93253d8b69921c31fde9d3df65848	@deepone5005	2024-10-12T05:51:49Z	2	en	11
Evergreen, always refreshing, yet harks back to a time in a distant past! Soul appeasing music.	Evergreen, always refreshing, yet harks back to a time in a distant past! Soul appeasing music.	95	14	Lykgg5phVJE	Blossoms on a Moonlit River in Spring | 春江花月夜	d1267ee133b460dd1197adf9c6115eea	@deepone5005	2024-10-12T05:49:29Z	0	en	5
One of the oldest YouTube videos in history. Such a beautiful song as well!	One of the oldest YouTube videos in history. Such a beautiful song as well!	75	13	Lykgg5phVJE	Blossoms on a Moonlit River in Spring | 春江花月夜	fd53c6eb8d5fa33c7801bb9fdd4d10dd	@LiamWnsr	2024-09-26T00:15:18Z	0	en	7
This gave me chills and made me tear up a bit. So beautiful.	This gave me chills and made me tear up a bit. So beautiful.	60	12	Lykgg5phVJE	Blossoms on a Moonlit River in Spring | 春江花月夜	94fbd2207a0eb72acac6bde97d42f8fe	@KvetaEvans	2024-09-22T20:06:01Z	1	en	5
chinese and japanese music are the best	chinese and japanese music are the best	39	7	Lykgg5phVJE	Blossoms on a Moonlit River in Spring | 春江花月夜	3681baae47ced4db53c251b3d723612a	@zeibeats	2024-09-21T20:14:13Z	0	en	3
The woman in white playing the pipa is smoking	The woman in white playing the pipa is smoking 🔥 🔥 🔥	46	9	Lykgg5phVJE	Blossoms on a Moonlit River in Spring | 春江花月夜	fad0d2c56a1aa87c120f4b8b682d022b	@stephenamato918	2024-08-12T02:59:03Z	2	en	4
There is commercial in the middle? F**K!	There is commercial in the middle? F**K!	40	6	Lykgg5phVJE	Blossoms on a Moonlit River in Spring | 春江花月夜	e667b6ffe5fd78f71b4a6cd1dc618378	@supertubeuser	2024-08-02T02:41:17Z	0	en	3
I can help you with clean air if you help me now.	I can help you with clean air if you help me now.	49	11	Lykgg5phVJE	Blossoms on a Moonlit River in Spring | 春江花月夜	aaf163fc8a6dc28a8a09496330201807	@mikevogel8698	2024-07-30T22:46:26Z	0	en	4
i will never forget this song	i will never forget this song 😊❤🎉	29	5	Lykgg5phVJE	Blossoms on a Moonlit River in Spring | 春江花月夜	2fba4f88bd275d6bdb224f3529576378	@jimmyshen746	2024-07-28T00:26:15Z	1	en	6
Wow beautiful music and i am from Chennai ( india)	Wow beautiful music and i am from Chennai ( india)	50	8	Lykgg5phVJE	Blossoms on a Moonlit River in Spring | 春江花月夜	d34e26a3cd0d72b41872bfd83e6f73dc	@positivevibess07	2024-07-14T07:03:54Z	0	en	2
Beautiful music, thank you for that. I am from Australia.	Beautiful music, thank you for that. I am from Australia.	57	9	Lykgg5phVJE	Blossoms on a Moonlit River in Spring | 春江花月夜	35146b103766b357d7b6e3ea3a4e2230	@frederickdeboer1769	2024-06-18T07:12:00Z	0	en	8
Very satisfied music to listen.	Very satisfied music to listen.	31	5	Lykgg5phVJE	Blossoms on a Moonlit River in Spring | 春江花月夜	77c20469666143a3a80fed6c1d947da3	@tankay862	2024-06-01T00:50:08Z	0	en	4
Glad we feel same about various groups of people. Will not accept the bs any longer. You don't feed a beautiful harvest to animals.	Glad we feel same about various groups of people. Will not accept the bs any longer. You don't feed a beautiful harvest to animals.	131	23	Lykgg5phVJE	Blossoms on a Moonlit River in Spring | 春江花月夜	6be083e3808b82e56dc416d70a7b4f97	@mikevogel8698	2024-05-03T22:04:31Z	0	en	0
The best version	The best version	16	3	Lykgg5phVJE	Blossoms on a Moonlit River in Spring | 春江花月夜	e853896ada868546edb8196ed24f6554	@elau778	2024-01-31T16:11:20Z	0	en	5
one of the best copies.	one of the best copies.	23	5	Lykgg5phVJE	Blossoms on a Moonlit River in Spring | 春江花月夜	ece13f5b6dfd129e6727ba4feafff58c	@mikelaw9872	2024-01-24T11:34:51Z	0	en	5
Watching this video on January 16, 2024.	Watching this video on January 16, 2024.	40	7	Lykgg5phVJE	Blossoms on a Moonlit River in Spring | 春江花月夜	255050f08afb91765ce75f39396284f0	@ABab-jf2jb	2024-01-16T22:53:36Z	3	en	8
I can't wait to come home.	I can't wait to come home.	26	5	Lykgg5phVJE	Blossoms on a Moonlit River in Spring | 春江花月夜	40242ef550aa6e9674305811362a3b94	@mikevogel8698	2024-01-14T04:01:51Z	0	en	2
The music was sent from heaven, so beautiful and relaxing......	The music was sent from heaven, so beautiful and relaxing......	63	10	Lykgg5phVJE	Blossoms on a Moonlit River in Spring | 春江花月夜	806f87e88625e2a862661259223bc838	@RichardHofman333	2023-12-29T04:49:25Z	0	en	7
Is it me, or are the Chinese clone girls missing something that theese imperial queens aren't giving up?	Is it me, or are the Chinese clone girls missing something that theese imperial queens aren't giving up?	104	18	Lykgg5phVJE	Blossoms on a Moonlit River in Spring | 春江花月夜	ca434a6a8d338ef286c7a4e411112b2c	@mikevogel8698	2023-11-04T00:30:41Z	1	en	2
From Los Angeles excellent second to none.	From Los Angeles excellent second to none.	42	7	Lykgg5phVJE	Blossoms on a Moonlit River in Spring | 春江花月夜	fe40c36100dfaaff670c73b2a2f1d245	@MARCUSLAU-w8b	2023-10-17T04:27:04Z	0	en	6
one of the best Chinese music ever written.	one of the best Chinese music ever written.	43	8	Lykgg5phVJE	Blossoms on a Moonlit River in Spring | 春江花月夜	043988693d1a91ebd39d36dfceee82fd	@wengAndreLZQ	2023-10-04T12:55:49Z	0	en	10
/30. * 0334 hrs. hut house homework !Electronical Computer Search Satellite Radar Frequency !ChingYi L.M.Kok LuenMow ( Aug.1955s. SINGAPORE )	2023-9-6/30. * 0334 hrs. hut house homework !Electronical Computer Search Satellite Radar Frequency !ChingYi L.M.Kok LuenMow ( Aug.1955s. SINGAPORE )	141	18	Lykgg5phVJE	Blossoms on a Moonlit River in Spring | 春江花月夜	eb2fdc48146820e0ae90f14d0b6b09d0	@ChingYiKok	2023-09-30T01:38:42Z	0	en	0
Just beautiful. All the instruments were well balanced delivering a most pleasing orchestration of different sounds.	Just beautiful. All the instruments were well balanced delivering a most pleasing orchestration of different sounds.	116	15	Lykgg5phVJE	Blossoms on a Moonlit River in Spring | 春江花月夜	f1a3850cb66eb61643739dded21be9bc	@unikreations2258	2023-09-09T20:02:59Z	0	en	7
wonderful playig beautiful sound!	wonderful playig beautiful sound!	33	4	Lykgg5phVJE	Blossoms on a Moonlit River in Spring | 春江花月夜	791cd5ab1c09972fcc9432fd37254a52	@20majza	2023-09-02T06:08:29Z	0	en	4
Who's the woman who played the Chinese flute	Who's the woman who played the Chinese flute	44	8	Lykgg5phVJE	Blossoms on a Moonlit River in Spring | 春江花月夜	8843152df2431d3323f75e1615ec674e	@KateFlores_30	2023-08-27T13:48:05Z	6	en	5
Beautiful Chinese Song	Beautiful Chinese Song	22	3	Lykgg5phVJE	Blossoms on a Moonlit River in Spring | 春江花月夜	156a881961ec732aa82320e3c065e2ab	@timoteopanuerapuma6550	2023-08-15T17:35:26Z	0	en	3
Very nice music	Very nice music	15	3	Lykgg5phVJE	Blossoms on a Moonlit River in Spring | 春江花月夜	ef0c98b481853edb2d66c7c630ed6a30	@kimlengtay2102	2023-08-04T09:35:20Z	0	en	5
A tune that's been around for many years, gotta be good. This is in the standard repretoire of all Chinese ensembles.	A tune that's been around for many years, gotta be good. This is in the standard repretoire of all Chinese ensembles.	117	20	Lykgg5phVJE	Blossoms on a Moonlit River in Spring | 春江花月夜	e79099d01a2dab63affc24657f450f16	@sammo3969	2023-08-01T19:58:28Z	0	en	3
I can never get enough of wonderful Asian music . Very relaxing and soothing sounds. Thank you for sharing .	I can never get enough of wonderful Asian music . Very relaxing and soothing sounds. Thank you for sharing .	108	17	Lykgg5phVJE	Blossoms on a Moonlit River in Spring | 春江花月夜	96b94c905c05d3e33d29680489e267f4	@roberthughes5511	2023-05-26T14:13:37Z	0	en	13
May 23, 2023.	May 23, 2023.	13	3	Lykgg5phVJE	Blossoms on a Moonlit River in Spring | 春江花月夜	45583a08d3f90aec20ea70807771c518	@ttchiam5604	2023-05-23T06:26:46Z	1	en	2
May 22, 2023	May 22, 2023	12	3	Lykgg5phVJE	Blossoms on a Moonlit River in Spring | 春江花月夜	56d86f15ec7e54a42092d9bcbe4279c3	@tangwong9542	2023-05-22T12:59:01Z	0	en	2
The title should be "Blossoms on a Moonlit River in a Spring Night"	The title should be "Blossoms on a Moonlit River in a Spring Night"	67	11	Lykgg5phVJE	Blossoms on a Moonlit River in Spring | 春江花月夜	ba3c76ca4e99d417195859fcf566b667	@fanhua69	2023-05-16T19:18:09Z	1	en	3
Beautiful.watching on 29/4/23	Beautiful.watching on 29/4/23	29	5	Lykgg5phVJE	Blossoms on a Moonlit River in Spring | 春江花月夜	44004e4e53ad9bdfbc7bb6901592c3b2	@classicalmah8585	2023-04-29T08:53:01Z	0	en	3
It's everything so beautiful, the music, their clothes, their looks. Really wonderful.	It's everything so beautiful, the music, their clothes, their looks. Really wonderful.	86	12	Lykgg5phVJE	Blossoms on a Moonlit River in Spring | 春江花月夜	1f9db4d2a191667980343cf301f7c8ef	@dreamweaver221	2023-04-25T01:08:32Z	0	en	7
My best friend, Enjoyed watching this video my friend Really awesome views Thank you Stay connected	My best friend, Enjoyed watching this video my friend Really awesome views Thank you Stay connected	99	16	Lykgg5phVJE	Blossoms on a Moonlit River in Spring | 春江花月夜	c2824097e9adabdacb16b53896c0d5cc	@ponyrang	2023-03-30T00:26:07Z	0	en	7
This is the music played inside a really good Chinese restaurant in my city.	This is the music played inside a really good Chinese restaurant in my city.	76	13	Lykgg5phVJE	Blossoms on a Moonlit River in Spring | 春江花月夜	5aeb0584229f156203ade2743ded476f	@Oldman808	2023-02-11T14:32:02Z	0	en	8
Thank you for uploading this beautiful performance. I am imagining myself in the palace during the ancient time listening to this performance. It's amazing how people in the past could enjoy this sort of music.	Thank you for uploading this beautiful performance. I am imagining myself in the palace during the ancient time listening to this performance. It's amazing how people in the past could enjoy this sort of music.	210	34	Lykgg5phVJE	Blossoms on a Moonlit River in Spring | 春江花月夜	9a82652d769de684ba4bb033a3fad1a4	@ListerTube	2023-02-11T10:56:51Z	0	en	9
I’m curious does anyone know the history behind this piece? When and where in China was it written? For who?	I’m curious does anyone know the history behind this piece? When and where in China was it written? For who?	108	19	Lykgg5phVJE	Blossoms on a Moonlit River in Spring | 春江花月夜	86a38541b8bb212ddd168aa77f7254a3	@sunflowernova5915	2023-01-15T04:32:15Z	3	en	6
Incredibly and astonishingly beautiful. How i hope i might witness this someday.	Incredibly and astonishingly beautiful. How i hope i might witness this someday.	80	10	Lykgg5phVJE	Blossoms on a Moonlit River in Spring | 春江花月夜	6c975663723bad07d02dc8bb77689a5d	@SriOrshu	2023-01-10T02:33:39Z	0	en	5
So many talented womans	So many talented womans	23	4	Lykgg5phVJE	Blossoms on a Moonlit River in Spring | 春江花月夜	359a2fed32a638f4e67fcb26b98a825d	@kiranmagar7744	2023-01-04T18:55:34Z	0	en	8
I have instantly fall in love with this music, Feelings and passion pour!!!	I have instantly fall in love with this music, Feelings and passion pour!!!	75	12	Lykgg5phVJE	Blossoms on a Moonlit River in Spring | 春江花月夜	efb86f9925021e65a2ec80f1734c3b3b	@micamika8844	2023-01-03T17:06:55Z	0	en	9
WISH you a God health for ArtiesArties beautyfull2 madollin super power RECORD attempt slideshow previous version of this or any other menu start hot wowaenni Exsucuve bud2 nation2 public jenious2 material all women ladies off man man Dedyhand hand off Harmony Asia Pasific Uni-Eropa antlantic perparticion God internasional tube one more family2 milion2 konsewenshy public Agresive Restoran Medikal…	WISH you a God health for ArtiesArties beautyfull2 madollin super power RECORD attempt slideshow previous version of this or any other menu start hot wowaenni Exsucuve bud2 nation2 public jenious2 material all women ladies off man man Dedyhand hand off Harmony Asia Pasific Uni-Eropa antlantic perparticion God internasional tube one more family2 milion2 konsewenshy public Agresive Restoran Medikal…	486	71	Lykgg5phVJE	Blossoms on a Moonlit River in Spring | 春江花月夜	87e191af4df407232658bf2157b4f226	@basudewa2523	2022-12-27T10:31:32Z	0	en	5
This is something really special.	This is something really special.	33	5	Lykgg5phVJE	Blossoms on a Moonlit River in Spring | 春江花月夜	102cb7112d6d746fa826aa3b3e079229	@archangel15	2022-12-04T00:48:27Z	0	en	10
Wow, My best friend, OMG! So wonderful! I really love this! Thank you so much!	Wow, My best friend, OMG! So wonderful! I really love this! Thank you so much!	78	14	Lykgg5phVJE	Blossoms on a Moonlit River in Spring | 春江花月夜	d76ab7a7eb030b0a59e29898ca4d16af	@koreanature	2022-11-14T07:12:35Z	0	en	12
This kind of sound brings to mind infinite emotions when listening several times.	This kind of sound brings to mind infinite emotions when listening several times.	81	13	Lykgg5phVJE	Blossoms on a Moonlit River in Spring | 春江花月夜	3183ec2e2dd1e7fbc034d9bffb31b6e8	@emiliosoto5912	2022-10-29T17:46:16Z	0	en	11
Hello mario here, What very very very nice music you all make together .Gr mario	Hello mario here, What very very very nice music you all make together .Gr mario	80	15	Lykgg5phVJE	Blossoms on a Moonlit River in Spring | 春江花月夜	255e9bc792d65258b45e2dafd3aa907d	@mariosoeters69	2022-10-11T18:05:53Z	0	en	2
Lovely 10/10	Lovely 10/10	12	3	Lykgg5phVJE	Blossoms on a Moonlit River in Spring | 春江花月夜	7b83c1ebf120c0df698dd770d0c6c102	@suelarkin4815	2022-10-06T03:14:40Z	0	en	1
BRAVOCLAP CLAP CLAP. !!I use to listen to this music in the 50' when as a young person.And it always bring back old memories,sad it may be, but still good old memories.Love it !!If i am not mistaken it was composed during theMING DYNASTY .Thank you	BRAVOCLAP CLAP CLAP. !!I use to listen to this music in the 50' when as a young person.And it always bring back old memories,sad it may be, but still good old memories.Love it !!If i am not mistaken it was composed during theMING DYNASTY .Thank you	248	46	Lykgg5phVJE	Blossoms on a Moonlit River in Spring | 春江花月夜	56bb2c3d02a92c188a51b421a1600f9d	@putianren	2022-09-27T17:17:35Z	1	en	9
Wonderfull ...de Chile .	Wonderfull ...de Chile .	24	3	Lykgg5phVJE	Blossoms on a Moonlit River in Spring | 春江花月夜	b48cf9a80683d6b6fef847e73b78ac9e	@susanacuevas9637	2022-09-25T14:30:41Z	0	en	5
What year was the Tang Dynasty?	What year was the Tang Dynasty?	31	6	Lykgg5phVJE	Blossoms on a Moonlit River in Spring | 春江花月夜	a59cddafe09efdb220da615eb3af7208	@S7YXX	2022-08-02T05:20:47Z	2	en	0
All-ladies band can play this amazingly beautuful music. So impressive!	All-ladies band can play this amazingly beautuful music. So impressive!	71	11	Lykgg5phVJE	Blossoms on a Moonlit River in Spring | 春江花月夜	7a3a441d6c3e9b44522d994e79323b4e	@haniahannslew4108	2022-07-28T05:00:49Z	0	en	12
pleasant to hear	pleasant to hear	16	3	Lykgg5phVJE	Blossoms on a Moonlit River in Spring | 春江花月夜	d207ceb771d05c2dbd50f5ba98d34e88	@kennycheung2985	2022-07-23T03:19:21Z	0	en	4
Matchless great music and great china	Matchless great music and great china	37	6	Lykgg5phVJE	Blossoms on a Moonlit River in Spring | 春江花月夜	a95ea4248124c0c052235abeafdbda2a	@samh9044	2022-06-22T23:14:01Z	0	en	6
@hacona This performance was at the Wiener Musikverein'Viennese Music Association"Musikverein in Vienna, Austria...home of the Vienna Philharmonic Orchestra!!!!	@hacona This performance was at the Wiener Musikverein'Viennese Music Association"Musikverein in Vienna, Austria...home of the Vienna Philharmonic Orchestra!!!!https://en.wikipedia.org/wiki/Musikverein	160	21	Lykgg5phVJE	Blossoms on a Moonlit River in Spring | 春江花月夜	07b0c09b1fd4bd2daf324d3c0e197408	@flungingpictures	2022-05-30T06:38:47Z	0	en	6
This is a fuckin banger	This is a fuckin banger	23	4	Lykgg5phVJE	Blossoms on a Moonlit River in Spring | 春江花月夜	977f6e4db7cb2b81b742cd0a88e89835	@blowcreems	2022-05-28T23:54:05Z	0	en	2
this is the best copy.	this is the best copy.	22	5	Lykgg5phVJE	Blossoms on a Moonlit River in Spring | 春江花月夜	2c9208c43b869267388e0cadadbeea43	@mikelaw9872	2022-05-14T12:44:17Z	0	en	4
This has always been my favorite piece of ancient Chinese music, showcasing most of the instruments: pipa lute, ruan round lutes, yangqin, guzheng played with fingernails on the silk strings and hand strikes on the body to get a drum imitation, xiao flute, small percussion instruments and small gong carillion,. Just lovely to listen to again and again and fly away in imagination.	This has always been my favorite piece of ancient Chinese music, showcasing most of the instruments: pipa lute, ruan round lutes, yangqin, guzheng played with fingernails on the silk strings and hand strikes on the body to get a drum imitation, xiao flute, small percussion instruments and small gong carillion,. Just lovely to listen to again and again and fly away in imagination.	382	62	Lykgg5phVJE	Blossoms on a Moonlit River in Spring | 春江花月夜	af6d14fca64e7a5b228d335f3b40569a	@Lileyflor	2022-04-26T17:17:23Z	3	en	12
Just discovered this by accident and oh my god it is so beautiful <3 Thank you for the blessed music!	Just discovered this by accident and oh my god it is so beautiful <3 Thank you for the blessed music!	101	19	Lykgg5phVJE	Blossoms on a Moonlit River in Spring | 春江花月夜	a8b1fc448416e0a8180563dae3ff77c1	@kelcamer	2022-04-08T04:30:11Z	0	en	22
Asian people know how to do good music.	Asian people know how to do good music.	39	8	Lykgg5phVJE	Blossoms on a Moonlit River in Spring | 春江花月夜	4aee09a3d5ee26be6cc016b9da85685d	@Nyck461	2022-03-12T03:21:59Z	1	en	16
Is this performance entirely made up of women? Amazingly soothing performance and beautiful musicians.	Is this performance entirely made up of women? Amazingly soothing performance and beautiful musicians.	102	14	Lykgg5phVJE	Blossoms on a Moonlit River in Spring | 春江花月夜	3bac853dc7e02f5ba81971bef9374f43	@dscott1699	2022-03-10T04:10:53Z	0	en	15
Is okay if I like Chinese culture, but I'm American? Everything about this video is beautiful.	Is okay if I like Chinese culture, but I'm American? Everything about this video is beautiful.	94	14	Lykgg5phVJE	Blossoms on a Moonlit River in Spring | 春江花月夜	ff1a6bed50faa16556707335ec544c82	@ColorMeHoppy	2022-03-08T16:43:35Z	5	en	18
Pipa takes your spirit to a different level	Pipa takes your spirit to a different level 😁	43	7	Lykgg5phVJE	Blossoms on a Moonlit River in Spring | 春江花月夜	ea9858d1256ef11229ccb0a6fa2a0e4d	@CensoredSheepChannel	2022-02-25T08:57:55Z	2	en	9
I have never seen they rush music	I have never seen they rush music	33	6	Lykgg5phVJE	Blossoms on a Moonlit River in Spring | 春江花月夜	088c90f9249ea7c550af755afab2b1c5	@henrystickmangaming	2022-01-29T11:56:10Z	2	en	8
Awesomely joyful calm gentle and gracious	Awesomely joyful calm gentle and gracious	41	6	Lykgg5phVJE	Blossoms on a Moonlit River in Spring | 春江花月夜	33d91b9ba987e18559e1861adcd43f5f	@hoekoktong9099	2022-01-25T11:36:51Z	0	en	6
I really really love that flute. What is it called?	I really really love that flute. What is it called?	51	9	Lykgg5phVJE	Blossoms on a Moonlit River in Spring | 春江花月夜	819fa11ac38c4a0191883b2745af9d9d	@comtaar2245	2022-01-13T09:46:43Z	7	en	5
I would LOVE to know if they use western musical notation in their sheet music, or a totally different system! A comment here is a long shot, but if anyone knows, please chime in! Get a load of those cello-like instruments too!	I would LOVE to know if they use western musical notation in their sheet music, or a totally different system! A comment here is a long shot, but if anyone knows, please chime in! Get a load of those cello-like instruments too!	227	38	Lykgg5phVJE	Blossoms on a Moonlit River in Spring | 春江花月夜	914d52f5bb8e81d5e2214276aace72fe	@brothergoodfoot	2021-12-01T02:59:25Z	5	en	1
Very nice! can you please add some basic information to the video description above: the city/country where this performance took place, and the date of this performance?	Very nice! can you please add some basic information to the video description above: the city/country where this performance took place, and the date of this performance?	170	28	Lykgg5phVJE	Blossoms on a Moonlit River in Spring | 春江花月夜	50582460be3bdae2de06b6994067792d	@dbadagna	2021-11-27T19:53:04Z	3	en	1
Are the musicians still alive up to this present day? If not, I hope they can perform again with the same quality as this.	Are the musicians still alive up to this present day? If not, I hope they can perform again with the same quality as this.	122	23	Lykgg5phVJE	Blossoms on a Moonlit River in Spring | 春江花月夜	75cb2c04036e90c93e7c7cae08f86403	@rencechannel2240	2021-11-08T04:32:18Z	0	en	4
Amazing synchronization. Soothing music.	Amazing synchronization. Soothing music.	40	4	Lykgg5phVJE	Blossoms on a Moonlit River in Spring | 春江花月夜	ed2055165a84136563bd80fd045925fd	@druva2012	2021-10-24T17:31:08Z	1	en	11
Today we celebrate the Mid Autumn Festival. This music piece touches my soul	Today we celebrate the Mid Autumn Festival. This music piece touches my soul	76	13	Lykgg5phVJE	Blossoms on a Moonlit River in Spring | 春江花月夜	adce5c2f8464310768bcf7b925795899	@steventan385	2021-09-21T08:49:51Z	1	en	20
Their spectacular and inspirational performance is a lullaby of my soul, and a cradle of unfathomable emotionFromTokyo of the Land of the Rising Sun	Their spectacular and inspirational performance is a lullaby of my soul, and a cradle of unfathomable emotionFromTokyo of the Land of the Rising Sun 🇯🇵	148	22	Lykgg5phVJE	Blossoms on a Moonlit River in Spring | 春江花月夜	4fb2e9eee16754fa80b631a6cc371435	@shin-i-chikozima	2021-09-16T15:03:25Z	0	en	9
Very good. 9/2021	Very good. 9/2021	17	3	Lykgg5phVJE	Blossoms on a Moonlit River in Spring | 春江花月夜	829c5b168091523f8eb66d7837d2d6dd	@singy1980	2021-09-05T23:35:27Z	0	en	2
What is that sound?	3:43 What is that sound?	19	4	Lykgg5phVJE	Blossoms on a Moonlit River in Spring | 春江花月夜	fb6e3b1f08498a6290f69bb9eebf1873	@areslee1102	2021-08-10T21:35:03Z	5	en	3
Traditional Chinese orchestra is really beautiful, I commend Chinese women. God will bless you.	Traditional Chinese orchestra is really beautiful, I commend Chinese women. God will bless you.	95	13	Lykgg5phVJE	Blossoms on a Moonlit River in Spring | 春江花月夜	58320fdd53dbe81ae9fd0591b42e30c6	@lengly9464	2021-07-03T20:21:58Z	0	en	7
more from the flute player: 曾格格	more from the flute player: https://www.youtube.com/results?search_query=曾格格	31	8	Lykgg5phVJE	Blossoms on a Moonlit River in Spring | 春江花月夜	0421719b62ea336bc48fb6a2e743c171	@minxu8632	2021-06-26T23:01:20Z	0	en	3
Beautiful Classical Guangtung Cantonese music... So proud of my Chinese roots	Beautiful Classical Guangtung Cantonese music... So proud of my Chinese roots	77	11	Lykgg5phVJE	Blossoms on a Moonlit River in Spring | 春江花月夜	0647aafd9c26277ad8f68aa8b8ba2b6f	@meilingwang8636	2021-06-26T19:30:16Z	1	en	7
Look I'm not from the culture of these people but this is amazing this is just simply amazing oh man that girl that flute my goodness the orchestra was just amazing	Look I'm not from the culture of these people but this is amazing this is just simply amazing oh man that girl that flute my goodness the orchestra was just amazing	164	30	Lykgg5phVJE	Blossoms on a Moonlit River in Spring | 春江花月夜	26bc3d8384df0b19817fc29de263deee	@GardenTime55	2021-06-22T01:05:27Z	0	en	12
Can anybody tell me what kind of flute that is Oh boy I want one so bad	Can anybody tell me what kind of flute that is Oh boy I want one so bad	71	16	Lykgg5phVJE	Blossoms on a Moonlit River in Spring | 春江花月夜	ad9884b94770bbf3efa16e9f4dfb37e3	@GardenTime55	2021-06-20T18:52:26Z	3	en	3
Traditional Chinese musical instruments have a very unique yet pleasant sound !!! Is it only females who play them ???	Traditional Chinese musical instruments have a very unique yet pleasant sound !!! Is it only females who play them ??? 💕💕💕💕	118	17	Lykgg5phVJE	Blossoms on a Moonlit River in Spring | 春江花月夜	81f6380ad53482996f5487d4efb4d2f4	@dadjoy2609	2021-05-18T12:58:36Z	5	en	9
am i the only indian here.	am i the only indian here.	26	5	Lykgg5phVJE	Blossoms on a Moonlit River in Spring | 春江花月夜	3387fcbca27a061e439dc2fb4e0abd37	@lemonlemon7272	2021-04-15T06:08:14Z	2	en	6
1998,2001,2011,2021	1998,2001,2011,2021	19	4	Lykgg5phVJE	Blossoms on a Moonlit River in Spring | 春江花月夜	5a54e20647ff0365868cc130dfbabba8	@allensss777	2021-04-05T10:15:25Z	0	en	2
In form and structure this is almost identical to the “ Fisherman’s Song “ which is so beautiful, this is still good to listen to, but the “ Fisherman’s Song” it isn’t.	In form and structure this is almost identical to the “ Fisherman’s Song “ which is so beautiful, this is still good to listen to, but the “ Fisherman’s Song” it isn’t.	168	29	Lykgg5phVJE	Blossoms on a Moonlit River in Spring | 春江花月夜	461b9fc01bb7d8be7a0b4bbab1e3c361	@elena16350	2021-03-31T00:13:34Z	1	en	0
Hey stranger. We don't know each other, but I want to wish you happiness every day and find a happy and beautiful life.	Hey stranger. We don't know each other, but I want to wish you happiness every day and find a happy and beautiful life.	119	21	Lykgg5phVJE	Blossoms on a Moonlit River in Spring | 春江花月夜	346b400186d7e87663f16cc61d9ad98e	@ChineseClassicalMusic01	2021-03-29T03:21:55Z	0	en	8
does anyone know the venue of this performance?	does anyone know the venue of this performance?	47	8	Lykgg5phVJE	Blossoms on a Moonlit River in Spring | 春江花月夜	e882c68867158f175adfdb07ce7745bc	@john-ss8hk	2021-03-07T01:54:25Z	1	en	3
Divine Spring Scenery And Evening Scene.	Divine Spring Scenery And Evening Scene.	40	6	Lykgg5phVJE	Blossoms on a Moonlit River in Spring | 春江花月夜	da596afaf9a97501ec3d7dbed10d48de	@stevenkok1926	2021-02-25T11:44:12Z	0	en	3
Just beautiful Chinese music and just look at those instruments just amazing the culture that these people have for hundreds and hundreds of years no one else has this type of music and sound only from China	Just beautiful Chinese music and just look at those instruments just amazing the culture that these people have for hundreds and hundreds of years no one else has this type of music and sound only from China	207	37	Lykgg5phVJE	Blossoms on a Moonlit River in Spring | 春江花月夜	1723e29f6465a90c92f9337c8f435c6f	@risteardwest3384	2021-02-21T07:24:07Z	1	en	17
After all these years, this is still the best 春江花月夜 I have ever heard, nice performance, nice arrangements, nice performers, better than any other versions.	After all these years, this is still the best 春江花月夜 I have ever heard, nice performance, nice arrangements, nice performers, better than any other versions.	156	28	Lykgg5phVJE	Blossoms on a Moonlit River in Spring | 春江花月夜	61dfb750cd8548de2f920b4a501cc315	@ac888	2021-02-19T17:09:32Z	0	en	17
One of the best traditional Chinese folk pieces, depicting the scene and the sound one is seeing and hearing when riding in a boat on a moonlit river in spring. Just imagine the boat is running slowly on the peaceful water, and the breeze slightly caresses your face. The moon light dances on the ribbles, and you see the mountains and trees along the banks. You can still see the profile of a templ…	One of the best traditional Chinese folk pieces, depicting the scene and the sound one is seeing and hearing when riding in a boat on a moonlit river in spring. Just imagine the boat is running slowly on the peaceful water, and the breeze slightly caresses your face. The moon light dances on the ribbles, and you see the mountains and trees along the banks. You can still see the profile of a templ…	670	119	Lykgg5phVJE	Blossoms on a Moonlit River in Spring | 春江花月夜	01648a6d9051e9c5eca11f51c2225186	@williamli5122	2021-02-02T04:32:20Z	0	en	5
ad running in while halfway listening, just sad	ad running in while halfway listening, just sad	47	8	Lykgg5phVJE	Blossoms on a Moonlit River in Spring | 春江花月夜	6c724b5598a690f5f1d1858b667bb5d3	@mjymjym6113	2021-01-29T06:36:41Z	0	en	1
Listening in Iowa.	Listening in Iowa.	18	3	Lykgg5phVJE	Blossoms on a Moonlit River in Spring | 春江花月夜	2ba39cde8e7e8e29253aa712464c5524	@dennismcqueen9973	2021-01-28T01:52:10Z	0	en	3
one word AMAZING.My feeling is when you listened this kind of music you can died in peace.	one word AMAZING.My feeling is when you listened this kind of music you can died in peace.	90	18	Lykgg5phVJE	Blossoms on a Moonlit River in Spring | 春江花月夜	45f6bcfb1b9b9e2b42abb9c819c5faa6	@norddist	2021-01-27T23:59:23Z	0	en	5
Love to hear again and again because I Love Chinese folks song and music actually i don't understand the words but i am sure should be so meaningful Thank you	Love to hear again and again because I Love Chinese folks song and music actually i don't understand the words but i am sure should be so meaningful Thank you	158	27	Lykgg5phVJE	Blossoms on a Moonlit River in Spring | 春江花月夜	493b59a71288221c833b241a0a7bdbf6	@dhanbahadur5861	2021-01-27T17:13:52Z	3	en	3
First time I've heard this music.Its intoxicating, why are Asian women so beautiful?	First time I've heard this music.Its intoxicating, why are Asian women so beautiful?	84	14	Lykgg5phVJE	Blossoms on a Moonlit River in Spring | 春江花月夜	2f5044d338014e69e9f53e80ddc8903f	@Jim.Thunda	2021-01-25T09:53:25Z	2	en	5
nice and soothing music	nice and soothing music	23	4	Lykgg5phVJE	Blossoms on a Moonlit River in Spring | 春江花月夜	3549109719683fada3d2cc61f8dcbe15	@123Deaver	2021-01-23T12:11:36Z	0	en	2
This is really the Asian soul's sound .I only am intoxicated with their unsurpassed and wonderful performance while moving . From chaotic Tokyo of the Land of the Rising Sun	This is really the Asian soul's sound .I only am intoxicated with their unsurpassed and wonderful performance while moving . From chaotic Tokyo of the Land of the Rising Sun ♨️	173	28	Lykgg5phVJE	Blossoms on a Moonlit River in Spring | 春江花月夜	2d42ca31afbfff6a5494dad180cf52ed	@shin-i-chikozima	2021-01-18T04:24:36Z	2	en	9
Could anybody share with me the history behind this piece of music please?	Could anybody share with me the history behind this piece of music please?	74	13	Lykgg5phVJE	Blossoms on a Moonlit River in Spring | 春江花月夜	d94f57ad5cf5ce29f62fb606e0899203	@anaisrojas973	2021-01-09T03:33:39Z	3	en	1
Oh ! to be LAO TSU again.......	Oh ! to be LAO TSU again.......	31	6	Lykgg5phVJE	Blossoms on a Moonlit River in Spring | 春江花月夜	5675f8efbe9d52b3af58eec92e573d2b	@reginaltedbrown	2021-01-01T17:12:30Z	0	en	1
Totally beautiful. Superb performance	Totally beautiful. Superb performance	37	4	Lykgg5phVJE	Blossoms on a Moonlit River in Spring | 春江花月夜	46b3f88e76282f50549c440f0cb0b603	@tongsifu1128	2020-12-23T10:04:26Z	0	en	2
The best performance so far	The best performance so far	27	5	Lykgg5phVJE	Blossoms on a Moonlit River in Spring | 春江花月夜	f14da2b21fa81f383cc709d2113b39d9	@hk854foody7	2020-12-17T22:12:36Z	0	en	3
Serenity tuneful theme peace sett : hearts gladiolus.	Serenity tuneful theme peace sett : hearts gladiolus.	53	7	Lykgg5phVJE	Blossoms on a Moonlit River in Spring | 春江花月夜	5dab51e989dbabe6b9de75fff15677e9	@avievejomiuhsiawei-sylvan4805	2020-12-16T13:58:03Z	0	en	1
Beautiful, relaxing music.	Beautiful, relaxing music.	26	3	Lykgg5phVJE	Blossoms on a Moonlit River in Spring | 春江花月夜	e22e8794a4d5d35bbf87d14789eac460	@bntyhntr42	2020-12-07T02:01:44Z	0	en	3
Great performance, thank you for uploading.	Great performance, thank you for uploading.	43	6	Lykgg5phVJE	Blossoms on a Moonlit River in Spring | 春江花月夜	505271596fc548de5d567b2cf48d070e	@xyzxyz1908	2020-12-06T09:40:33Z	0	en	3
This is one of my favorites!!!	This is one of my favorites!!!	30	6	Lykgg5phVJE	Blossoms on a Moonlit River in Spring | 春江花月夜	63a16680aa680d94dfd92e86cf736af1	@st1010	2020-11-22T18:28:34Z	0	en	8
Very nice music ...... greetings from Holland	Very nice music ...... greetings from Holland	45	6	Lykgg5phVJE	Blossoms on a Moonlit River in Spring | 春江花月夜	ba4b1dc1986b692770cb54577dfe28d7	@Teddyjaja100	2020-11-17T18:35:39Z	0	en	5
Watching again and again ! Greetings from USA	Watching again and again ! Greetings from USA🙂🙂🙂	45	7	Lykgg5phVJE	Blossoms on a Moonlit River in Spring | 春江花月夜	9cad3054b2a0e36cd41d6ef0bcd0484a	@healthy1686	2020-11-16T01:27:43Z	0	en	9
This is the best orchestra playing this piece ever.	This is the best orchestra playing this piece ever.	51	9	Lykgg5phVJE	Blossoms on a Moonlit River in Spring | 春江花月夜	3f01ddbf1f85e6095bda1e8ddb8022a6	@Loke-h3w	2020-11-07T15:51:34Z	1	en	15
ASSISTINDO AQUI DO BRASIL EM 2020	ASSISTINDO AQUI DO BRASIL EM 2020	33	6	Lykgg5phVJE	Blossoms on a Moonlit River in Spring | 春江花月夜	c38f33f7cb4dd9f73e2824fdfe846b2a	@antoniojoseflorenciodesouz2884	2020-10-12T01:14:31Z	0	en	0
Watching from Utah. Beautiful music, gorgeous costumes. Terrific performance! Most enjoyable. Thank you for posting.	Watching from Utah. Beautiful music, gorgeous costumes. Terrific performance! Most enjoyable. Thank you for posting. 🥰💞👏🙏🏵	116	15	Lykgg5phVJE	Blossoms on a Moonlit River in Spring | 春江花月夜	4a0aa77c7f4f9259da0b79581f57988a	@decmagnet2072	2020-10-11T16:52:15Z	0	en	7
i love this so much	i love this so much	19	4	Lykgg5phVJE	Blossoms on a Moonlit River in Spring | 春江花月夜	714fa4bbb73b07a3c5275c2c62b0c161	@shiqingxuan6124	2020-09-22T14:17:07Z	0	en	5
In fact, it's a classical Cantonese music!	In fact, it's a classical Cantonese music!	42	6	Lykgg5phVJE	Blossoms on a Moonlit River in Spring | 春江花月夜	1039d275bcc9953247a3e4abb0fe051c	@limching52	2020-09-19T13:13:01Z	4	en	4
The uniqueness of this piece of fine music and poem is that it extends the understanding audience's thought from its descriptive and contemplating sound and phases to broader context in philosophy and politics. It could bring up diverse conversations. A kind of general humanity in a poetic Chinese form.	The uniqueness of this piece of fine music and poem is that it extends the understanding audience's thought from its descriptive and contemplating sound and phases to broader context in philosophy and politics. It could bring up diverse conversations. A kind of general humanity in a poetic Chinese form.	304	47	Lykgg5phVJE	Blossoms on a Moonlit River in Spring | 春江花月夜	714716b1e1ec6f62d18c8565f1da312b	@toicoi6758	2020-09-11T04:00:09Z	0	en	7
Very good, thank you very much	Very good, thank you very much	30	6	Lykgg5phVJE	Blossoms on a Moonlit River in Spring | 春江花月夜	113ca70ab04cef063f0cb59abd6c28d1	@rogerliu1182	2020-09-10T02:38:06Z	0	en	3
I first heard this played in Hong Kong Central in 1972 with my , then, Chinese girlfriend, now my wife of 47 years.	I first heard this played in Hong Kong Central in 1972 with my , then, Chinese girlfriend, now my wife of 47 years.	115	21	Lykgg5phVJE	Blossoms on a Moonlit River in Spring | 春江花月夜	416de87d668b93d2f8b0c84c064228b6	@pongysocks	2020-09-09T21:45:57Z	1	en	41
lyrics: 200 BCmusic 1700sParaphrase:I stand and look into the dusk, beyond the spring river, beyond the horizon where the border merges. The moon shines high, the tide flows calm. the moon illuminates the river, illuminates the floral land, where mist and luminescence mix. the moon shines year after years and forever, humans change generation after generation, passion stays, love stays ..	lyrics: 200 BCmusic 1700sParaphrase:I stand and look into the dusk, beyond the spring river, beyond the horizon where the border merges. The moon shines high, the tide flows calm. the moon illuminates the river, illuminates the floral land, where mist and luminescence mix. the moon shines year after years and forever, humans change generation after generation, passion stays, love stays ..	391	61	Lykgg5phVJE	Blossoms on a Moonlit River in Spring | 春江花月夜	b5d039cf3f15c3fe94b64ad605fb4e42	@toicoi6758	2020-09-05T07:16:45Z	0	en	7
Oh my goodness...beautiful music, artistic in every way	Oh my goodness...beautiful music, artistic in every way💙	55	9	Lykgg5phVJE	Blossoms on a Moonlit River in Spring | 春江花月夜	aa12cd006948db14065991a20acd6b5b	@corinthia5843	2020-09-05T02:23:15Z	0	en	6
Lovely and tranquilizing. A short trip back to the Golden Age of Tang . How proud the parents of these musicians must be....at the respect shown by them for a great heritage.	Lovely and tranquilizing. A short trip back to the Golden Age of Tang . How proud the parents of these musicians must be....at the respect shown by them for a great heritage.	174	30	Lykgg5phVJE	Blossoms on a Moonlit River in Spring | 春江花月夜	f43ed9b074130cb936229e99b62c0e4c	@lawrence4318	2020-08-02T01:59:22Z	0	en	11
Yall will be remembered forever for this great show and music	Yall will be remembered forever for this great show and music	61	11	Lykgg5phVJE	Blossoms on a Moonlit River in Spring | 春江花月夜	03848bad55ea4d487caba61678ec1c78	@tralalatrililitrululu1501	2020-07-25T04:31:37Z	0	en	1
EXTREMELY PEACE AND HARMONY MUSIC. PEACE AND BUDDHISM NAMASTE. NO WAR, NO HATE, NO RACISM, NO SEPARATISM, HUMANITY NEED MEDITATION. BUDDHA IS LOVE	EXTREMELY PEACE AND HARMONY MUSIC. PEACE AND BUDDHISM NAMASTE. NO WAR, NO HATE, NO RACISM, NO SEPARATISM, HUMANITY NEED MEDITATION. BUDDHA IS LOVE	146	23	Lykgg5phVJE	Blossoms on a Moonlit River in Spring | 春江花月夜	d7c3bdf840cfcf117b28e6716dc6d597	@alexandrefueta5300	2020-07-20T01:47:53Z	0	en	4
The pipa player is fantastic!	The pipa player is fantastic!	29	5	Lykgg5phVJE	Blossoms on a Moonlit River in Spring | 春江花月夜	b9dcad24143c10ababecb25abba493db	@tonytay7128	2020-07-17T17:05:27Z	0	en	4
Eric Clapton Who?	Eric Clapton Who?	17	3	Lykgg5phVJE	Blossoms on a Moonlit River in Spring | 春江花月夜	141cb93c941c2fe270d19779023ce1d6	@thewonderer8774	2020-07-17T01:44:15Z	1	en	0
Very good artistic music... Great!	Very good artistic music... Great!	34	5	Lykgg5phVJE	Blossoms on a Moonlit River in Spring | 春江花月夜	9070b17858c8752dafaf6c4535520d66	@tinwhistle4367	2020-07-13T19:46:19Z	0	en	2
Ioooooophywwryukoqqwwe to vcdyzxgu	Ioooooophywwryukoqqwwe to vcdyzxgu	34	3	Lykgg5phVJE	Blossoms on a Moonlit River in Spring | 春江花月夜	73559003e4948242b498ffd926ee5c7e	@marwoodautomata7125	2020-07-03T01:52:40Z	0	en	1
This is the best version -- except for the fact that the video is low resolution. Otherwise, the music is great, and the "period correct" dress that they wore looked great!	This is the best version -- except for the fact that the video is low resolution. Otherwise, the music is great, and the "period correct" dress that they wore looked great!	172	30	Lykgg5phVJE	Blossoms on a Moonlit River in Spring | 春江花月夜	2f1e2cc9becae4c8d7374dc97df5d614	@captainjayc9217	2020-06-26T19:58:41Z	0	en	7
These musicians are very talented.	These musicians are very talented.	34	5	Lykgg5phVJE	Blossoms on a Moonlit River in Spring | 春江花月夜	884073587dc3e5c8b1ab08337c9da86b	@aaliaali1386	2020-06-21T04:35:03Z	0	en	6
This music is amazing!	This music is amazing!	22	4	Lykgg5phVJE	Blossoms on a Moonlit River in Spring | 春江花月夜	beee2b9fa980a8f7b56969002fccb6a5	@wendycason1	2020-06-07T17:14:20Z	0	en	4
it is great to see all Chinese team	it is great to see all Chinese team	35	8	Lykgg5phVJE	Blossoms on a Moonlit River in Spring | 春江花月夜	848b4584b3c0b2976dda477dbd9ae82e	@CharlesLam-t9o	2020-06-05T18:09:26Z	0	en	2
My sister loves this music.	My sister loves this music.	27	5	Lykgg5phVJE	Blossoms on a Moonlit River in Spring | 春江花月夜	bc79e5c2f22f4319ceea52ce82a5c3a0	@ninaluong1999	2020-06-03T00:56:56Z	0	en	5
Lovely.. Peaceful music	Lovely.. Peaceful music	23	3	Lykgg5phVJE	Blossoms on a Moonlit River in Spring | 春江花月夜	e7f2120447489f2e34799bbad12bbebe	@Iz_xfattax	2020-04-22T02:03:12Z	0	en	5
This I will come back and listen to again to fully appreciate. Very beautiful ~ thank you	This I will come back and listen to again to fully appreciate. Very beautiful ~ thank you	89	15	Lykgg5phVJE	Blossoms on a Moonlit River in Spring | 春江花月夜	aa84e3e564278f432f4b733562585835	@zeph6439	2020-03-26T14:51:53Z	0	en	8
I have been studying music and history. Alot of instruments are made during stress. This one instrument is not healthy for heart/arm hand finger nerves. Too much work that resembles a spasms.	I have been studying music and history. Alot of instruments are made during stress. This one instrument is not healthy for heart/arm hand finger nerves. Too much work that resembles a spasms.	191	31	Lykgg5phVJE	Blossoms on a Moonlit River in Spring | 春江花月夜	74f614bf52f7767eee9b8f61fa955f10	@theresawalker4219	2020-03-17T19:49:55Z	2	en	0
Beautiful concert.God Bless the Artists.Thanks，come from China	Beautiful concert.God Bless the Artists.Thanks，come from China	62	11	Lykgg5phVJE	Blossoms on a Moonlit River in Spring | 春江花月夜	214eff7e386c0df4e0e2e5a12f4fc99e	@look007456	2020-03-11T04:48:18Z	0	en	1
Thank you for this wonderful music，come from China	Thank you for this wonderful music，come from China	50	10	Lykgg5phVJE	Blossoms on a Moonlit River in Spring | 春江花月夜	59703f474703021454f2743d9fb1236f	@look007456	2020-03-11T04:47:47Z	0	en	1
Thank you for this wonderful music. Good health to you from America.	Thank you for this wonderful music. Good health to you from America.	68	12	Lykgg5phVJE	Blossoms on a Moonlit River in Spring | 春江花月夜	ac291720b5c1365f92124af89415926b	@randyrick8019	2020-03-04T22:09:25Z	0	en	1
I really enjoy. Maybe last life, I was Chinese.	I really enjoy. Maybe last life, I was Chinese.	47	7	Lykgg5phVJE	Blossoms on a Moonlit River in Spring | 春江花月夜	b81b3645f750dc1dd3884775c5b40f52	@caosongl	2020-02-21T14:00:34Z	1	en	12
Beautiful concert.God Bless the Artists.Thanks	Beautiful concert.God Bless the Artists.Thanks	46	7	Lykgg5phVJE	Blossoms on a Moonlit River in Spring | 春江花月夜	38aa0130558b040cbdadf4fccd81253f	@govindarajulu-kasturi9614	2020-02-19T15:07:52Z	0	en	5
I am always puzzled by the unlikes on every upload. Are these the people who think they can do better or are they just sour grapes?	I am always puzzled by the unlikes on every upload. Are these the people who think they can do better or are they just sour grapes?	131	25	Lykgg5phVJE	Blossoms on a Moonlit River in Spring | 春江花月夜	b957dc8462edb271e43f6a45032cabca	@fayboss88	2020-02-10T22:10:47Z	3	en	6
Yang Jing (pipa) and Ca Gege (flute) are consummate Chinese musicians and this performance nearly 20 yrs ago are classic!	Yang Jing (pipa) and Ca Gege (flute) are consummate Chinese musicians and this performance nearly 20 yrs ago are classic!	121	20	Lykgg5phVJE	Blossoms on a Moonlit River in Spring | 春江花月夜	7836073241d85813609d003b9d909599	@tohngyahn	2020-01-22T18:29:17Z	0	en	4
What are these traditional instruments called please?	What are these traditional instruments called please?	53	7	Lykgg5phVJE	Blossoms on a Moonlit River in Spring | 春江花月夜	4063d02df19d6b46b2ae8febf3f88ac8	@aubynfresh9434	2020-01-20T02:51:14Z	2	en	1
Superb, great music and incredible arts.	Superb, great music and incredible arts.	40	6	Lykgg5phVJE	Blossoms on a Moonlit River in Spring | 春江花月夜	412d14a09c1e0229fe79c377d7206018	@tylerwaxman7512	2020-01-10T01:10:24Z	0	en	4
This is so relaxing	This is so relaxing	19	4	Lykgg5phVJE	Blossoms on a Moonlit River in Spring | 春江花月夜	6b830871b709bc3ca5322b3598b51b51	@carolzinhaagringa897	2020-01-07T15:19:29Z	0	en	0
Excellent video illustrating many classical Chinese instruments.	Excellent video illustrating many classical Chinese instruments.	64	7	Lykgg5phVJE	Blossoms on a Moonlit River in Spring | 春江花月夜	bf8b54e81e31747e347220270a7af360	@robertschlesinger1342	2019-12-29T23:53:34Z	0	en	6
This was my father’s favorite. Still remember it well after 60 years.	This was my father’s favorite. Still remember it well after 60 years.	69	12	Lykgg5phVJE	Blossoms on a Moonlit River in Spring | 春江花月夜	708f98f0ec7d97003426c0d8d994c7ac	@leejenwei5786	2019-12-24T02:00:52Z	1	en	9
That is fabulously refreshing thanks , everyone beautiful video ,awesomely preformed Merry Christmas everyone. Luv it	That is fabulously refreshing thanks , everyone beautiful video ,awesomely preformed Merry Christmas everyone. Luv it	117	15	Lykgg5phVJE	Blossoms on a Moonlit River in Spring | 春江花月夜	12e6aa1f992cd0c5919c22c47d9d9d57	@lilman1796	2019-12-21T19:12:47Z	0	en	2
Can you upload more but free download?	Can you upload more but free download?	38	7	Lykgg5phVJE	Blossoms on a Moonlit River in Spring | 春江花月夜	d4d74c576796b0d8f9a833acc041a094	@poantjioe2573	2019-12-21T01:55:42Z	0	en	1
this art event adds believable Proof to our Positive Human Side. Thankyou..	this art event adds believable Proof to our Positive Human Side. Thankyou..	75	12	Lykgg5phVJE	Blossoms on a Moonlit River in Spring | 春江花月夜	d94d25a204efcf4d117c927ed644e52d	@danroley7850	2019-11-27T15:06:37Z	0	en	5
Beautiful and relaxing...so many feels #inlovewithChinesemusic	Beautiful and relaxing...so many feels ❤❤❤👏👏👏 #inlovewithChinesemusic	62	7	Lykgg5phVJE	Blossoms on a Moonlit River in Spring | 春江花月夜	f9316631d22053dd2bf17f0e255a6d70	@blueoceangurl28	2019-11-10T19:20:09Z	0	en	4
春江潮水连海平， 海上明月共潮生。The place Zhang Ruoxu lived is Yangzhou. You might wonder where is Yangzhou and how it looks like. Yangzhou is located in south of Jiangsu Province, near the confluences of the Yangtze River and the Grand Canal, and at the north bank of lower reaches of the Yangtze River. Yangzhou city has been a fascinating natural beauty in China since ancient times. It got blessed with endless…	春江潮水连海平， 海上明月共潮生。The place Zhang Ruoxu lived is Yangzhou. You might wonder where is Yangzhou and how it looks like. Yangzhou is located in south of Jiangsu Province, near the confluences of the Yangtze River and the Grand Canal, and at the north bank of lower reaches of the Yangtze River. Yangzhou city has been a fascinating natural beauty in China since ancient times. It got blessed with endless…	8464	1759	Lykgg5phVJE	Blossoms on a Moonlit River in Spring | 春江花月夜	45e9d9791e63e9eed12c854c3e9e5cde	@quangtran8715	2019-11-03T11:05:18Z	1	en	12
no one can defeat such great culture	no one can defeat such great culture	36	7	Lykgg5phVJE	Blossoms on a Moonlit River in Spring | 春江花月夜	60f97a1ec339b11546548dbdf852ffe3	@adamsaoud7191	2019-10-22T21:57:17Z	0	en	16
when she is playing i feel like she is playing on my heart s strings	when she is playing i feel like she is playing on my heart s strings	68	13	Lykgg5phVJE	Blossoms on a Moonlit River in Spring | 春江花月夜	826bd6df965ed2c25269d2ee9c1a2c1e	@adamsaoud7191	2019-10-22T21:53:41Z	0	en	7
no one can say our culture is the best every culture has its taste so great nations must have great things great arts great music finely great culture for sure	no one can say our culture is the best every culture has its taste so great nations must have great things great arts great music finely great culture for sure	159	30	Lykgg5phVJE	Blossoms on a Moonlit River in Spring | 春江花月夜	664e8f3fb1b3190135f60004e0bc7da0	@adamsaoud7191	2019-10-22T21:52:02Z	0	en	5
Fantastic. Heavenly music.	Fantastic. Heavenly music.	26	3	Lykgg5phVJE	Blossoms on a Moonlit River in Spring | 春江花月夜	9f348a03aa073ce67696ad63e298a58f	@markonefly	2019-10-20T09:46:40Z	0	en	2
This is the BEST ChunjiangHuayueye!	This is the BEST ChunjiangHuayueye!	35	5	Lykgg5phVJE	Blossoms on a Moonlit River in Spring | 春江花月夜	3ca87f73eb4d86b3eac5a310fc78ee06	@flowerparfum	2019-10-13T14:45:18Z	0	en	2
I am from India. I respect and love the great Chinese civilisation..!!	I am from India. I respect and love the great Chinese civilisation..!!🙏🙏	70	10	Lykgg5phVJE	Blossoms on a Moonlit River in Spring | 春江花月夜	a761a791f2c688bd9fa043571e29d29f	@vivekpilot	2019-09-30T13:53:14Z	4	en	24
Superb, masterpiece... One of the most beautiful musics int the whole world ever, no doubt	Superb, masterpiece... One of the most beautiful musics int the whole world ever, no doubt	90	15	Lykgg5phVJE	Blossoms on a Moonlit River in Spring | 春江花月夜	7ae1e5649ea405f90ce09fd6220bf485	@rafaeld.2554	2019-09-13T14:09:19Z	0	en	5
Is the orchestra all women?	Is the orchestra all women?	27	5	Lykgg5phVJE	Blossoms on a Moonlit River in Spring | 春江花月夜	0c1122f4732a61079b7db11ed9bcb11e	@petjobedet4650	2019-09-11T10:26:24Z	1	en	4
What the frig	What the frig	13	3	Lykgg5phVJE	Blossoms on a Moonlit River in Spring | 春江花月夜	290ad58f7c38470d37cb4af404a118d5	@lanmi2926	2019-09-10T17:55:02Z	1	en	1
No word can describe how beautiful this is.	No word can describe how beautiful this is.	43	8	Lykgg5phVJE	Blossoms on a Moonlit River in Spring | 春江花月夜	0ec8b97d162923ea02aad1ca400c14e8	@rafaeld.2554	2019-09-03T17:17:07Z	0	en	11
Beautiful music! Thank you from my !	Beautiful music! Thank you from my ❤!	36	6	Lykgg5phVJE	Blossoms on a Moonlit River in Spring | 春江花月夜	7f8b9e8c838b07f62c903a0a557a83d3	@monicabermea7652	2019-08-25T18:02:17Z	0	en	10
IM.FAISAL.TH.NISE.VOSE.OLD.THOUSEND.YRES.OLD.W.O.MAND.TACH.TH.VOSE.HY.200019..	IM.FAISAL.TH.NISE.VOSE.OLD.THOUSEND.YRES.OLD.W.O.MAND.TACH.TH.VOSE.HY.200019..	78	15	Lykgg5phVJE	Blossoms on a Moonlit River in Spring | 春江花月夜	ce4a56dbd4d6092f55f59bafdad91ae1	@faisalfz5826	2019-08-16T07:35:30Z	0	en	0
Incredibly beautiful! Thank you!	Incredibly beautiful! Thank you!	32	4	Lykgg5phVJE	Blossoms on a Moonlit River in Spring | 春江花月夜	7ed717996ea3b2dd44a1db230afc0ffc	@sharonlong8969	2019-08-15T01:21:47Z	0	en	5
Osm Ladies very good music instruments...	Osm Ladies very good music instruments...	41	6	Lykgg5phVJE	Blossoms on a Moonlit River in Spring | 春江花月夜	e7913debc0f732494a579eff616cd319	@jainegi960	2019-08-14T08:06:00Z	0	en	2
Thank some one who likes my comment.	Thank some one who likes my comment.	36	7	Lykgg5phVJE	Blossoms on a Moonlit River in Spring | 春江花月夜	e4b43341ffebca4d8affc647414c2067	@janethu9169	2019-08-01T22:23:52Z	0	en	0
Did somebody sneeze right near the middle?	Did somebody sneeze right near the middle?	42	7	Lykgg5phVJE	Blossoms on a Moonlit River in Spring | 春江花月夜	98fab5700fd24744b9eb2c4274b27686	@rwheels6471	2019-07-31T20:10:02Z	0	en	3
This is The Authentic Chinese musical instruments. So bloody relaxing.	This is The Authentic Chinese musical instruments. So bloody relaxing.	70	10	Lykgg5phVJE	Blossoms on a Moonlit River in Spring | 春江花月夜	5ed18826ee4a743816ee5fc123f8b1b0	@rickytan3483	2019-07-31T06:56:38Z	0	en	11
maybe the musicians doing a lot of practice.. making the music so nice to hear..	maybe the musicians doing a lot of practice.. making the music so nice to hear..	80	14	Lykgg5phVJE	Blossoms on a Moonlit River in Spring | 春江花月夜	e7e82faf39b56dc88feaf17454393c63	@kamarulzaman6907	2019-07-22T15:09:44Z	1	en	7
Thank some one who likes my comment	Thank some one who likes my comment	35	7	Lykgg5phVJE	Blossoms on a Moonlit River in Spring | 春江花月夜	2aa25428e1d4674145fce0b47d0bd11c	@janethu9169	2019-07-08T13:58:35Z	0	en	0
Chinese music instruments are beautiful	Chinese music instruments are beautiful	39	5	Lykgg5phVJE	Blossoms on a Moonlit River in Spring | 春江花月夜	478603be8ff49299f3d4b7ffd8039245	@janethu9169	2019-07-06T06:11:25Z	0	en	14
The young lady in blue who plays the flute is so beautiful and so talented. I love love love this music!	The young lady in blue who plays the flute is so beautiful and so talented. I love love love this music!	104	20	Lykgg5phVJE	Blossoms on a Moonlit River in Spring | 春江花月夜	5f3767097dc5cfc4b304664e70cd5eb0	@donnakelley1202	2019-06-27T18:18:26Z	1	en	16
in the west we've never seen the blossoms on a moonlit river ... so how can we understand?	in the west we've never seen the blossoms on a moonlit river ... so how can we understand?	90	17	Lykgg5phVJE	Blossoms on a Moonlit River in Spring | 春江花月夜	1a69c5488a4c5f6fbe879a0ce0960b54	@0unhallowed0	2019-06-20T04:09:27Z	8	en	4
Good music to practice kung fu	Good music to practice kung fu	30	6	Lykgg5phVJE	Blossoms on a Moonlit River in Spring | 春江花月夜	7a51b7de8d80940080343f9843702893	@miguelangelsuarez2605	2019-06-07T23:04:19Z	5	en	7
Beautiful attire and even better music!!!!!♡	Beautiful attire and even better music!!!!!♡	44	6	Lykgg5phVJE	Blossoms on a Moonlit River in Spring | 春江花月夜	7ba13d4a553079e40b29b372ffa0c361	@ghiughfcvgugdgg4345	2019-06-07T15:54:01Z	0	en	0
Wow! -and that says something!!!!!	Wow! -and that says something!!!!!	34	5	Lykgg5phVJE	Blossoms on a Moonlit River in Spring | 春江花月夜	04d794f22e162509c5a463f0e2369de2	@ghiughfcvgugdgg4345	2019-06-07T15:52:34Z	0	en	1
You are so talented!!!!!!	You are so talented!!!!!!	25	4	Lykgg5phVJE	Blossoms on a Moonlit River in Spring | 春江花月夜	1d1502784223882772f6fbfa1d8c10b6	@ghiughfcvgugdgg4345	2019-06-07T15:51:07Z	0	en	1
Perfect. Just perfect! Greetings from Greece!	Perfect. Just perfect! Greetings from Greece!	45	6	Lykgg5phVJE	Blossoms on a Moonlit River in Spring | 春江花月夜	4918f4c831df7d1a2c3dfc5317882375	@akisseventynine	2019-06-07T11:31:54Z	0	en	4
Delightful music..Well played by all. Long live with good health and with the needy wealth by the grace of the Almighty of the Universes.Respect females.	Delightful music..Well played by all. Long live with good health and with the needy wealth by the grace of the Almighty of the Universes.Respect females.	153	27	Lykgg5phVJE	Blossoms on a Moonlit River in Spring | 春江花月夜	8df1774f3948d6d2cc55cb827a2dde8a	@ganesankuppusamy8343	2019-05-22T04:58:02Z	0	en	3
The best and old civilization	The best and old civilization 😍	29	5	Lykgg5phVJE	Blossoms on a Moonlit River in Spring | 春江花月夜	488753727fa829cccb2b72bb691ae71d	@zhiir5546	2019-05-18T06:07:07Z	0	en	7
Beautiful fashion and music.	Beautiful fashion and music.	28	4	Lykgg5phVJE	Blossoms on a Moonlit River in Spring | 春江花月夜	63ade33c52d37a51dbfdcdee367df144	@neoniahazelwood9263	2019-05-16T02:37:30Z	0	en	5
Great Music Artists ...More Than Beautiful Music ... Great Performance!	Great Music Artists ...More Than Beautiful Music ... Great Performance!	71	9	Lykgg5phVJE	Blossoms on a Moonlit River in Spring | 春江花月夜	8acc94fbb903e4465d9ac48129aca2bb	@healthy1686	2019-05-13T22:30:30Z	0	en	6
That celestial music is and will be for ever a joy to listen . thanks a lot !	That celestial music is and will be for ever a joy to listen . thanks a lot !	77	14	Lykgg5phVJE	Blossoms on a Moonlit River in Spring | 春江花月夜	c4503634dfbd46959caa700d343b2529	@silentspring685	2019-05-10T18:02:57Z	2	en	3
To those who criticise their attire... I would like to ask you guys, are you listening the music or watching the music? Don't be a foolish person.	To those who criticise their attire... I would like to ask you guys, are you listening the music or watching the music? Don't be a foolish person.	146	25	Lykgg5phVJE	Blossoms on a Moonlit River in Spring | 春江花月夜	75bf20d5f912c5ea3f32decac7677f08	@chineseibanbutnotcommunist5117	2019-05-10T00:52:55Z	0	en	4
She is one of the finest Chinese lute player.	She is one of the finest Chinese lute player.	45	9	Lykgg5phVJE	Blossoms on a Moonlit River in Spring | 春江花月夜	04bf72924853cab528ad882e80e35397	@PacificValley-w4u	2019-05-08T08:15:50Z	0	en	2
what's that type of flute called?	what's that type of flute called?	33	6	Lykgg5phVJE	Blossoms on a Moonlit River in Spring | 春江花月夜	158cb0c946bb06f9f9a4a9872295a05e	@Midgaardsorm	2019-05-01T07:27:52Z	2	en	1
Buddhism, yoga and meditation and hypnosis is polished with the system of idolatry in the thought that as a result of 21 'st Century	Buddhism, yoga and meditation and hypnosis is polished with the system of idolatry in the thought that as a result of 21 'st Century	132	23	Lykgg5phVJE	Blossoms on a Moonlit River in Spring | 春江花月夜	e48c55f2752c95e52b3811b278258371	@osmantekin9041	2019-04-28T11:44:12Z	0	en	0
Beautiful music. Thank you for sharing this video!	Beautiful music. Thank you for sharing this video!	50	8	Lykgg5phVJE	Blossoms on a Moonlit River in Spring | 春江花月夜	376be7c66a54ed14a4430f67eb4212a9	@chineselinguist463	2019-04-28T03:37:10Z	0	en	4
I love the Pipa - the Chinese lute.	I love the Pipa - the Chinese lute.	35	6	Lykgg5phVJE	Blossoms on a Moonlit River in Spring | 春江花月夜	1818d66afe43ad08f5a82862bc693676	@captebbtide	2019-04-25T03:17:30Z	0	en	5
Lovely and relaxing, perfect to listen to on a spring evening. Duo xie.	Lovely and relaxing, perfect to listen to on a spring evening. Duo xie. 💕	71	12	Lykgg5phVJE	Blossoms on a Moonlit River in Spring | 春江花月夜	35587a8386d8320948c771fbd635d374	@simone222	2019-04-18T09:59:25Z	0	en	6
I just absolutely love traditional japanese and chinese music. I wish I could find more.	I just absolutely love traditional japanese and chinese music. I wish I could find more.	88	12	Lykgg5phVJE	Blossoms on a Moonlit River in Spring | 春江花月夜	cff10d10c21b05aeb2226bb5b3b0d31f	@matthewdalessandro5975	2019-04-18T01:11:30Z	1	en	7
It's a music of peace...best music...congratulations to all.	It's a music of peace...best music...congratulations to all.	60	9	Lykgg5phVJE	Blossoms on a Moonlit River in Spring | 春江花月夜	94f222cdd2282dce806953a3065af848	@sultanmahmud6762	2019-04-05T14:28:17Z	2	en	6
Very wonderful piece of music and charming ladies.	Very wonderful piece of music and charming ladies.	50	8	Lykgg5phVJE	Blossoms on a Moonlit River in Spring | 春江花月夜	bfaddbefbc1408e1f461ed1a28581d96	@chauchauchau4337	2019-03-28T02:01:31Z	0	en	5
Very soothing music.	Very soothing music.	20	3	Lykgg5phVJE	Blossoms on a Moonlit River in Spring | 春江花月夜	b47e7966782f90e1618dedd000811605	@QuekMS	2019-03-15T08:42:23Z	0	en	4
very nice i love this	very nice i love this	21	4	Lykgg5phVJE	Blossoms on a Moonlit River in Spring | 春江花月夜	7b30fcb12d6f26762e35fedcc89c138b	@gizmotony1234	2019-03-12T02:37:41Z	0	en	4
1 like = Good music	1 like = Good music	19	3	Lykgg5phVJE	Blossoms on a Moonlit River in Spring | 春江花月夜	b9fca1b4d979255a0c0be473b22e93dd	@中國傳統音樂-v2t	2019-03-12T02:05:43Z	1	en	4
This classic piece is about love, peace, prosperity, harmony, beautifulness of the nature, and the wonder of the universe. the poem with the same name comes first in Tang dynasty, then the painting comes in Song dynasty, then the music was composed in Qing dynasty.	This classic piece is about love, peace, prosperity, harmony, beautifulness of the nature, and the wonder of the universe. the poem with the same name comes first in Tang dynasty, then the painting comes in Song dynasty, then the music was composed in Qing dynasty.	265	45	Lykgg5phVJE	Blossoms on a Moonlit River in Spring | 春江花月夜	e764aa42490fe6bb9e6bf9bee961c226	@KamilaValieva-fan	2019-02-24T01:29:15Z	2	en	12
We need more of this in modern China.	We need more of this in modern China.	37	8	Lykgg5phVJE	Blossoms on a Moonlit River in Spring | 春江花月夜	6977aac97081de2e271a2af17662ffb5	@scottsanett	2019-02-23T13:07:42Z	0	en	13
Traditional Chinese music is an amazing art with a very special place in my heart	Traditional Chinese music is an amazing art with a very special place in my heart	81	14	Lykgg5phVJE	Blossoms on a Moonlit River in Spring | 春江花月夜	7eef62d10b4890890faf11d04890206f	@zachsierra91	2019-02-21T13:35:44Z	0	en	17
Oh my this is so beautiful. Very emotional, yet soothing and relaxing. Such wonderful talent these musicians possess.	Oh my this is so beautiful. Very emotional, yet soothing and relaxing. Such wonderful talent these musicians possess. 💙🕊🌹	117	18	Lykgg5phVJE	Blossoms on a Moonlit River in Spring | 春江花月夜	a3022d2d780ebbfdac49f644c5398dbc	@shayekisitu	2019-02-05T08:35:08Z	0	en	11
Good music to eat my fried rice XD	Good music to eat my fried rice XD	34	8	Lykgg5phVJE	Blossoms on a Moonlit River in Spring | 春江花月夜	905c52ec644d230dfc51af0748e601da	@maxmedia5014	2019-01-27T17:38:45Z	2	en	2
Celetialy Devin and melodious voice that enthusiasm mix ever charming...... Ceiceiro... Gujrat.. Republican state of India	Celetialy Devin and melodious voice that enthusiasm mix ever charming...... Ceiceiro... Gujrat.. Republican state of India	122	16	Lykgg5phVJE	Blossoms on a Moonlit River in Spring | 春江花月夜	fde8e132d06e6f11b1aaeacfae8c4b99	@chetanshukla2534	2019-01-25T16:10:37Z	0	en	3
How serene the tune and very calming.Hope there are lyrics or where the song intended for.	How serene the tune and very calming.Hope there are lyrics or where the song intended for.	90	17	Lykgg5phVJE	Blossoms on a Moonlit River in Spring | 春江花月夜	a085a64473e2c7bde774f59d2b3128a6	@auroratagaan6416	2019-01-22T14:02:48Z	1	en	1
this wonderfull melody is....telling about something. what thing? can be our willing or wishes	this wonderfull melody is....telling about something. what thing? can be our willing or wishes	94	15	Lykgg5phVJE	Blossoms on a Moonlit River in Spring | 春江花月夜	c00782142e7a00e25a12c01f5295a372	@eriklarsson1027	2019-01-17T22:54:29Z	4	en	0
I love music that paints a beautiful picture in my head. It's too bad that only I can see it.	I love music that paints a beautiful picture in my head. It's too bad that only I can see it.	93	17	Lykgg5phVJE	Blossoms on a Moonlit River in Spring | 春江花月夜	748d8bd1f1def349c22251473540b498	@timothylegg	2019-01-17T20:12:42Z	1	en	2
So good to listen to. Chinese culture and music is 5000 years old I hope you all make it last another 5000 years..	So good to listen to. Chinese culture and music is 5000 years old I hope you all make it last another 5000 years..	114	22	Lykgg5phVJE	Blossoms on a Moonlit River in Spring | 春江花月夜	aef9d43299bc460311ce492c4e32fd9f	@HarrySmith-hr2iv	2019-01-14T22:58:01Z	1	en	19
I absolutely love the attire, all in traditional Chinese style. Very appropreciate for the perfermance.	I absolutely love the attire, all in traditional Chinese style. Very appropreciate for the perfermance.	103	14	Lykgg5phVJE	Blossoms on a Moonlit River in Spring | 春江花月夜	e47dd0918d4a1b85e611f7b618e9ac9d	@TheXmeimei	2019-01-13T22:44:51Z	0	en	3
What a beautiful Mellody version music's. The hamony of the great music. It's lovely.....Really .Thanks for haconaAtlanta, Georgia U.S.A	What a beautiful Mellody version music's. The hamony of the great music. It's lovely.....Really .Thanks for haconaAtlanta, Georgia U.S.A	136	18	Lykgg5phVJE	Blossoms on a Moonlit River in Spring | 春江花月夜	d494d11a67a84eb00242264503a6d79a	@kwonlim8524	2018-11-30T09:35:30Z	0	en	3
Beautiful music and video.	Beautiful music and video.	26	4	Lykgg5phVJE	Blossoms on a Moonlit River in Spring | 春江花月夜	abf71bc9acd0da806a75b4e945599e3c	@neoniahazelwood9263	2018-11-29T21:39:22Z	0	en	0
The music is enchanting. The ladies gowns are very beautiful. By the patina on the music instruments, I am interested to know the age of these beautiful sounding instruments, of course, recognizing the brilliant skill with which they are played. This was a joy to listen to, well done all!!	The music is enchanting. The ladies gowns are very beautiful. By the patina on the music instruments, I am interested to know the age of these beautiful sounding instruments, of course, recognizing the brilliant skill with which they are played. This was a joy to listen to, well done all!!	290	48	Lykgg5phVJE	Blossoms on a Moonlit River in Spring | 春江花月夜	de467b42d4e4d54400fdf4ea96a62bb7	@robertrish4292	2018-11-26T01:42:32Z	0	en	5
Great talented performance and tasteLost few days I am watching and listening Chinese music wonderfulChinese have very good music sense	Great talented performance and tasteLost few days I am watching and listening Chinese music wonderfulChinese have very good music sense	135	19	Lykgg5phVJE	Blossoms on a Moonlit River in Spring | 春江花月夜	17d52804c996d37e9a95f776884847de	@tutiorials1274	2018-11-21T11:41:49Z	0	en	1
Beautiful music - amazing orchestra. Out of respect and curiosity, I don’t see a conductor - is that correct may I ask?	Beautiful music - amazing orchestra. Out of respect and curiosity, I don’t see a conductor - is that correct may I ask?	119	17	Lykgg5phVJE	Blossoms on a Moonlit River in Spring | 春江花月夜	8ba281a1de44a0697a2fd89d1eea5bb4	@romkoh	2018-11-16T01:20:59Z	1	en	3
A peaceful wind, a rushing river, a mysterious dusk, ice crystals melting into a hot spring.	A peaceful wind, a rushing river, a mysterious dusk, ice crystals melting into a hot spring.	92	12	Lykgg5phVJE	Blossoms on a Moonlit River in Spring | 春江花月夜	dad91d1725d58e4ff0c65aafa98039c4	@createallow3126	2018-10-26T22:26:18Z	0	en	2
With this piece, one is called to pause and reflect, to bask in the calmness of a wonderful realization. Among all the possible beautiful, nay divine music in the world, this precious beacon came to us gently offering the exquisite discovery that this video is among the first ones ever posted on youtube you guys omigod	With this piece, one is called to pause and reflect, to bask in the calmness of a wonderful realization. Among all the possible beautiful, nay divine music in the world, this precious beacon came to us gently offering the exquisite discovery that this video is among the first ones ever posted on youtube you guys omigod	320	55	Lykgg5phVJE	Blossoms on a Moonlit River in Spring | 春江花月夜	1713ef545ef15b8fa436bbfa1a1449ec	@beatricecoquilleau626	2018-10-19T03:02:35Z	0	en	5
I like Chinese instrumental music.	I like Chinese instrumental music.	34	4	Lykgg5phVJE	Blossoms on a Moonlit River in Spring | 春江花月夜	8412ba7383c1b5558e23793b861504d0	@sayanyo3653	2018-10-05T09:39:57Z	0	en	4
Great / Fantastic Group performance ! We like to hear the music again and again.Thanks.	Great / Fantastic Group performance ! We like to hear the music again and again.Thanks.	87	14	Lykgg5phVJE	Blossoms on a Moonlit River in Spring | 春江花月夜	f054c71b58ddd7f85641ac9a833246bf	@timwong5171	2018-10-02T06:32:45Z	0	en	3
I am big fan like this type music ... When I first listen in Chinese movie comgfu hustle .. Mind blowing. I love it. Now I want learn it where and how I learn it? Suggest me dear friends.	I am big fan like this type music ... When I first listen in Chinese movie comgfu hustle .. Mind blowing. I love it. Now I want learn it where and how I learn it? Suggest me dear friends. 🙏🤗	187	32	Lykgg5phVJE	Blossoms on a Moonlit River in Spring | 春江花月夜	fdae4e2239554db2790e22017d5b6a45	@ramraj_jat	2018-09-26T04:46:44Z	7	en	10
pipa playing is excellent	pipa playing is excellent	25	4	Lykgg5phVJE	Blossoms on a Moonlit River in Spring | 春江花月夜	e332e530dcbefb74b9d8afb9db54b560	@emil55lee	2018-09-21T17:05:17Z	0	en	5
the Glitch in	the Glitch in 6:25	13	3	Lykgg5phVJE	Blossoms on a Moonlit River in Spring | 春江花月夜	cc20d68c2afb2b3abf1f899397dd6dd0	@nguyenbrandy8935	2018-09-10T00:37:57Z	0	en	4
Lock in the beby	Lock in the beby🤔🤔🤔	16	4	Lykgg5phVJE	Blossoms on a Moonlit River in Spring | 春江花月夜	9523b1b0d3e994bb7ee3f82866baaa4a	@akstill8198	2018-08-30T18:52:58Z	0	en	3
Very Good; Very Colorful: who is the Flute Master, the Gong Master at interval 2:00min and interval, also Percussions Master! Bravo!	Very Good; Very Colorful: who is the Flute Master, the Gong Master at interval 2:00min and 5:12 interval, also Percussions Master! Bravo!	132	22	Lykgg5phVJE	Blossoms on a Moonlit River in Spring | 春江花月夜	bc6541f5e55dfc56b1ad602e387e2076	@thompitman	2018-08-29T00:21:35Z	1	en	3
Excellent ! These two singers are the best l have seen so far.	Excellent ! These two singers are the best l have seen so far.	62	11	Lykgg5phVJE	Blossoms on a Moonlit River in Spring | 春江花月夜	d23d5af732e111b200765dfea2f58275	@Luckyman550	2018-08-25T12:46:52Z	1	en	3
I feel like dancing in the clouds!	I feel like dancing in the clouds!	34	6	Lykgg5phVJE	Blossoms on a Moonlit River in Spring | 春江花月夜	33697e284a0eec80d2cbbdf3d6d653c0	@phillipesteele2021	2018-08-24T17:34:19Z	1	en	6
What an amazing graceful angelic music.	What an amazing graceful angelic music.	39	6	Lykgg5phVJE	Blossoms on a Moonlit River in Spring | 春江花月夜	7dd3921670f6627f0b137c6f3eb75069	@ygudina	2018-08-19T07:07:47Z	1	en	11
What a wonderful gifts and talents !!!	What a wonderful gifts and talents !!!	38	5	Lykgg5phVJE	Blossoms on a Moonlit River in Spring | 春江花月夜	e76d1e2fabef11ca3426ba4a91703e31	@101life9	2018-08-07T12:05:37Z	0	en	4
Beautiful dresses and music. Fantastic skills! I want to play like her :)	Beautiful dresses and music. Fantastic skills! I want to play like her :)	73	11	Lykgg5phVJE	Blossoms on a Moonlit River in Spring | 春江花月夜	d50b7210d5986a6818018fb9daee1aa4	@l.g.a.8930	2018-08-06T01:37:52Z	0	en	9
Excellent. Words will fail to express its high standard aesthetic significance.	Excellent. Words will fail to express its high standard aesthetic significance.	79	11	Lykgg5phVJE	Blossoms on a Moonlit River in Spring | 春江花月夜	08ae322f78df7e4930aa59aa4ce59646	@aishwaryaburagohain4211	2018-08-04T06:01:14Z	1	en	7
heavenly - love from goa- india	heavenly - love from goa- india	31	5	Lykgg5phVJE	Blossoms on a Moonlit River in Spring | 春江花月夜	13cf5926568b3557801a89cb113f8214	@macnewman2588	2018-08-03T13:54:56Z	0	en	9
Your an all Lady's Orchestra love the music and your dresses	Your an all Lady's Orchestra love the music and your dresses	60	11	Lykgg5phVJE	Blossoms on a Moonlit River in Spring | 春江花月夜	caf80a2ab51dcc9a39301f03d39507c5	@davidsalisbury6620	2018-07-30T23:34:10Z	0	en	3
I've never heard playing in time this precisely before.	I've never heard playing in time this precisely before.	55	9	Lykgg5phVJE	Blossoms on a Moonlit River in Spring | 春江花月夜	a5ace8fbcad52dd6c2b2dc0ba2f88c9b	@jonahlynx94	2018-07-23T04:21:11Z	0	en	5
Beautifully played music and performance. Thank you. Enjoyed it thoroughly.	Beautifully played music and performance. Thank you. Enjoyed it thoroughly.	75	10	Lykgg5phVJE	Blossoms on a Moonlit River in Spring | 春江花月夜	a00c97ad3ed0dba4d9d493439ff37ab0	@KCECC-ActiveHealthyAgeing	2018-07-20T13:01:22Z	0	en	4
love it, thank you so much for putting it on youtube!	love it, thank you so much for putting it on youtube!	53	11	Lykgg5phVJE	Blossoms on a Moonlit River in Spring | 春江花月夜	f15267758d9a66867cb2c862c891c50b	@aatt3209	2018-07-11T04:15:30Z	0	en	8
Hearing this ethereal bliss i am transported into a tranquil state. Thanks. I love it!	Hearing this ethereal bliss i am transported into a tranquil state. Thanks. I love it!	86	12	Lykgg5phVJE	Blossoms on a Moonlit River in Spring | 春江花月夜	6820346a5d175752d3009faa534f3999	@alfjones6377	2018-07-08T03:06:41Z	0	en	12
very nice. impressive. people very talented you got there in china	very nice. impressive. people very talented you got there in china	66	11	Lykgg5phVJE	Blossoms on a Moonlit River in Spring | 春江花月夜	97d47a758f96c451e073cb12aad63ac2	@oliveiraoliveira6035	2018-06-15T05:59:52Z	0	en	5
Amazing!!! Wonderful!!! Greetings from Serbia!!	Amazing!!! Wonderful!!! Greetings from Serbia!!	47	5	Lykgg5phVJE	Blossoms on a Moonlit River in Spring | 春江花月夜	50c77ef45d7175ee78d85120628d72cf	@milosbogdanovic3050	2018-06-03T20:16:27Z	0	en	9
some of this was in kung fu hustle	some of this was in kung fu hustle	34	8	Lykgg5phVJE	Blossoms on a Moonlit River in Spring | 春江花月夜	5a3eeadd7d919493fefd547e7f0404da	@gk10002000	2018-05-25T01:35:50Z	0	en	0
China was once a peaceful place.	China was once a peaceful place.	32	5	Lykgg5phVJE	Blossoms on a Moonlit River in Spring | 春江花月夜	e2a57e4bba9d50a5519c4dc314eab69d	@Clayymore007	2018-05-10T22:12:33Z	5	en	2
Yang Jing, what a beautiful music! It is more than music, you touch heaven. Remember Beijing. Da Nian Peng	Yang Jing, what a beautiful music! It is more than music, you touch heaven. Remember Beijing. Da Nian Peng	106	18	Lykgg5phVJE	Blossoms on a Moonlit River in Spring | 春江花月夜	28dbf2430d82fd6b9042e4d36207e86c	@CP-pd7fo	2018-05-03T09:51:40Z	0	en	2
Beautiful. .......best wishes from India	Beautiful. .......best wishes from India	40	5	Lykgg5phVJE	Blossoms on a Moonlit River in Spring | 春江花月夜	fd126d80467c17320edb9c22494baf3e	@s.dilipkumarsingha6494	2018-04-28T11:05:17Z	1	en	9
Does anyone know where was the venue? Could this be in Vienna?	Does anyone know where was the venue? Could this be in Vienna?	62	12	Lykgg5phVJE	Blossoms on a Moonlit River in Spring | 春江花月夜	f9c52670e4cf6b5cff25ba0204e670ec	@Yebbi-zb7jk	2018-04-03T02:18:06Z	1	en	2
those are big ass banjos...	those are big ass banjos... 😱😱	27	5	Lykgg5phVJE	Blossoms on a Moonlit River in Spring | 春江花月夜	5a0384f1ec1a847fbe7a30550bcec84a	@bubblegum2445	2018-03-17T18:40:22Z	1	en	1
Quintessentially Chinese. Hauntingly beautiful. Evokes memories of a distant place.	Quintessentially Chinese. Hauntingly beautiful. Evokes memories of a distant place.	83	9	Lykgg5phVJE	Blossoms on a Moonlit River in Spring | 春江花月夜	19a4d624247b62f4ca1180a3fee9c3a3	@Dovid2000	2018-03-09T00:09:46Z	1	en	6
This gives me chills	This gives me chills	20	4	Lykgg5phVJE	Blossoms on a Moonlit River in Spring | 春江花月夜	7173acf45f8e6ab81ed41bb0a0195628	@roxana-ambersweetman	2018-02-18T03:54:50Z	0	en	1
A feast for the eyes, the ears and the soul :)	A feast for the eyes, the ears and the soul :)	46	9	Lykgg5phVJE	Blossoms on a Moonlit River in Spring | 春江花月夜	a747cff3525129bba786319d64b016d4	@MelianTheMaia	2018-01-05T03:07:58Z	0	en	13
The flute and the pipa make it very nice music.	The flute and the pipa make it very nice music.	47	10	Lykgg5phVJE	Blossoms on a Moonlit River in Spring | 春江花月夜	590d7f6acca99a99b473509a4e044cac	@ngnichilas4277	2017-12-03T07:51:22Z	0	en	6
The defining sound of China	The defining sound of China 🇨🇳	27	5	Lykgg5phVJE	Blossoms on a Moonlit River in Spring | 春江花月夜	1a03d74c6ebcee090ddf91c48655d81f	@TheOracle1814	2017-10-29T17:38:11Z	1	en	11
it s, wery good,	it s, wery good,	16	3	Lykgg5phVJE	Blossoms on a Moonlit River in Spring | 春江花月夜	b7906a5645c21d6827b99d8d97de8ad8	@igorheric1082	2017-10-07T13:48:13Z	0	en	7
WAUUUU,VERY NICE	WAUUUU,VERY NICE	16	3	Lykgg5phVJE	Blossoms on a Moonlit River in Spring | 春江花月夜	3bc5215c493394262020940e682dfbf1	@leventveziroglu2097	2017-10-06T07:55:23Z	0	en	8
Music is great. The costumes are beautiful. The ladies are beautiful. Perfect.	Music is great. The costumes are beautiful. The ladies are beautiful. Perfect.	78	12	Lykgg5phVJE	Blossoms on a Moonlit River in Spring | 春江花月夜	1cc739b45d15fbc26f35bbcaea823c10	@steamriceroll	2017-07-27T01:27:37Z	0	en	18
Very beautiful and the music is very good too,Any one from china want to talk give me a shout.	Very beautiful and the music is very good too,Any one from china want to talk give me a shout.	94	19	Lykgg5phVJE	Blossoms on a Moonlit River in Spring | 春江花月夜	88454753a9aa57f4f8b4d519461c9ec4	@newton18311	2017-07-22T16:15:16Z	1	en	13
Recorded nearly 20 years ago, listened so many times, it's still so overwhelming.	Recorded nearly 20 years ago, listened so many times, it's still so overwhelming.	81	13	Lykgg5phVJE	Blossoms on a Moonlit River in Spring | 春江花月夜	67a583a69e1fdb974d94d37f807171dd	@guominzhu255	2017-07-18T15:11:19Z	0	en	18
The ladies in white blouse and blue blouse are GREAT. What are their names???	The ladies in white blouse and blue blouse are GREAT. What are their names???	77	14	Lykgg5phVJE	Blossoms on a Moonlit River in Spring | 春江花月夜	88bf3c0e662aca6657ba4d207cd24e4e	@steamriceroll	2017-07-14T03:08:46Z	1	en	3
Where did the second Gu Zheng player vanish to?	Where did the second Gu Zheng player vanish to?	47	9	Lykgg5phVJE	Blossoms on a Moonlit River in Spring | 春江花月夜	14a90860cc8abe8634f29cc970227336	@MacEoin	2017-06-11T21:37:40Z	0	en	3
somebody sneezed at ?	somebody sneezed at 3:43?	21	3	Lykgg5phVJE	Blossoms on a Moonlit River in Spring | 春江花月夜	efb6a44381197f45fd79e34bb182e17a	@magdalene512	2017-06-07T04:03:00Z	1	en	3
This is from the 80s for sure...the fringe says it all!	This is from the 80s for sure...the fringe says it all!	55	12	Lykgg5phVJE	Blossoms on a Moonlit River in Spring | 春江花月夜	c056ac7557b95254b36fd3cd53da9ad3	@wink768	2017-06-05T06:36:41Z	1	en	3
FIRST RATE MUSIC: Masterful and accomplished - conjuring up feelings of tranquillity, peace and contentment. A visual delight with exquisite costumes, abundant grace in the execution of the movements, a bouquet of musical colour and tremulous nostalgia. THANK YOU	FIRST RATE MUSIC: Masterful and accomplished - conjuring up feelings of tranquillity, peace and contentment. A visual delight with exquisite costumes, abundant grace in the execution of the movements, a bouquet of musical colour and tremulous nostalgia. THANK YOU	263	36	Lykgg5phVJE	Blossoms on a Moonlit River in Spring | 春江花月夜	bf5406c504b44c8f2d1bbdeb49b01706	@juliajanssens8432	2017-05-13T14:11:40Z	6	en	34
No western instruments to muddy the performance, excellent!	No western instruments to muddy the performance, excellent!	59	8	Lykgg5phVJE	Blossoms on a Moonlit River in Spring | 春江花月夜	958c11ec9a7d8e0050863f95d5e5aa67	@pauljmeyer1	2017-04-22T06:35:54Z	3	en	16
I keep coming back for this.	I keep coming back for this.	28	5	Lykgg5phVJE	Blossoms on a Moonlit River in Spring | 春江花月夜	d5727edc956c5f722f9134412776fa91	@azn0180	2017-04-20T14:18:41Z	0	en	4
so refined and elegant!	so refined and elegant!	23	4	Lykgg5phVJE	Blossoms on a Moonlit River in Spring | 春江花月夜	6276597f051b71361d35a6f846b9d2fd	@MrJerryleyva	2017-04-03T18:25:58Z	0	en	4
Amazing music & musicians ! Beautiful !	Amazing music & musicians ! Beautiful !	39	4	Lykgg5phVJE	Blossoms on a Moonlit River in Spring | 春江花月夜	efab5df81b0200446fd4fde49f0b7530	@drpaultse	2017-02-18T21:54:59Z	0	en	5
I like this video, I have watched this video 10 times already. Thanks.	I like this video, I have watched this video 10 times already. Thanks.	70	11	Lykgg5phVJE	Blossoms on a Moonlit River in Spring | 春江花月夜	542baac271aed163e50ab7c4e391f7b0	@steamriceroll	2017-02-14T23:41:24Z	0	en	7
One of the strings was broken of the main player in . Yet still fabulus!	One of the strings was broken of the main player in 6:25. Yet still fabulus!	72	14	Lykgg5phVJE	Blossoms on a Moonlit River in Spring | 春江花月夜	f06c24199b0be9e4be72661fd5118370	@maizer4679	2016-11-12T17:03:08Z	0	en	4
Beautiful music, the lead pipa player is quite something, very emotional and good musicianship!	Beautiful music, the lead pipa player is quite something, very emotional and good musicianship!	95	14	Lykgg5phVJE	Blossoms on a Moonlit River in Spring | 春江花月夜	0ffd19b1844d356281b5a2bf250ae93f	@justinpenney-88	2016-11-10T06:23:54Z	0	en	4
melodies ana beautiful	melodies ana beautiful	22	3	Lykgg5phVJE	Blossoms on a Moonlit River in Spring | 春江花月夜	0bc948dae510efad0da7eb0389857c2f	@madhavi8630	2016-11-09T15:44:52Z	0	en	3
not just beautiful music , they all beautiful as well , well done n thank you for posting the play	not just beautiful music , they all beautiful as well , well done n thank you for posting the play	98	17	Lykgg5phVJE	Blossoms on a Moonlit River in Spring | 春江花月夜	61c82fe4287e434e84c5b999a8a3048a	@hermanchow1405	2016-10-02T23:32:33Z	0	en	3
The best misc .i'm Sokkheng is have the best	The best misc .i'm Sokkheng is have the best	44	8	Lykgg5phVJE	Blossoms on a Moonlit River in Spring | 春江花月夜	8a9e08c33059aa9c42a84b14cd3e7f47	@sokkhengnelsonleang365	2016-08-29T06:50:33Z	0	en	2
listening to these music provide harmony n peace in heart n mind,very comfortable....	listening to these music provide harmony n peace in heart n mind,very comfortable....	85	12	Lykgg5phVJE	Blossoms on a Moonlit River in Spring | 春江花月夜	b8d7e8613fa7497de12c84ff88dae050	@neuplextechnologies6973	2016-07-29T09:35:27Z	0	en	3
Splendid sound of China!	Splendid sound of China!	24	4	Lykgg5phVJE	Blossoms on a Moonlit River in Spring | 春江花月夜	df51431afa660ba0ee098fc92f6c673b	@2080justin	2016-07-20T12:14:55Z	0	en	4
wow no 1 music , i like this alot	wow no 1 music , i like this alot	33	6	Lykgg5phVJE	Blossoms on a Moonlit River in Spring | 春江花月夜	bcf9ef35f4d55d81596531e12dfdba41	@phanvan9628	2016-06-26T08:44:06Z	0	en	1
I feel like the woman blowing the flute isn't using a lot of air	I feel like the woman blowing the flute isn't using a lot of air	64	12	Lykgg5phVJE	Blossoms on a Moonlit River in Spring | 春江花月夜	d20a41c502e4a8fd4afd00f715981d32	@sherriel.7233	2016-06-21T02:09:38Z	0	en	1
what a wonderful piece of art!	what a wonderful piece of art!	30	5	Lykgg5phVJE	Blossoms on a Moonlit River in Spring | 春江花月夜	97d54396fc816677f2a727b33f3061b7	@drjoshuyt	2016-05-24T17:28:22Z	0	en	2
isn't this first song on the soundtrack for Kung Fu Hustle, which did have a few other classical pieces?	isn't this first song on the soundtrack for Kung Fu Hustle, which did have a few other classical pieces?	104	18	Lykgg5phVJE	Blossoms on a Moonlit River in Spring | 春江花月夜	fb7abd799728f00e0c0290386e96165c	@gk10002000	2016-05-16T18:03:14Z	0	en	1
Great musical number from Southern China	Great musical number from Southern China	40	6	Lykgg5phVJE	Blossoms on a Moonlit River in Spring | 春江花月夜	fee5c9f47e54e43164eef1ba467c53ec	@datosteveyap	2016-03-06T16:55:36Z	0	en	3
beautiful ladies, beautiful colours, soulful music, wonderful place.	beautiful ladies, beautiful colours, soulful music, wonderful place.	68	8	Lykgg5phVJE	Blossoms on a Moonlit River in Spring | 春江花月夜	b3a5c9497e3c109ebd16b22f156910f1	@amitnarayankar	2016-01-27T18:03:32Z	0	en	1
the meditative music composition on shakuhachi flute, for the harmony and healing	the meditative music composition on shakuhachi flute, for the harmony and healing https://www.youtube.com/watch?v=AyzFEK_Sbds	81	12	Lykgg5phVJE	Blossoms on a Moonlit River in Spring | 春江花月夜	cb9d602f14bc63200382d65d4bbdf744	@alexanderkaplan2934	2016-01-18T13:50:41Z	0	en	0
what kind of flue is that?	what kind of flue is that?	26	6	Lykgg5phVJE	Blossoms on a Moonlit River in Spring | 春江花月夜	05ba8d509d6b1771cae52e0e84c2df05	@niceveraert1000	2016-01-02T03:55:59Z	1	en	1
The Arts play such an important part in social capital. Precious beyond words.	The Arts play such an important part in social capital. Precious beyond words.	78	13	Lykgg5phVJE	Blossoms on a Moonlit River in Spring | 春江花月夜	5c099077e1c1589c7250b086e4316ebc	@pauljmeyer1	2015-11-16T07:09:04Z	0	en	4
A traditional Chinese orchestra made up of purely women musicians !! Beautiful masterpiece performed gracefully & elegantly !! Both the pipa & xiao soloists are excellent - They have superb control of all the nuances throughout the music.	A traditional Chinese orchestra made up of purely women musicians !! Beautiful masterpiece performed gracefully & elegantly !! Both the pipa & xiao soloists are excellent - They have superb control of all the nuances throughout the music.	238	32	Lykgg5phVJE	Blossoms on a Moonlit River in Spring | 春江花月夜	8df54f8e62bd585d77565544a63a3c6e	@BlessAllKC	2015-11-14T06:21:50Z	0	en	7
This is Chinese music !	This is Chinese music !	23	4	Lykgg5phVJE	Blossoms on a Moonlit River in Spring | 春江花月夜	65bba9f05c34e54f7cb91e1e548eb8da	@mangoldy4903	2015-11-12T07:48:33Z	0	en	3
Is there anywhere in uk that this is performed?	Is there anywhere in uk that this is performed?	47	9	Lykgg5phVJE	Blossoms on a Moonlit River in Spring | 春江花月夜	44c48897a532a4f5176b00bfc972d0d9	@maddemo8574	2015-10-31T01:49:58Z	0	en	1
I like the white blouse, very pretty and not too tight, very comfortable.	I like the white blouse, very pretty and not too tight, very comfortable.	73	12	Lykgg5phVJE	Blossoms on a Moonlit River in Spring | 春江花月夜	eed8028d37ff31f1dd66edaddc21d61e	@steamriceroll	2015-09-25T03:35:42Z	0	en	2
Wonderful creations of the best songs	Wonderful creations of the best songs	37	6	Lykgg5phVJE	Blossoms on a Moonlit River in Spring | 春江花月夜	ead01ca6e5f0e42b0e88461dcca4cdf3	@toypop121	2015-08-23T06:51:09Z	0	en	0
Great music! I am mesmerised by the two beautiful ladies playing the flute and the pipa. Their movements are so captivating!	Great music! I am mesmerised by the two beautiful ladies playing the flute and the pipa. Their movements are so captivating!	124	20	Lykgg5phVJE	Blossoms on a Moonlit River in Spring | 春江花月夜	3e1743997e0efb569042e3f66a2ce24c	@wuanthongonn3482	2015-08-22T14:32:02Z	0	en	1
YEAH! ! SHRED IT! ! ! \m/	2:14 YEAH! ! SHRED IT! ! ! \m/	25	3	Lykgg5phVJE	Blossoms on a Moonlit River in Spring | 春江花月夜	4eb99514201303370c2b998f6627bd86	@RenRenRan	2015-08-16T17:30:26Z	0	en	0
what is the instrument of the time please help :(	what is the instrument of the time 2:20 please help :(	49	9	Lykgg5phVJE	Blossoms on a Moonlit River in Spring | 春江花月夜	5540c1c56b94947906615c973917db94	@Damocles4500	2015-07-13T03:43:42Z	1	en	0
Unreal... Superb... what a music, thank you China	Unreal... Superb... what a music, thank you China	49	7	Lykgg5phVJE	Blossoms on a Moonlit River in Spring | 春江花月夜	48be492043fa3e1323dbf007535764b7	@rafaeld.2554	2015-07-13T03:36:49Z	0	en	1
Here is a video of the oldest known recording of this piece, performed by the Datong Club (大同乐会) of Shanghai, probably dating to the early 1930s:	Here is a video of the oldest known recording of this piece, performed by the Datong Club (大同乐会) of Shanghai, probably dating to the early 1930s:https://www.youtube.com/watch?v=PMrrq6B50cg	145	28	Lykgg5phVJE	Blossoms on a Moonlit River in Spring | 春江花月夜	b362975cc7fd1e607fa0cbe89cdd68d4	@dbadagna	2015-06-01T07:05:28Z	0	en	0
Beautiful girls in beautiful dress play beautiful music what more can you want for?	Beautiful girls in beautiful dress play beautiful music what more can you want for?	83	14	Lykgg5phVJE	Blossoms on a Moonlit River in Spring | 春江花月夜	d87d66f8bc4f34ae330a90997eabf5fb	@herbertwechsler3442	2015-05-03T11:30:52Z	0	en	0
Oh, this was so beautiful! I am a 76 year old American man and I was just overcome by this wonderful music. I stumbled on it as I went through some of the You Tube music videos. I so hope these artist are still performing and I wish someday they could find their way to Arizona to perform!	Oh, this was so beautiful! I am a 76 year old American man and I was just overcome by this wonderful music. I stumbled on it as I went through some of the You Tube music videos. I so hope these artist are still performing and I wish someday they could find their way to Arizona to perform!	292	51	Lykgg5phVJE	Blossoms on a Moonlit River in Spring | 春江花月夜	e81d66557e95fbd5b3d49198359ab928	@richardsmith8210	2015-03-02T06:20:55Z	0	en	0
Nice Music! But Someone sneezed at ! Haha.	Nice Music! But Someone sneezed at 3:43! Haha.	42	7	Lykgg5phVJE	Blossoms on a Moonlit River in Spring | 春江花月夜	8f1b32b21e3cfad6d7409fd960705e67	@richmondbacus1206	2015-02-18T16:33:44Z	0	en	0
Does anyone know what key this is in?	Does anyone know what key this is in?	37	8	Lykgg5phVJE	Blossoms on a Moonlit River in Spring | 春江花月夜	470b815a8257179bad1a8fe14b7b4564	@TheSebbbeh	2015-02-17T05:01:33Z	0	en	0
i could listen to this type of music all day long,it's very soothing	i could listen to this type of music all day long,it's very soothing	68	13	Lykgg5phVJE	Blossoms on a Moonlit River in Spring | 春江花月夜	e7dd916131a23dc204ba1c7e2ac5aae4	@adambeauregard2299	2015-01-31T21:22:20Z	0	en	1
It is an impeccable music.	It is an impeccable music.	26	5	Lykgg5phVJE	Blossoms on a Moonlit River in Spring | 春江花月夜	3cdf72ee0c80d54d8672f074e4a17549	@musicappealing1836	2015-01-29T15:13:03Z	0	en	1
Dat woodblock tap caused somebody to sneeze! :D	3:42 Dat woodblock tap caused somebody to sneeze! :D	47	7	Lykgg5phVJE	Blossoms on a Moonlit River in Spring | 春江花月夜	3d171ce2722d5c907d472e96282cd476	@scarletnocturne	2015-01-26T22:12:36Z	0	en	0
See? Women are best, the rest is just bullshit! I want to give them each a big hug!	See? Women are best, the rest is just bullshit! I want to give them each a big hug!	83	16	Lykgg5phVJE	Blossoms on a Moonlit River in Spring | 春江花月夜	1e6f0993099cc7ce004b70cb0a490b00	@pizmiov	2015-01-09T00:56:45Z	0	en	0
Awkward loud sneeze? xD	3:41 Awkward loud sneeze? xD	23	4	Lykgg5phVJE	Blossoms on a Moonlit River in Spring | 春江花月夜	38ccec0586d6f4bbaf276c7a7c8fd85b	@PlatonicPurplePanda	2014-12-18T17:29:26Z	0	en	0
http 2014117amyapple9 akpc BLOOSSOMS ON A MOONLIT RIVER SPRING	http 2014117amyapple9 akpc BLOOSSOMS ON A MOONLIT RIVER SPRING	63	9	Lykgg5phVJE	Blossoms on a Moonlit River in Spring | 春江花月夜	744e1ff2ecbd504a789bc216ef2613ab	@amychin-atkins9804	2014-11-07T10:43:45Z	0	en	0
Lovely melody, very Classical Chinese music, evoking dynastic palace life of glory and sentiment.	Lovely melody, very Classical Chinese music, evoking dynastic palace life of glory and sentiment.	97	14	Lykgg5phVJE	Blossoms on a Moonlit River in Spring | 春江花月夜	4f9e46ca42f3e77df78cced8351ecdce	@Imageli8	2014-09-13T05:38:20Z	0	en	0
good music; gaudy outfits	good music; gaudy outfits	25	4	Lykgg5phVJE	Blossoms on a Moonlit River in Spring | 春江花月夜	bb731e6354a157e3496c792007b9a8f2	@ashaj7095	2014-09-13T04:35:37Z	0	en	0
From the clothing, to the beautiful women and most excellent music played by equally excellent orchestra. 5 * * * * * for this video.	From the clothing, to the beautiful women and most excellent music played by equally excellent orchestra. 5 * * * * * for this video.	134	19	Lykgg5phVJE	Blossoms on a Moonlit River in Spring | 春江花月夜	d1424a513e0b1db4731275c87f84311e	@colliecandle	2014-09-12T22:01:49Z	0	en	0
can someone tell me the name of this group in english? They are amazing!	can someone tell me the name of this group in english? They are amazing!	72	14	Lykgg5phVJE	Blossoms on a Moonlit River in Spring | 春江花月夜	ded2f1833b454f18bd3820b4daf3144a	@eldrow	2014-08-28T17:09:09Z	0	en	0
My favorite piece of Chinese music. But the costume is a fault, very inappropriate, and it's a distract for the music.	My favorite piece of Chinese music. But the costume is a fault, very inappropriate, and it's a distract for the music.	118	19	Lykgg5phVJE	Blossoms on a Moonlit River in Spring | 春江花月夜	2d1ca1455b26d2799e4f2a013cae2caa	@yanliu2352	2014-08-26T05:39:35Z	0	en	0
D'oh!One small thing that's not mentioned by hacon, the poster, is thatThis performance was in the "Great Hall" (Großer Saal) Wiener Musikverein (Viennese Music Association), commonly shortened to Musikverein, is a concert hall in the Innere Stadt borough of Vienna, Austria. It is ONLY the home to the Vienna Philharmonic Orchestra.	D'oh!One small thing that's not mentioned by hacon, the poster, is thatThis performance was in the "Great Hall" (Großer Saal) Wiener Musikverein (Viennese Music Association), commonly shortened to Musikverein, is a concert hall in the Innere Stadt borough of Vienna, Austria. It is ONLY the home to the Vienna Philharmonic Orchestra.	333	52	Lykgg5phVJE	Blossoms on a Moonlit River in Spring | 春江花月夜	9f50563a4d31bd4332e4d029d9e69fa4	@flungingpictures	2014-08-25T08:31:32Z	0	en	0
Thank you . Wunderful	Thank you . Wunderful	21	3	Lykgg5phVJE	Blossoms on a Moonlit River in Spring | 春江花月夜	b80f46006f0e44974587f06aa2b76176	@OlgaNovakauskiene	2014-08-02T09:04:21Z	0	en	2
Really cool relaxing music , is this what they listen to while in the opium dens	Really cool relaxing music , is this what they listen to while in the opium dens	80	15	Lykgg5phVJE	Blossoms on a Moonlit River in Spring | 春江花月夜	8120d363ad5c841956f04d01c4eb4f6c	@fryman1369	2014-07-03T18:29:30Z	0	en	0
wish music over here was this pure	wish music over here was this pure	34	7	Lykgg5phVJE	Blossoms on a Moonlit River in Spring | 春江花月夜	cabb26253fe315f3cdec690e3b2831a3	@chillydraco9838	2014-06-22T03:04:07Z	0	en	0
I'm usually not a fan of Japanese cultural music, but that was really good!	I'm usually not a fan of Japanese cultural music, but that was really good!	75	12	Lykgg5phVJE	Blossoms on a Moonlit River in Spring | 春江花月夜	0719bf726e6bf3c7c863d134c31cdd67	@AceFuzzLord	2014-06-21T18:46:24Z	1	en	0
oh bow wow bow wow wow bow wow bow wow bow wow wow! WOW!	oh bow wow bow wow wow bow wow bow wow bow wow wow! WOW!	56	14	Lykgg5phVJE	Blossoms on a Moonlit River in Spring | 春江花月夜	3a1ee3c47537a7c2a66877b997bfd30e	@bobhedstrom	2014-06-04T22:41:43Z	0	en	0
I wish I can hug everyone of them and tell them thank you so much for the wonderful music you make	I wish I can hug everyone of them and tell them thank you so much for the wonderful music you make	98	19	Lykgg5phVJE	Blossoms on a Moonlit River in Spring | 春江花月夜	ad85f6ffc79a7f8bd8be27c2d505c512	@millicent1990	2014-06-01T23:14:16Z	0	en	0
Music of a non-common smooth and sophisticated beauty.	Music of a non-common smooth and sophisticated beauty.	54	8	Lykgg5phVJE	Blossoms on a Moonlit River in Spring | 春江花月夜	76828827a40ae6e8d4f3d5ba18c7c5d9	@Davccelion	2014-05-28T12:17:31Z	0	en	0
if you know anybody who is thinking of committing suicide, just let him/her listen to this tune, they will no longer want to do it after listening, as they will realize how beautiful life and the world are, regardless of some problems and trials.	if you know anybody who is thinking of committing suicide, just let him/her listen to this tune, they will no longer want to do it after listening, as they will realize how beautiful life and the world are, regardless of some problems and trials.	246	45	Lykgg5phVJE	Blossoms on a Moonlit River in Spring | 春江花月夜	bdab550841b15bd8d7168b59c1d3e051	@gnehzeey	2014-05-21T05:37:18Z	0	en	0
I hate that sneeze .	I hate that sneeze .	20	3	Lykgg5phVJE	Blossoms on a Moonlit River in Spring | 春江花月夜	515f713ae336e273586b33888b92a69c	@kevinf5354	2014-05-19T20:35:29Z	0	en	0
I prefer this piece to be played by Pipa, Ko Cheng & Erhu.....more peaceful and pleasing to listen and enjoy. The "Return of the Fisherman" is another well known piece to listen and so is "Liang Zhu" or Butterfly Love. Search for them to have the beauty of listening.	I prefer this piece to be played by Pipa, Ko Cheng & Erhu.....more peaceful and pleasing to listen and enjoy. The "Return of the Fisherman" is another well known piece to listen and so is "Liang Zhu" or Butterfly Love. Search for them to have the beauty of listening.	269	48	Lykgg5phVJE	Blossoms on a Moonlit River in Spring | 春江花月夜	41104fcb9b71c69e8837aa03274ca64b	@12arthurlee	2014-05-17T07:52:14Z	0	en	0
What's the name of the large bowed instruments in the back?	What's the name of the large bowed instruments in the back?	59	11	Lykgg5phVJE	Blossoms on a Moonlit River in Spring | 春江花月夜	a14a13ca0376a8114b7e3d80db32070e	@arievvdv	2014-05-11T23:46:06Z	0	en	0
very good , love this music,	very good , love this music,	28	5	Lykgg5phVJE	Blossoms on a Moonlit River in Spring | 春江花月夜	a9995f8efc9843eacd53423bcfe3b49f	@rodgerneal6128	2014-05-10T23:38:21Z	0	en	0
This is the same version played at the Summer Palace!	This is the same version played at the Summer Palace!	53	10	Lykgg5phVJE	Blossoms on a Moonlit River in Spring | 春江花月夜	d35d8ccacd73246b848c47f7e65437ce	@orevwa	2014-04-17T01:52:08Z	1	en	1
for me, this music brings the beauty of breath, love and longing. just gorgeous!!	for me, this music brings the beauty of breath, love and longing. just gorgeous!!	81	14	Lykgg5phVJE	Blossoms on a Moonlit River in Spring | 春江花月夜	6b47add41d9adb2bba9a12a425e5d59a	@sharonazar1	2014-04-03T03:05:07Z	0	en	0
+ahmed alireza, so cute n humorous comments! Makes me chuckle v loudly	+ahmed alireza, so cute n humorous comments! Makes me chuckle v loudly	70	10	Lykgg5phVJE	Blossoms on a Moonlit River in Spring | 春江花月夜	d6bbf9df372c7a16d79e18d34be6f04a	@aryanhan506	2014-02-25T05:52:02Z	0	en	2
Soooo refined, elegant n beautiful. What a treat to the ears	Soooo refined, elegant n beautiful. What a treat to the ears	60	9	Lykgg5phVJE	Blossoms on a Moonlit River in Spring | 春江花月夜	f36508949477675d5e2d8609e8e7639b	@aryanhan506	2014-02-25T05:45:37Z	0	en	53
very nice video that I like !have a nice weekend !	very nice video that I like !have a nice weekend !	50	8	Lykgg5phVJE	Blossoms on a Moonlit River in Spring | 春江花月夜	273194a27290c5d101f4d172b4a6d353	@nutier	2014-01-25T20:40:38Z	1	en	19
Beautiful music played by beautiful musicians	Beautiful music played by beautiful musicians	45	6	Lykgg5phVJE	Blossoms on a Moonlit River in Spring | 春江花月夜	1e8c86757d1093b7ae1513bfa1e5e906	@johnmcmurran	2014-01-21T21:27:52Z	1	en	30
my favorit song.............	my favorit song.............	28	3	Lykgg5phVJE	Blossoms on a Moonlit River in Spring | 春江花月夜	4231e64a738051b609e49606dd98e4da	@sujantohalim2409	2014-01-19T10:49:18Z	0	en	7
the best Chinese ancient tune ever,i have heard many times,it make me relax and forget the disputes.	the best Chinese ancient tune ever,i have heard many times,it make me relax and forget the disputes.	100	18	Lykgg5phVJE	Blossoms on a Moonlit River in Spring | 春江花月夜	073d9e8f165ff7a924a0b141346521c4	@hdhsdebendan	2013-10-19T17:44:28Z	0	en	3
Very lovely music --well played. Reminds me a little of the famous Fujian Quanzhou Nanying ..1	Very lovely music --well played. Reminds me a little of the famous Fujian Quanzhou Nanying ..1	94	14	Lykgg5phVJE	Blossoms on a Moonlit River in Spring | 春江花月夜	41fcb768914d7e55fb6fa66a05ee563c	@lesterh100	2013-09-20T17:45:48Z	0	en	1
Whow... from minute on... that part... whow..	Whow... from minute 3:12 on... that part... whow..	45	7	Lykgg5phVJE	Blossoms on a Moonlit River in Spring | 春江花月夜	52499f679ecf714c6a925854289f6cc1	@AbraxasLalee	2013-09-19T19:21:24Z	0	en	0
guys, stop fussing. i think its beautiful and the clothes too u just have to look at the clothes seperately	guys, stop fussing. i think its beautiful and the clothes too u just have to look at the clothes seperately	107	18	Lykgg5phVJE	Blossoms on a Moonlit River in Spring | 春江花月夜	fe7a7a6a67f291b392a10e8991826f3f	@alicewang3298	2013-09-15T17:54:00Z	1	en	0
compare this to rap music and all rappers shpould be gathered and put in mental institutions.....lol	compare this to rap music and all rappers shpould be gathered and put in mental institutions.....lol	100	17	Lykgg5phVJE	Blossoms on a Moonlit River in Spring | 春江花月夜	a943946b8db29859af91a53aa32e2640	@afaf233	2013-09-11T09:43:19Z	0	en	5
Music,you know?	Music,you know?	15	3	Lykgg5phVJE	Blossoms on a Moonlit River in Spring | 春江花月夜	d03c7cf742ed30101378a5421c699467	@尹俄白-q4g	2013-09-05T21:17:33Z	0	en	1
and extraterrestrials create your gods	and extraterrestrials create your gods	38	5	Lykgg5phVJE	Blossoms on a Moonlit River in Spring | 春江花月夜	c3695ffd099e847545263273dfe49ed2	@AKDGsonic	2013-08-29T14:58:44Z	0	en	0
what are you talking about here?. No religion please.! Leave your religion at home. You are in a concert hall. Enjoy it.	what are you talking about here?. No religion please.! Leave your religion at home. You are in a concert hall. Enjoy it.	120	21	Lykgg5phVJE	Blossoms on a Moonlit River in Spring | 春江花月夜	0079bd715cf56dcf99b4ca6af3090c3a	@swsanglee3921	2013-08-20T09:37:20Z	0	en	2
The more I hear this beautiful music,the more I love it.	The more I hear this beautiful music,the more I love it.	56	10	Lykgg5phVJE	Blossoms on a Moonlit River in Spring | 春江花月夜	0773a7b9ef0b9c22cac7f626403c31ef	@scychan01	2013-08-03T05:34:54Z	0	en	1
Beautiful! I love chinese songs! All the instruments are traditional and your sounds are from the human soul!! Thank you for this video!	Beautiful! I love chinese songs! All the instruments are traditional and your sounds are from the human soul!! Thank you for this video!	136	22	Lykgg5phVJE	Blossoms on a Moonlit River in Spring | 春江花月夜	32c98d5c08d6414aa4905fcc6fe1bd87	@teresacristinamissflute	2013-07-09T02:10:29Z	0	en	7
Unfortunately I can't read the chinese character....	Unfortunately I can't read the chinese character....	52	6	Lykgg5phVJE	Blossoms on a Moonlit River in Spring | 春江花月夜	66447c74e297d59e110135ff4dc2446d	@KySiumah	2013-06-28T03:18:58Z	0	en	1
What a beautiful piece of music, performed by two top artists from China.	What a beautiful piece of music, performed by two top artists from China.	73	12	Lykgg5phVJE	Blossoms on a Moonlit River in Spring | 春江花月夜	bfdfcb6627c83fab27f2bfe469535069	@geoffhung1560	2013-06-25T15:48:49Z	0	en	13
Classical... How To Play... Fully The Instruments...	Classical... How To Play... Fully The Instruments...	52	7	Lykgg5phVJE	Blossoms on a Moonlit River in Spring | 春江花月夜	07c834f63ec3d363fd0b452c914dfa17	@v12v12v12v12	2013-06-11T05:14:45Z	0	en	0
Wow... Might be chinese.... this music bring me to state ofBuddha for a moment.	Wow... Might be chinese.... this music bring me to state ofBuddha for a moment.	79	13	Lykgg5phVJE	Blossoms on a Moonlit River in Spring | 春江花月夜	bbbabc6e7d836805695279ea74c91248	@paddisha	2013-05-01T15:41:30Z	0	en	2
Ee Rou Ee Kang Strong followed by smooth soft music Nice	Ee Rou Ee Kang Strong followed by smooth soft music Nice	56	11	Lykgg5phVJE	Blossoms on a Moonlit River in Spring | 春江花月夜	fddbcda5d4787d97f5d3fbcedc765602	@leoyts9945	2013-04-26T07:19:44Z	0	en	0
does anyone know who is the guzheng player?	does anyone know who is the guzheng player?	43	8	Lykgg5phVJE	Blossoms on a Moonlit River in Spring | 春江花月夜	73938a26a334a89b0e9ab48610c891d1	@ValiantEast	2013-01-31T06:14:46Z	1	en	0
Xiexie..Love it	Xiexie..Love it	15	3	Lykgg5phVJE	Blossoms on a Moonlit River in Spring | 春江花月夜	9f281eecb7083b0ce5b5ed90499c758d	@sajidullah	2013-01-10T00:26:39Z	0	en	0
thanks for uploading...i love this piece.	thanks for uploading...i love this piece.	41	6	Lykgg5phVJE	Blossoms on a Moonlit River in Spring | 春江花月夜	fa7d9d0b2ab88a83621de64c5e32ea7e	@ValiantEast	2012-12-23T08:35:32Z	0	en	0
Thanks for uploading...simply magnificent.	Thanks for uploading...simply magnificent.	42	5	Lykgg5phVJE	Blossoms on a Moonlit River in Spring | 春江花月夜	ca4ad7e7262c6e572398188fb307bcde	@ValiantEast	2012-12-15T08:59:26Z	0	en	0
I am a Yang Style T'ai Chi Chuan instructor here in the States - I would love to buy a CD of this music - where - so exquisite!!!!!!!!!!!	I am a Yang Style T'ai Chi Chuan instructor here in the States - I would love to buy a CD of this music - where - so exquisite!!!!!!!!!!!	137	22	Lykgg5phVJE	Blossoms on a Moonlit River in Spring | 春江花月夜	59e3d0cf9bd4e8b8115e3dabfc5f0ece	@fergarte9	2012-12-03T14:21:21Z	0	en	1
Real talk this some good shit. I hear truth and life in this music.	Real talk this some good shit. I hear truth and life in this music.	67	13	Lykgg5phVJE	Blossoms on a Moonlit River in Spring | 春江花月夜	770d544beca418857b83268903c2cea0	@Blastoffteddy25	2012-11-25T05:37:43Z	0	en	0
such beautiful music...chinese's finest hour.	such beautiful music...chinese's finest hour.	45	6	Lykgg5phVJE	Blossoms on a Moonlit River in Spring | 春江花月夜	7ad39919839fa5771ee323989cbcc1ea	@ValiantEast	2012-11-16T04:40:06Z	0	en	0
Very lovely Traditional Music so Brilliantly played! Thank you for up-loading!	Very lovely Traditional Music so Brilliantly played! Thank you for up-loading!	78	12	Lykgg5phVJE	Blossoms on a Moonlit River in Spring | 春江花月夜	3ec21106c24aefbd730f1502cad6de4e	@nancythefanciful	2012-11-04T15:22:38Z	0	en	0
@StephanusTacitus sadly not. unlike western compositions, most ancient chinese songs were lost over the years since they didnt really bother keeping them. so its almost impossible to tell where and when the song came from by just listening to the tune and texture like western songs	@StephanusTacitus sadly not. unlike western compositions, most ancient chinese songs were lost over the years since they didnt really bother keeping them. so its almost impossible to tell where and when the song came from by just listening to the tune and texture like western songs	282	46	Lykgg5phVJE	Blossoms on a Moonlit River in Spring | 春江花月夜	fd0209c6727dd22e8fb5af0c66613132	@h0710118	2012-10-08T16:04:46Z	0	en	0
Very beautiful dress. The music is even more beautiful. I have viewed this video many time.	Very beautiful dress. The music is even more beautiful. I have viewed this video many time.	91	15	Lykgg5phVJE	Blossoms on a Moonlit River in Spring | 春江花月夜	fbda93b51c29dcd752d8a05e6e1896bd	@steamriceroll	2012-09-23T01:58:28Z	0	en	0
Awesome ! WTF ! I Love It !	Awesome ! WTF ! I Love It !	27	4	Lykgg5phVJE	Blossoms on a Moonlit River in Spring | 春江花月夜	64ac6b2d2ae7a3c76acd834080e23898	@ry228168136	2012-07-24T18:49:58Z	0	en	0
one of the most beautiful performances of music i have ever heard	one of the most beautiful performances of music i have ever heard	65	11	Lykgg5phVJE	Blossoms on a Moonlit River in Spring | 春江花月夜	f7b734448dcbcf1db1e59a2dcdc1dfd5	@milkycooler	2012-07-14T20:20:37Z	0	en	0
Your comments makes me impotence.	Your comments makes me impotence.	33	5	Lykgg5phVJE	Blossoms on a Moonlit River in Spring | 春江花月夜	2296e31ee7e6e3f642ff8319a391af22	@LillianHsieh333	2012-04-13T16:14:10Z	0	en	0
When it comes to making music that evokes the very soul of the earth, the chinese do it best.	When it comes to making music that evokes the very soul of the earth, the chinese do it best.	93	19	Lykgg5phVJE	Blossoms on a Moonlit River in Spring | 春江花月夜	f5d7e2bc90e0b791452a3736293a62b2	@UninspiredFilm5	2012-03-18T04:19:36Z	0	en	0
I guess this is one of the five videos China allows from YouTube	I guess this is one of the five videos China allows from YouTube	64	12	Lykgg5phVJE	Blossoms on a Moonlit River in Spring | 春江花月夜	ed54c908141a44df2c8d7817f1bd5e0a	@jerryfinsternumber9	2012-03-16T00:21:19Z	0	en	0
@jyou2605 Thank you for the background story.	@jyou2605 Thank you for the background story.	45	8	Lykgg5phVJE	Blossoms on a Moonlit River in Spring | 春江花月夜	1a2120a2c066b4d7c386e577fb4f9e56	@stanstead74	2012-03-05T08:32:05Z	0	en	0
I like their custume and make up very traditional - I so dislike tradtional musicians dress in modern gowns with slits and low V playing traditional chinese songs. Love this 101%.	I like their custume and make up very traditional - I so dislike tradtional musicians dress in modern gowns with slits and low V playing traditional chinese songs. Love this 101%.	179	27	Lykgg5phVJE	Blossoms on a Moonlit River in Spring | 春江花月夜	b33ab5070265863469b1991b6ff14f8a	@tsanlc	2012-02-17T15:57:21Z	0	en	0
OMG, this is one of the best renditions I've ever heard in a long while. So pure and succinct. Wonderful job all. Wish this orchestra would travel to my part of town.	OMG, this is one of the best renditions I've ever heard in a long while. So pure and succinct. Wonderful job all. Wish this orchestra would travel to my part of town.	166	31	Lykgg5phVJE	Blossoms on a Moonlit River in Spring | 春江花月夜	a1b28dd08f92a8cb747737da9cbf9d80	@lensgypsy	2012-02-12T01:21:17Z	0	en	0
definitely among best tunes with the highest level of beauty in musical expression ever composed by humans! I am deeply intoxicated each time listening to this tune and this performance!	definitely among best tunes with the highest level of beauty in musical expression ever composed by humans! I am deeply intoxicated each time listening to this tune and this performance!	186	29	Lykgg5phVJE	Blossoms on a Moonlit River in Spring | 春江花月夜	143172018eea80ae720fa8b0a8a00a62	@gnehzeey	2012-01-18T20:41:55Z	0	en	0
anyone else brought here by New Practical Chinese Reader volume 2? i certainly was, the upisde to this lesson i think	anyone else brought here by New Practical Chinese Reader volume 2? i certainly was, the upisde to this lesson i think	117	18	Lykgg5phVJE	Blossoms on a Moonlit River in Spring | 春江花月夜	47e85e35abdae4ec7acadc3f442ca86c	@Mizzuru	2011-11-14T18:53:35Z	0	en	0
I really like the flute player. She is so beautiful, like an angel or fairy from heaven. That touches my heart, even though I am not a man. Beautiful!!! Thanks for posting.	I really like the flute player. She is so beautiful, like an angel or fairy from heaven. That touches my heart, even though I am not a man. Beautiful!!! Thanks for posting.	172	29	Lykgg5phVJE	Blossoms on a Moonlit River in Spring | 春江花月夜	be392e2e5055ee06c29772345b2945c6	@MissElaineTang	2011-09-21T21:25:01Z	0	en	0
simple let me forget all bad things. what a beatiful world, with such beautiful music.	simple let me forget all bad things. what a beatiful world, with such beautiful music.	86	14	Lykgg5phVJE	Blossoms on a Moonlit River in Spring | 春江花月夜	88d52ad5c5202307e44903deff38243b	@wangyoutian	2011-09-11T18:26:23Z	0	en	0
Beautiful Chinese Music!	Beautiful Chinese Music!	24	3	Lykgg5phVJE	Blossoms on a Moonlit River in Spring | 春江花月夜	e50f03b8f1421f1a6c8197c472c8300a	@TorGoGoal	2011-09-07T15:17:20Z	0	en	0
the true essence of the east in 9 minutes	the true essence of the east in 9 minutes	41	8	Lykgg5phVJE	Blossoms on a Moonlit River in Spring | 春江花月夜	f700e2c5cea7e67530344d70b5a53fb8	@woodchuckandfox	2011-09-03T11:49:45Z	0	en	0
This melody makes my heart sing - the artists are superb in their skills. Thanks for sharing.	This melody makes my heart sing - the artists are superb in their skills. Thanks for sharing.	93	16	Lykgg5phVJE	Blossoms on a Moonlit River in Spring | 春江花月夜	4429ccd436dd75589aa036d3c83c89b1	@htang888	2011-06-05T20:34:59Z	0	en	1
classical instrument from western like violin and cello is beautiful classical instrument from eastern like pipa and erhu is also beautiful but...... modern electrical instrument to make ROCK music is totally ugly	classical instrument from western like violin and cello is beautiful classical instrument from eastern like pipa and erhu is also beautiful but...... modern electrical instrument to make ROCK music is totally ugly	213	32	Lykgg5phVJE	Blossoms on a Moonlit River in Spring | 春江花月夜	f3155da1331a09170a957f9cd5bae814	@ARSilentHill07	2011-06-02T14:30:50Z	1	en	1
C EST DU BONHEUR !!!!	C EST DU BONHEUR !!!!	21	3	Lykgg5phVJE	Blossoms on a Moonlit River in Spring | 春江花月夜	2481f7102c779442e2557bb12b077e37	@raphael2432	2011-05-27T21:03:14Z	0	en	0
The charming music flows with the Yellow River across the hearts of all Chine people!	The charming music flows with the Yellow River across the hearts of all Chine people!	85	15	Lykgg5phVJE	Blossoms on a Moonlit River in Spring | 春江花月夜	22e3a766bfd0bbc4f790e2ac3d9c918b	@david1234lee	2011-05-19T00:46:33Z	0	en	0
Who's the lady blowing the flute ? She's very professional !	Who's the lady blowing the flute ? She's very professional !	60	9	Lykgg5phVJE	Blossoms on a Moonlit River in Spring | 春江花月夜	469de271e249312f20d670b79dbf4418	@paullau2010	2011-05-01T08:05:52Z	0	en	0
Wonderful chinese musical play. Who's the lady flute piper ?	Wonderful chinese musical play. Who's the lady flute piper ?	60	9	Lykgg5phVJE	Blossoms on a Moonlit River in Spring | 春江花月夜	d93d0711a74261347bd3c0eaacf74c58	@paullau2010	2011-04-19T07:31:44Z	0	en	0
@JY9318 I agreed.This is the best ever !	@JY9318 I agreed.This is the best ever !	40	8	Lykgg5phVJE	Blossoms on a Moonlit River in Spring | 春江花月夜	6572f5b4e5568e9e5f5db4e3ee5bfe85	@scychan01	2011-03-29T01:29:25Z	0	en	0
This music takes my soul to the mountains,and down the ocean then the sky again ! Just beautiful !	This music takes my soul to the mountains,and down the ocean then the sky again ! Just beautiful !	98	18	Lykgg5phVJE	Blossoms on a Moonlit River in Spring | 春江花月夜	2475f638e2f7fc1f4db2f675bd14222c	@scychan01	2011-03-29T01:25:50Z	0	en	0
@gnehzeey so it is, now at all computer, all TV, all Radios and all Handys of the World this Sound!!! Love, Peace and Freedom for all live	@gnehzeey so it is, now at all computer, all TV, all Radios and all Handys of the World this Sound!!! Love, Peace and Freedom for all live	138	27	Lykgg5phVJE	Blossoms on a Moonlit River in Spring | 春江花月夜	3dba9afd9c7b397a52fd0069fe88714e	@infolieger	2011-03-17T19:46:06Z	0	en	0
Poem (Part V): The running water bearing spring will pass away; The moon declining over the pool will sink anon. The moon declining sinks into a heavy mist; It's a long way between southern rivers and eastern seas. How many can go home by moonlight who are missed? The sinking moon sheds yearning o'er riverside trees.	Poem (Part V): The running water bearing spring will pass away; The moon declining over the pool will sink anon. The moon declining sinks into a heavy mist; It's a long way between southern rivers and eastern seas. How many can go home by moonlight who are missed? The sinking moon sheds yearning o'er riverside trees.	318	53	Lykgg5phVJE	Blossoms on a Moonlit River in Spring | 春江花月夜	478282e80e724eecf75fe913041eea9e	@fankela	2011-03-07T20:48:32Z	0	en	0
Poem (Part IV): She sees the moon, but her beloved is out of sight; She'd follow it to shine on her beloved one's face. But message-bearing swans can't fly out of moonlight, Nor can letter-sending fish leap out of their place. Last night he dreamed that falling flowers would not stay. Alas! He can't go home, although half spring has gone.	Poem (Part IV): She sees the moon, but her beloved is out of sight; She'd follow it to shine on her beloved one's face. But message-bearing swans can't fly out of moonlight, Nor can letter-sending fish leap out of their place. Last night he dreamed that falling flowers would not stay. Alas! He can't go home, although half spring has gone.	340	63	Lykgg5phVJE	Blossoms on a Moonlit River in Spring | 春江花月夜	76b95f48354fd639e78fcfb7d4b9c67a	@fankela	2011-03-07T20:47:55Z	0	en	0
Poem (Part III): Away, away is sailing a single cloud white; On Farewell Beach pine away maples green. Where is the wanderer sailing his boat tonight? Who, pining away, on the moonlit rails would learn? Alas! The moon is lingering over the tower; It should have seen the dressing table of the fair. She rolls the curtain up and light comes in her bower; She washes but can't wash away the moonbeams …	Poem (Part III): Away, away is sailing a single cloud white; On Farewell Beach pine away maples green. Where is the wanderer sailing his boat tonight? Who, pining away, on the moonlit rails would learn? Alas! The moon is lingering over the tower; It should have seen the dressing table of the fair. She rolls the curtain up and light comes in her bower; She washes but can't wash away the moonbeams …	405	72	Lykgg5phVJE	Blossoms on a Moonlit River in Spring | 春江花月夜	5e2baca786bdb267570f8e53a7d833c0	@fankela	2011-03-07T20:47:13Z	0	en	0
Poem (Part II): No dust has stained the water blending with the skies; A lonely wheel like moon shines brilliant far and wide. Who by the riverside first saw the moon arise? When did the moon first see a man by riverside? Ah, generations have come and pasted away; From year to year the moons look alike, old and new. We do not know tonight for whom she sheds her ray, But hear the river say to its …	Poem (Part II): No dust has stained the water blending with the skies; A lonely wheel like moon shines brilliant far and wide. Who by the riverside first saw the moon arise? When did the moon first see a man by riverside? Ah, generations have come and pasted away; From year to year the moons look alike, old and new. We do not know tonight for whom she sheds her ray, But hear the river say to its …	411	78	Lykgg5phVJE	Blossoms on a Moonlit River in Spring | 春江花月夜	d808c8284af29edf49d5d768fb6b6ffd	@fankela	2011-03-07T20:45:54Z	0	en	0
Poem (Part I): A Moonlit Night On The Spring River In spring the river rises as high as the sea, And with the river's rise the moon uprises bright. She follows the rolling waves for ten thousand li, And where the river flows, there overflows her light. The river winds around the fragrant islet where The blooming flowers in her light all look like snow. You cannot tell her beams from hoar frost in…	Poem (Part I): A Moonlit Night On The Spring River In spring the river rises as high as the sea, And with the river's rise the moon uprises bright. She follows the rolling waves for ten thousand li, And where the river flows, there overflows her light. The river winds around the fragrant islet where The blooming flowers in her light all look like snow. You cannot tell her beams from hoar frost in…	455	82	Lykgg5phVJE	Blossoms on a Moonlit River in Spring | 春江花月夜	cb473e11b6290a535d97049f1d92cbf9	@fankela	2011-03-07T20:44:58Z	0	en	0
wasnt that in Vienna at the MusikVerein?	wasnt that in Vienna at the MusikVerein?	40	7	Lykgg5phVJE	Blossoms on a Moonlit River in Spring | 春江花月夜	9973699bc141e9bfc8a41757e7d4d918	@Fishroads	2011-02-24T10:20:36Z	0	en	0
there are so many beautiful things in Chinese culture, including this one!	there are so many beautiful things in Chinese culture, including this one!	74	12	Lykgg5phVJE	Blossoms on a Moonlit River in Spring | 春江花月夜	25d21ec0c10272c8487d0e658b6fd990	@InfinitiesObserver	2011-02-15T11:41:52Z	0	en	0
And that's y I LOVE Chinese music -33333	And that's y I LOVE Chinese music -33333	40	6	Lykgg5phVJE	Blossoms on a Moonlit River in Spring | 春江花月夜	70b1f56101e0a3e7c4da5d5a6c94dae2	@whitesnowable	2011-02-01T06:18:37Z	0	en	0
China is Great and beauty	China is Great and beauty	25	5	Lykgg5phVJE	Blossoms on a Moonlit River in Spring | 春江花月夜	03e7b2d998d168eadc2b07ac065855a6	@vengadoRR8	2010-12-30T02:06:15Z	0	en	1
she is of china true but is = a japanese	she is of china true but is = a japanese	40	8	Lykgg5phVJE	Blossoms on a Moonlit River in Spring | 春江花月夜	6c019fde0099fd6a10b6978c93e875b1	@ggprs1	2010-12-14T19:59:19Z	0	en	0
Hey is that a pi pa ? i LOVE the sound. Beautiful xoxo thanx for posting	Hey is that a pi pa ? i LOVE the sound. Beautiful xoxo thanx for posting	72	13	Lykgg5phVJE	Blossoms on a Moonlit River in Spring | 春江花月夜	fb11f52d331d66d247f26070f62b320c	@hatchetmasta	2010-12-02T02:00:26Z	0	en	0
@taijicheng Yellow River was the cradle for all of us from whence the same people branched out to Mongolia, Yennan, the coast areas and the mountain areas and even to North America to become Eskimos and native Americans. We are all members of one big family!	@taijicheng Yellow River was the cradle for all of us from whence the same people branched out to Mongolia, Yennan, the coast areas and the mountain areas and even to North America to become Eskimos and native Americans. We are all members of one big family!	258	46	Lykgg5phVJE	Blossoms on a Moonlit River in Spring | 春江花月夜	22d7d418a7490aba4f7a824bb2a85b41	@david1234lee	2010-10-17T18:31:27Z	0	en	0
So beautiful... so poetic...	So beautiful... so poetic...	28	4	Lykgg5phVJE	Blossoms on a Moonlit River in Spring | 春江花月夜	d840a6927a93bf3fa235f441c35aa04c	@youtubister	2010-10-01T12:41:38Z	0	en	0
such rich dynamics.. fuking beautiful... these ladies can handle some business eh hahaha	such rich dynamics.. fuking beautiful... these ladies can handle some business eh hahaha	88	13	Lykgg5phVJE	Blossoms on a Moonlit River in Spring | 春江花月夜	1df0a84f3669a0cd43928293109ef121	@Miquitzli	2010-08-24T07:17:47Z	0	en	0
So beautiful it almost leaves me speechless...	So beautiful it almost leaves me speechless...	46	7	Lykgg5phVJE	Blossoms on a Moonlit River in Spring | 春江花月夜	101de1c579d2303ecbb0dcdc98bd2905	@Delkyz	2010-07-24T08:26:55Z	0	en	0
thank you for posting , love so much.	thank you for posting , love so much.	37	7	Lykgg5phVJE	Blossoms on a Moonlit River in Spring | 春江花月夜	4e12cc217e5d6b5e57aaaefc636cbb09	@meiliangwu	2010-07-10T04:38:28Z	0	en	0
I heard this song on a old kung fu movie =)	I heard this song on a old kung fu movie =)	43	8	Lykgg5phVJE	Blossoms on a Moonlit River in Spring | 春江花月夜	f1b63cafb0d1385ac194502d54b0b87e	@dragonworld2008	2010-07-07T08:01:28Z	0	en	0
Sir(s): If I may, at this Date and Time, state here that I deeply appreciate the Example of this Grand Orchestration here Displayed with Encouragement toward the Purer State of Mind for the Good Earth. Thank you. Have a Nice Day. Godspeed.	Sir(s): If I may, at this Date and Time, state here that I deeply appreciate the Example of this Grand Orchestration here Displayed with Encouragement toward the Purer State of Mind for the Good Earth. Thank you. Have a Nice Day. Godspeed.	239	39	Lykgg5phVJE	Blossoms on a Moonlit River in Spring | 春江花月夜	bd640837cd3c1f78ae435838cabb2e7b	@torstvillinger	2010-06-29T23:40:12Z	0	en	0
@zozozoki It's called pipa.	@zozozoki It's called pipa.	27	4	Lykgg5phVJE	Blossoms on a Moonlit River in Spring | 春江花月夜	75a2d6940c7daf7d2367e08d1b00ac12	@dodowang	2010-06-22T14:55:41Z	0	en	0
@scychan01 YAY westlake is beautiful , haha cwelcome to China again	@scychan01 YAY westlake is beautiful , haha cwelcome to China again	67	11	Lykgg5phVJE	Blossoms on a Moonlit River in Spring | 春江花月夜	c322aac5cb94e4cc982edd654377c31e	@curtislovelove	2010-05-25T04:13:02Z	0	en	0
Perfect ! Just perfect ! I love this,it sounds like the original one. Each time i listen to this,i think of the Westlake in China.	Perfect ! Just perfect ! I love this,it sounds like the original one. Each time i listen to this,i think of the Westlake in China.	130	22	Lykgg5phVJE	Blossoms on a Moonlit River in Spring | 春江花月夜	7a907468f9fd96f4377e80aaa193ce4c	@scychan01	2010-05-24T01:15:34Z	0	en	0
I enjoy this music very much, heard that the Chinese has about 56 Tribes Han is largest tribe, the musical performer have very lovely traditional costume, colorful, modest, full expression harmony with the music. The bamboo flute, the Pipa are usually very outstanding	I enjoy this music very much, heard that the Chinese has about 56 Tribes Han is largest tribe, the musical performer have very lovely traditional costume, colorful, modest, full expression harmony with the music. The bamboo flute, the Pipa are usually very outstanding	268	42	Lykgg5phVJE	Blossoms on a Moonlit River in Spring | 春江花月夜	a3a31c3f99e81956741e821c24c8ff40	@JanetEllenShen	2010-05-04T09:56:44Z	0	en	0
laofuzi400, I believe it was composed during the mid Tang Dynasty. Indeed, it is at least 1000 years old...... chmclh	laofuzi400, I believe it was composed during the mid Tang Dynasty. Indeed, it is at least 1000 years old...... chmclh	117	20	Lykgg5phVJE	Blossoms on a Moonlit River in Spring | 春江花月夜	ba7240ad2610bd105a0ad561ed8b3ae0	@chmclh	2010-03-11T16:04:18Z	0	en	0
Chinese music is so touching. Deep and rich culture.	Chinese music is so touching. Deep and rich culture.	52	9	Lykgg5phVJE	Blossoms on a Moonlit River in Spring | 春江花月夜	425449625aa0d87be96f1b43028633d4	@kp1957-d6z	2010-03-02T10:06:27Z	0	en	0
good words friend ! You said something from the deep of wiseness. All people are one human, God make different races, cultures to make this wonderful world so pretty. EX: I am a Moroccan American, I liked these traditions, music so wonderful. greetings !	good words friend ! You said something from the deep of wiseness. All people are one human, God make different races, cultures to make this wonderful world so pretty. EX: I am a Moroccan American, I liked these traditions, music so wonderful. greetings !	254	39	Lykgg5phVJE	Blossoms on a Moonlit River in Spring | 春江花月夜	bf769568702c41165688cd844b1c9780	@katyaziz	2010-03-01T05:56:13Z	0	en	0
It's the Golden Hall inside the Vienna concert hall.	It's the Golden Hall inside the Vienna concert hall.	52	9	Lykgg5phVJE	Blossoms on a Moonlit River in Spring | 春江花月夜	93ce1bd7699fda54d9514cb7b957b118	@lunlunqq	2010-01-17T19:31:11Z	0	en	0
@mingh83: the concert took place at the Großer Musikvereinssaal The Golden Hall in Austria which is a SHRINE for the top musicians all over the world - which are having equal status as the Music Hall of our National Centre for the Performing Arts, Beijing!	@mingh83: the concert took place at the Großer Musikvereinssaal The Golden Hall in Austria which is a SHRINE for the top musicians all over the world - which are having equal status as the Music Hall of our National Centre for the Performing Arts, Beijing!	256	45	Lykgg5phVJE	Blossoms on a Moonlit River in Spring | 春江花月夜	a0df3092aefd4e3a756cecb727087fec	@zeeyeezone	2010-01-02T11:28:57Z	0	en	0
Beautiful music, terrific performance and pretty traditional dresses! Much appreciated for sharing this with all!!!!	Beautiful music, terrific performance and pretty traditional dresses! Much appreciated for sharing this with all!!!!	116	15	Lykgg5phVJE	Blossoms on a Moonlit River in Spring | 春江花月夜	b5a9819f7ebaeb61ad50d7e9db6b28d3	@aussinma	2009-12-28T11:20:34Z	0	en	0
Best music all over the world	Best music all over the world	29	6	Lykgg5phVJE	Blossoms on a Moonlit River in Spring | 春江花月夜	8fe0f73e107de8db08e0a87c8c9a7e07	@sysonweb	2009-12-19T04:11:38Z	0	en	0
This is a SUPREME presentation of the Chinese classical ensemble. The emotive essence and poetic power are engrossed in this music. The elegant tunes are evocative and profoundly beautiful. It is the champion of the Chinese romantic spirit !!!	This is a SUPREME presentation of the Chinese classical ensemble. The emotive essence and poetic power are engrossed in this music. The elegant tunes are evocative and profoundly beautiful. It is the champion of the Chinese romantic spirit !!!	243	37	Lykgg5phVJE	Blossoms on a Moonlit River in Spring | 春江花月夜	e7bbad9d4678246180fc510dca886503	@RHM741	2009-11-19T10:30:58Z	0	en	0
My, my, this title is really hard to translate. I would venture: "Spring Blossoms along moon-lit River" because "night" is implied in "moon-lit" so that we can avoid redundancy by dropping "night". Beautiful music wonderfully played! Do you agree?	My, my, this title is really hard to translate. I would venture: "Spring Blossoms along moon-lit River" because "night" is implied in "moon-lit" so that we can avoid redundancy by dropping "night". Beautiful music wonderfully played! Do you agree?	247	40	Lykgg5phVJE	Blossoms on a Moonlit River in Spring | 春江花月夜	9e4914cbdc6120afe6b5db8e86402f9c	@david1234lee	2009-11-17T02:48:39Z	0	en	0
This is a SUPREME presentation of the Chinese classical ensemble. The emotive essence and poetic power are engrossed in this music. The elegant tunes are evocative and hauntingly beautiful. It is the champion of the Chinese romantic spirit !!!	This is a SUPREME presentation of the Chinese classical ensemble. The emotive essence and poetic power are engrossed in this music. The elegant tunes are evocative and hauntingly beautiful. It is the champion of the Chinese romantic spirit !!!	243	37	Lykgg5phVJE	Blossoms on a Moonlit River in Spring | 春江花月夜	aa3f9aa6c7da67223af4549074aad5d5	@RHM741	2009-11-14T04:46:41Z	0	en	0
I like your comments. The antagonist is possibly wearing a foreign garb begging for acceptance. The Manchu is one of the Chinese major races. Manchus clothing is rightfully defined as Chinese. We have to forgive some peoples ignorance or arrogance. After all, this is an art performance. No need for petty political / feudalistic comments. There is no laws saying Han women have to wear one types of…	I like your comments. The antagonist is possibly wearing a foreign garb begging for acceptance. The Manchu is one of the Chinese major races. Manchus clothing is rightfully defined as Chinese. We have to forgive some peoples ignorance or arrogance. After all, this is an art performance. No need for petty political / feudalistic comments. There is no laws saying Han women have to wear one types of…	415	67	Lykgg5phVJE	Blossoms on a Moonlit River in Spring | 春江花月夜	474fdc074527c193cd21553c7bb02a9a	@RHM741	2009-11-14T04:03:27Z	0	en	0
haha I allready had this one on my computer =D	haha I allready had this one on my computer =D	46	8	Lykgg5phVJE	Blossoms on a Moonlit River in Spring | 春江花月夜	c119af6dd899b400983fc7da776ba65f	@TimBirkenholz	2009-11-01T15:00:17Z	0	en	0
nah, the reason why China is a great country is because that she can absorb elements of other cultures and develop something very unique. Pipa, Erhu, and many other Chinese instruments all came from central Asia. But now they are part of Chinese instruments. And Manchurian people are also Chinese people, right?	nah, the reason why China is a great country is because that she can absorb elements of other cultures and develop something very unique. Pipa, Erhu, and many other Chinese instruments all came from central Asia. But now they are part of Chinese instruments. And Manchurian people are also Chinese people, right?	312	51	Lykgg5phVJE	Blossoms on a Moonlit River in Spring | 春江花月夜	b645f893ee6f47a58f5725db262e7b6c	@ppw8626	2009-09-13T08:27:42Z	0	en	0
wow they are mainly women... nice music...	wow they are mainly women... nice music...	42	7	Lykgg5phVJE	Blossoms on a Moonlit River in Spring | 春江花月夜	34acfadce8805e161dd0754bea7bbb22	@aomjames	2009-08-21T22:31:08Z	0	en	0
Where is this concert hall located at? Looks European. I really liked the Pipa lady's technique that's usually different than what I hear in Chujianghuayueye. Thanks for uploading this!	Where is this concert hall located at? Looks European. I really liked the Pipa lady's technique that's usually different than what I hear in Chujianghuayueye. Thanks for uploading this!	185	27	Lykgg5phVJE	Blossoms on a Moonlit River in Spring | 春江花月夜	4dcac75dbd826a772adb25d60457fec1	@mingh83	2009-08-08T15:30:31Z	0	en	0
masterpiece peace in my heart	masterpiece peace in my heart	29	5	Lykgg5phVJE	Blossoms on a Moonlit River in Spring | 春江花月夜	61bb78273e60de2247bd175fd8ce4eff	@kevinclx19890517	2009-07-24T19:11:37Z	0	en	0
You are right. I noticed that when the music reached @59, it jumped to . Don't know why... As for the cloth, I strongly believe they should wear uniform. It will looked much better.	You are right. I noticed that when the music reached @59, it jumped to 1:00. Don't know why... As for the cloth, I strongly believe they should wear uniform. It will looked much better.	181	31	Lykgg5phVJE	Blossoms on a Moonlit River in Spring | 春江花月夜	49e191197578817d4aa41dce54ccb42a	@Graceycwong	2009-07-18T21:31:52Z	0	en	0
very nice! im diggin the traditional chinese instruments.	very nice! im diggin the traditional chinese instruments.	57	8	Lykgg5phVJE	Blossoms on a Moonlit River in Spring | 春江花月夜	25717e10a7c4b5ba532eb5e68fb9d9ac	@RaginCajunAsian	2009-07-06T05:15:14Z	0	en	0
horrible outfits IMO, since it's not Chinese, it's Manchurian. They should wear Hanfu, actual Chinese period clothing.	horrible outfits IMO, since it's not Chinese, it's Manchurian. They should wear Hanfu, actual Chinese period clothing.	118	17	Lykgg5phVJE	Blossoms on a Moonlit River in Spring | 春江花月夜	73ccda6034493d9d953d835cdfbddb29	@gariadara	2009-07-03T08:29:24Z	0	en	0
one of my all time favorites	one of my all time favorites	28	6	Lykgg5phVJE	Blossoms on a Moonlit River in Spring | 春江花月夜	e031ae6b5947c4a9824905430d5714d1	@slinkyjett	2009-06-27T13:39:09Z	0	en	0
This is a great piece to listen to. I love the pipa and erhu, because they compliment one another.......Great Job.	This is a great piece to listen to. I love the pipa and erhu, because they compliment one another.......Great Job.	114	19	Lykgg5phVJE	Blossoms on a Moonlit River in Spring | 春江花月夜	f9323c8f731e3ad3d97bb3a67f09069e	@Solo761218	2009-06-21T18:24:23Z	0	en	0
Tears flow with joy!	Tears flow with joy!	20	4	Lykgg5phVJE	Blossoms on a Moonlit River in Spring | 春江花月夜	00699337361592b38c203b2cd42ee3e0	@david1234lee	2009-06-03T01:50:01Z	0	en	0
with eyes open (because i wanna see what the hell is going on), i listened with my ears (doubt you can hear without ears). my tears flow only when i see people dying of hunger and when i got something in my eyes......	with eyes open (because i wanna see what the hell is going on), i listened with my ears (doubt you can hear without ears). my tears flow only when i see people dying of hunger and when i got something in my eyes......	217	39	Lykgg5phVJE	Blossoms on a Moonlit River in Spring | 春江花月夜	71c091517c416e96c42ee6567a50e274	@thereddoors	2009-05-21T06:13:34Z	0	en	0
it's all good here	it's all good here	18	4	Lykgg5phVJE	Blossoms on a Moonlit River in Spring | 春江花月夜	4bcac92f8b647f7a2c000ff89f7404d2	@spurcheck	2009-05-14T19:08:01Z	0	en	0
I didn't know about music at all, but I think there is something wrong at as the expression of them look like a little bit strange when the ku chen sound start a little bit early. Sorry if I am wrong. :-)	I didn't know about music at all, but I think there is something wrong at 1:03 as the expression of them look like a little bit strange when the ku chen sound start a little bit early. Sorry if I am wrong. :-)	204	36	Lykgg5phVJE	Blossoms on a Moonlit River in Spring | 春江花月夜	5bfc08fd959d0e68a4e7375086b2a8eb	@thegreatMSG	2009-04-24T02:29:39Z	0	en	0
chinese music is the best	chinese music is the best	25	5	Lykgg5phVJE	Blossoms on a Moonlit River in Spring | 春江花月夜	ab3330ed8f7b35087f48034c773b8fd9	@Hsiaomu720	2009-04-23T03:21:50Z	0	en	0
Imagine; spring night, you are a person in Riverside, it is immense and very bright round moon, the breeze blowing your hair, you think? True Romance	Imagine; spring night, you are a person in Riverside, it is immense and very bright round moon, the breeze blowing your hair, you think? True Romance	149	25	Lykgg5phVJE	Blossoms on a Moonlit River in Spring | 春江花月夜	7048ac291dbe048718813af3326c6618	@bimuyux	2009-02-12T03:10:30Z	0	en	0
What's her name?	What's her name? 03:40	16	3	Lykgg5phVJE	Blossoms on a Moonlit River in Spring | 春江花月夜	78885d9b9ebdefb5a6d2917843f433ab	@U38066	2009-01-24T18:19:09Z	0	en	0
Beautiful music,thank you.	Beautiful music,thank you.	26	4	Lykgg5phVJE	Blossoms on a Moonlit River in Spring | 春江花月夜	6a59fe791d91c8c2f00232b1e32e0aa5	@binhtjhuynh	2009-01-24T14:52:05Z	0	en	0
sorry , but there maybe no sadness in this piece of music it describes the scenery of a river in the spring night~~	sorry , but there maybe no sadness in this piece of music it describes the scenery of a river in the spring night~~	115	21	Lykgg5phVJE	Blossoms on a Moonlit River in Spring | 春江花月夜	79628e78f0ab813c420d458a6e7df6c9	@ray911abc	2009-01-24T11:19:56Z	0	en	0
One of my all time favourite!!! So beautifully done!!! Thank you!	One of my all time favourite!!! So beautifully done!!! Thank you!	65	11	Lykgg5phVJE	Blossoms on a Moonlit River in Spring | 春江花月夜	45eb8d04e763cf8acf6f156df19a8f85	@humourlayers	2008-12-28T07:02:02Z	0	en	0
Moonlight in the Spring River, one of the classics in Chinese music.	Moonlight in the Spring River, one of the classics in Chinese music.	68	12	Lykgg5phVJE	Blossoms on a Moonlit River in Spring | 春江花月夜	5608dc94069c998537c43b50946e8258	@shuo522	2008-12-10T23:10:58Z	0	en	0
please as it calls the orchestra thanks	please as it calls the orchestra thanks	39	7	Lykgg5phVJE	Blossoms on a Moonlit River in Spring | 春江花月夜	b77442fd030a43898f0733778fffaf88	@luclin2	2008-11-07T05:09:55Z	0	en	0
Thank you Pan from Singapore to share such a beautiful music performance with us. The music is just beautiful. Pardon me to say that the ladies and gentlemen are very attractive and good looking too. This will give extra bonus to the audience.	Thank you Pan from Singapore to share such a beautiful music performance with us. The music is just beautiful. Pardon me to say that the ladies and gentlemen are very attractive and good looking too. This will give extra bonus to the audience.	243	42	Lykgg5phVJE	Blossoms on a Moonlit River in Spring | 春江花月夜	2a3a3750f04d3f6f4bb8e116c9d36218	@bobchewaing	2008-10-29T02:18:13Z	0	en	0
to all you ppl Chinese or not. This theme is the "anthem" of antique china. the most typical of all classic Chinese music.	to all you ppl Chinese or not. This theme is the "anthem" of antique china. the most typical of all classic Chinese music.	122	23	Lykgg5phVJE	Blossoms on a Moonlit River in Spring | 春江花月夜	9ac303ca6a18fc323b2c450b635cdece	@moxinghbian	2008-08-23T02:04:32Z	0	en	0
I also recorded this piece arranged by Yang Jing and Wolfgang Sieber, organ, in a Church of Lucerne, Switzerland. I like this piece very much. Go to "Yang Jing & Wolfgang Sieber: Pipa and Pipes"	I also recorded this piece arranged by Yang Jing and Wolfgang Sieber, organ, in a Church of Lucerne, Switzerland. I like this piece very much. Go to "Yang Jing & Wolfgang Sieber: Pipa and Pipes"	194	31	Lykgg5phVJE	Blossoms on a Moonlit River in Spring | 春江花月夜	92c0a14c84a0f3d80f772551ba97a8c8	@dingoandfox	2008-07-02T11:51:02Z	0	en	0
I also recorded this piece with Yang Jing and Wolfgang Sieber, organ. I like it very much! Go to "Yang Jing & Wolfgang Sieber: Pipa and Pipes"	I also recorded this piece with Yang Jing and Wolfgang Sieber, organ. I like it very much! Go to "Yang Jing & Wolfgang Sieber: Pipa and Pipes"	142	24	Lykgg5phVJE	Blossoms on a Moonlit River in Spring | 春江花月夜	5893fcbb10ee7ff331656a098296a8ff	@dingoandfox	2008-07-02T11:02:51Z	0	en	0
they are laruan	they are laruan	15	3	Lykgg5phVJE	Blossoms on a Moonlit River in Spring | 春江花月夜	5ffe67ea6ba8e65fb53c8217f9e7e588	@isFuzzy	2008-06-05T12:08:55Z	0	en	0
Thank you thank you! one of my all time favourite classical music! Beautiful n so serene!	Thank you thank you! one of my all time favourite classical music! Beautiful n so serene!	89	15	Lykgg5phVJE	Blossoms on a Moonlit River in Spring | 春江花月夜	c20f48d92ccafe0965ab814c7f4d2439	@zeeyeezone	2008-05-11T17:22:42Z	0	en	0
The lyric was written with a different piece of music. I love it also.	The lyric was written with a different piece of music. I love it also.	70	12	Lykgg5phVJE	Blossoms on a Moonlit River in Spring | 春江花月夜	5afa49e03ff3767a2be0c128955d454a	@cheungleo	2008-05-09T13:21:58Z	0	en	0
what are those cello looking instruments called?	what are those cello looking instruments called?	48	7	Lykgg5phVJE	Blossoms on a Moonlit River in Spring | 春江花月夜	e4fe7d565f594bc2a61bba0c3adb4418	@PianoScience	2008-05-07T02:29:32Z	0	en	0
I don't find any words to explain how beautiful this music is for me.	I don't find any words to explain how beautiful this music is for me.	69	13	Lykgg5phVJE	Blossoms on a Moonlit River in Spring | 春江花月夜	126244f090a667c6152ece582fbf93b5	@K1Bear	2008-04-18T01:41:03Z	0	en	0
wow... I've just started to play the guzheng edition...	wow... I've just started to play the guzheng edition...	55	9	Lykgg5phVJE	Blossoms on a Moonlit River in Spring | 春江花月夜	c9e3963001b6f291451c0973f97097e0	@snowholly	2008-02-17T05:53:13Z	0	en	0
This uploaded music is beyond my expectation. Other than a superb piece of music, it's historical, cultural, and spectacular. I wonder what is the name of this DVD if anyone knows. Thank you to you hacona.	This uploaded music is beyond my expectation. Other than a superb piece of music, it's historical, cultural, and spectacular. I wonder what is the name of this DVD if anyone knows. Thank you to you hacona.	205	34	Lykgg5phVJE	Blossoms on a Moonlit River in Spring | 春江花月夜	96dae431b0a026059aed2727dae9b935	@optionmad	2008-02-14T04:22:52Z	0	en	0
look at the right hand side for the details?	look at the right hand side for the details?	44	9	Lykgg5phVJE	Blossoms on a Moonlit River in Spring | 春江花月夜	df230744df0d9a3f93e4f12c0e93186f	@hacona	2008-02-11T09:20:25Z	0	en	0
very very moving! enchanting to say the least	very very moving! enchanting to say the least	45	8	Lykgg5phVJE	Blossoms on a Moonlit River in Spring | 春江花月夜	3dd0ca2b8ed96d689b425887a4165610	@milkycooler	2008-01-08T00:51:21Z	0	en	0
the xiao solo is beautiful	the xiao solo is beautiful	26	5	Lykgg5phVJE	Blossoms on a Moonlit River in Spring | 春江花月夜	7a597fa2d31ffff1f8ba0cbaf14497fd	@fobbyrice	2007-12-26T03:05:14Z	0	en	0
Excellant music. I love this orchestra	Excellant music. I love this orchestra	38	5	Lykgg5phVJE	Blossoms on a Moonlit River in Spring | 春江花月夜	ef72de930bda7d6ce2db92bf7ecb0aee	@allanyauhf	2007-12-18T13:43:19Z	0	en	0
sorry nope, if u are asking me.	sorry nope, if u are asking me.	31	6	Lykgg5phVJE	Blossoms on a Moonlit River in Spring | 春江花月夜	82c1210e8da8e80ff67410e816109b27	@hacona	2007-12-09T09:16:11Z	0	en	0
basically it's about a scenery during spring, under the moonlight on a river bank.	basically it's about a scenery during spring, under the moonlight on a river bank.	82	12	Lykgg5phVJE	Blossoms on a Moonlit River in Spring | 春江花月夜	d246986e7d93911b3a284793ef02ef0f	@hacona	2007-10-22T10:21:44Z	0	en	1
no u are mistaken. They intentionally made this song played by all the females. There's another item played by the men. The other songs for this concert are all played by both male and female. nothnig to worry about.	no u are mistaken. They intentionally made this song played by all the females. There's another item played by the men. The other songs for this concert are all played by both male and female. nothnig to worry about.	216	38	Lykgg5phVJE	Blossoms on a Moonlit River in Spring | 春江花月夜	59a74357a55dc6681052aba60e5e5298	@hacona	2007-10-22T10:19:50Z	0	en	0
Is there anyone who is not from China understand what the music tells?	Is there anyone who is not from China understand what the music tells?	70	13	Lykgg5phVJE	Blossoms on a Moonlit River in Spring | 春江花月夜	2c3b22d896b38bc12c42daad57f9c380	@dabieshan	2007-10-22T02:42:33Z	0	en	0
really good performance. all the artists are female, which is not a very healthy sign for the future of Chinese music...	really good performance. all the artists are female, which is not a very healthy sign for the future of Chinese music...	120	20	Lykgg5phVJE	Blossoms on a Moonlit River in Spring | 春江花月夜	510521c9b9bcaa90ccaa46d705a9d0a5	@quicker1234567	2007-10-17T21:55:12Z	0	en	0
Absolutely fantastic. Just (gently) sweeps you away.	Absolutely fantastic. Just (gently) sweeps you away.	52	7	Lykgg5phVJE	Blossoms on a Moonlit River in Spring | 春江花月夜	fc96b4044568c8f5deece770ae345bee	@youtubister	2007-08-28T16:51:00Z	0	en	1
I love the lady who plays the Xiao. She is absolutely elegant and beautiful both the person and her playing. Does any one know her name? Is she married? I would do anything for her!	I love the lady who plays the Xiao. She is absolutely elegant and beautiful both the person and her playing. Does any one know her name? Is she married? I would do anything for her!	181	33	Lykgg5phVJE	Blossoms on a Moonlit River in Spring | 春江花月夜	dbb72e87223e0708db04aae39de02591	@laofuzi51	2007-06-04T23:12:39Z	0	en	0
welcome to an other world.. China, i like it!!	welcome to an other world.. China, i like it!!	46	8	Lykgg5phVJE	Blossoms on a Moonlit River in Spring | 春江花月夜	5b2c997581605f375a1ab582e662f4b2	@Tropper18	2007-06-04T02:41:33Z	0	en	0
Beautifully played....highly evocative, can sense the moon, the spring nite and the placid river.	Beautifully played....highly evocative, can sense the moon, the spring nite and the placid river.	97	15	Lykgg5phVJE	Blossoms on a Moonlit River in Spring | 春江花月夜	1d6dabafb367caf78c6c0bf30551b7cb	@OperafanSingapore	2007-02-26T05:13:42Z	0	en	0
I think is...New Year Concert 1997.	I think is...New Year Concert 1997.	35	6	Lykgg5phVJE	Blossoms on a Moonlit River in Spring | 春江花月夜	692ee9fb257b6f7297372811285be46f	@hacona	2006-12-12T02:42:05Z	0	en	0
nope that song wasn't part of the concert...	nope that song wasn't part of the concert...	44	8	Lykgg5phVJE	Blossoms on a Moonlit River in Spring | 春江花月夜	ec9f6bc397d6a620330846180c5c93e1	@hacona	2006-12-12T02:41:35Z	0	en	0
what is the title of the cd?	what is the title of the cd?	28	7	Lykgg5phVJE	Blossoms on a Moonlit River in Spring | 春江花月夜	4ac027ce2a80297effb0e36d2f587e3d	@simon18i	2006-12-05T17:56:57Z	0	en	0
I saw the vcd at Bras Basah complex, Singapore.	I saw the vcd at Bras Basah complex, Singapore.	47	8	Lykgg5phVJE	Blossoms on a Moonlit River in Spring | 春江花月夜	aa19cd73d12c66b9af3d46aa5d140222	@hacona	2006-10-19T16:06:23Z	1	en	0
great videos and beautiful music of all. you made a clear introduction to promote Chinese traditional music, it's awesome!	great videos and beautiful music of all. you made a clear introduction to promote Chinese traditional music, it's awesome!❤	122	18	PLa4aXxispc	Chinese classical music for zither guzheng solo 漢宮秋月by Liu Fang 劉芳	0e2c45358a51b5834d341d317b120a2e	@lenablack9173	2016-08-07T15:03:19Z	0	en	0
Why is this cut off before the end? Would you mind reloading it so that we can appreciate the entire piece of music? Thank you very much for sharing!	Why is this cut off before the end? Would you mind reloading it so that we can appreciate the entire piece of music? Thank you very much for sharing!	150	29	PLa4aXxispc	Chinese classical music for zither guzheng solo 漢宮秋月by Liu Fang 劉芳	7001e7069d4babc6f300776ace40f73f	@BlessAllKC	2015-03-19T09:44:26Z	0	en	1
I don't know why this sound makes me feeling so good. Where is my tea?	I don't know why this sound makes me feeling so good. Where is my tea?	70	14	PLa4aXxispc	Chinese classical music for zither guzheng solo 漢宮秋月by Liu Fang 劉芳	6a6dff3b16ee555f4ccfc6a18f13c696	@EldiasMahdiSastra	2013-01-24T01:56:34Z	0	en	0
Ain't this song in Civ5?	Ain't this song in Civ5?	24	5	PLa4aXxispc	Chinese classical music for zither guzheng solo 漢宮秋月by Liu Fang 劉芳	182834339ad7d6806c4c74da3dbfc756	@Nirvashvos	2012-08-31T20:44:40Z	0	en	0
@twipurplequeen(...) this is one of the instruments the Track Team used to create this asian kind of music at avatar :)	@twipurplequeen(...) this is one of the instruments the Track Team used to create this asian kind of music at avatar :)	119	20	PLa4aXxispc	Chinese classical music for zither guzheng solo 漢宮秋月by Liu Fang 劉芳	2bce4a718f2e780a13e092aa4ab2f3b3	@archivbox1	2011-10-12T20:28:08Z	0	en	0
Such a rich instrument!	Such a rich instrument!	23	3	PLa4aXxispc	Chinese classical music for zither guzheng solo 漢宮秋月by Liu Fang 劉芳	b9827cd80959a77b92f80b29ee4bfd52	@Sydwayman	2011-04-05T01:52:28Z	0	en	0
if I see this video I must always cry	if I see this video I must always cry	37	7	PLa4aXxispc	Chinese classical music for zither guzheng solo 漢宮秋月by Liu Fang 劉芳	a0de7bcfbcbc3cf83901195de324ae5f	@98solala	2011-02-21T16:51:03Z	0	en	0
This reminds me of avatar the last airbender :)	This reminds me of avatar the last airbender :)	47	8	PLa4aXxispc	Chinese classical music for zither guzheng solo 漢宮秋月by Liu Fang 劉芳	e02306ab392bf806e0b382ec5a0a680b	@twiPuRpLeQuEeN18	2010-11-30T00:53:26Z	0	en	0
2nd that! Awesome music.	2nd that! Awesome music.	24	4	PLa4aXxispc	Chinese classical music for zither guzheng solo 漢宮秋月by Liu Fang 劉芳	ba5e3598eeed9be4b49ce62f69eee117	@dzparadox	2009-07-26T22:01:33Z	0	en	0
very beautiful music. cheers from the USA. I love this music!!!	very beautiful music. cheers from the USA. I love this music!!!	63	10	PLa4aXxispc	Chinese classical music for zither guzheng solo 漢宮秋月by Liu Fang 劉芳	1503802b5337e98a83daac44209aa52d	@vutEwa	2008-06-02T07:18:12Z	0	en	0
this woman can play any chinese trad instrument ? hehe	this woman can play any chinese trad instrument ? hehe	54	9	PLa4aXxispc	Chinese classical music for zither guzheng solo 漢宮秋月by Liu Fang 劉芳	b261115390713e418cd6c7c8d274f06a	@stebite	2008-04-09T23:15:30Z	0	en	0
interesting I have no framework in which to consider this music, but she is obviously a skilled and dedicated musician..	interesting I have no framework in which to consider this music, but she is obviously a skilled and dedicated musician..	120	18	PLa4aXxispc	Chinese classical music for zither guzheng solo 漢宮秋月by Liu Fang 劉芳	bc0475b3ecb1255a3042e30d0fffc90b	@646879	2008-01-29T14:11:38Z	0	en	0
@Pat123123123 HEY u SUCKER!!!! i suppossed that u nvr tried it n i'm here to tell u that tis piece of music is from HIGH GRADE! She would be the best "FINGER PICKERS" u ever seen in ur LIFE! If u see any others can play better than her TELL ME!!! ( Stuff in guitar at grade 1-2 is NOTHING compared to tis!)	@Pat123123123 HEY u SUCKER!!!! i suppossed that u nvr tried it n i'm here to tell u that tis piece of music is from HIGH GRADE! She would be the best "FINGER PICKERS" u ever seen in ur LIFE! If u see any others can play better than her TELL ME!!! ( Stuff in guitar at grade 1-2 is NOTHING compared to tis!)	306	54	GDiVQXz3bX0	Chinese traditional music - 霸王卸甲, Liu Fang pipa solo 劉芳	f5dfb567a59034d7d5177fe464825b96	@TheAlmerick	2011-10-05T13:03:42Z	0	en	0
through the bamboo and the and the flames by pipaforce	through the bamboo and the and the flames by pipaforce	54	10	GDiVQXz3bX0	Chinese traditional music - 霸王卸甲, Liu Fang pipa solo 劉芳	8804f60faafe35de4414abf883566eca	@drewcox010101	2011-06-19T17:34:14Z	0	en	1
Master of Pipa...	Master of Pipa...	17	3	GDiVQXz3bX0	Chinese traditional music - 霸王卸甲, Liu Fang pipa solo 劉芳	a2999665336a2ba877d8df97c6d0a2ba	@470666470	2011-02-24T14:34:41Z	0	en	1
watch high quality song of Liu Fang here v=KLmXOEUXsCw	watch high quality song of Liu Fang here v=KLmXOEUXsCw	54	9	GDiVQXz3bX0	Chinese traditional music - 霸王卸甲, Liu Fang pipa solo 劉芳	b9504d0bba4b67bb24149889a1903d8e	@GrainOfSaltFishing	2010-11-07T20:48:13Z	0	en	0
she realy loves her pipa! i love it too!	she realy loves her pipa! i love it too!	40	8	GDiVQXz3bX0	Chinese traditional music - 霸王卸甲, Liu Fang pipa solo 劉芳	8cfd6d3db50f063f0d444a42cccac861	@2010Astarte	2010-10-13T18:01:36Z	0	en	0
Wonderfullllllll... Excellent N1 * * * * * ...Just totally amazing	Wonderfullllllll... Excellent N1 * * * * * ...Just totally amazing	66	5	GDiVQXz3bX0	Chinese traditional music - 霸王卸甲, Liu Fang pipa solo 劉芳	e35c2aaf4c788a826b5d66f87f97a79d	@Tokykynay	2010-02-06T23:54:34Z	0	en	1
omg her tremolo is very good	omg her tremolo is very good	28	6	GDiVQXz3bX0	Chinese traditional music - 霸王卸甲, Liu Fang pipa solo 劉芳	885601120f894a5363d727f7acc30e5e	@Squidward93	2009-08-05T11:25:40Z	0	en	0
I can onldy finde one word about this, Awesome.	I can onldy finde one word about this, Awesome.	47	8	GDiVQXz3bX0	Chinese traditional music - 霸王卸甲, Liu Fang pipa solo 劉芳	85c4b0f3e0051257336f9ac1944cfff8	@Morsil123	2009-08-04T22:22:53Z	0	en	0
Well done! I dotn know why people are saying its ahrder than guitar tho.... All she is doing is finger picking really fast.. her fret hand is playing stuff as easy as grade 1 level guitar.. Seriously watch her fret hand its liek 1 - 2 notes at a time for like 10 seconds. Really well done tho!! one of the best "FINGER PICKERS" ive seen this week.	Well done! I dotn know why people are saying its ahrder than guitar tho.... All she is doing is finger picking really fast.. her fret hand is playing stuff as easy as grade 1 level guitar.. Seriously watch her fret hand its liek 1 - 2 notes at a time for like 10 seconds. Really well done tho!! one of the best "FINGER PICKERS" ive seen this week.	347	62	GDiVQXz3bX0	Chinese traditional music - 霸王卸甲, Liu Fang pipa solo 劉芳	6cfc0f4521055935d23c894d2e524655	@Pat123123123	2008-11-04T22:25:20Z	0	en	1
Thank you very much. Dramatic-Beautiful !	Thank you very much. Dramatic-Beautiful !	41	6	GDiVQXz3bX0	Chinese traditional music - 霸王卸甲, Liu Fang pipa solo 劉芳	0ae8a122351574f3645a9dcfba2171e3	@nmyty7	2008-09-20T13:06:19Z	0	en	0
they should make pipa hero, and put this piece in there.	they should make pipa hero, and put this piece in there.	56	11	GDiVQXz3bX0	Chinese traditional music - 霸王卸甲, Liu Fang pipa solo 劉芳	122a204880b7394438eaa3d749e3eb10	@xingfenzhen	2008-07-23T02:39:00Z	0	en	0
this stuff is much harder to play than guitar!! awesome!	this stuff is much harder to play than guitar!! awesome!	56	10	GDiVQXz3bX0	Chinese traditional music - 霸王卸甲, Liu Fang pipa solo 劉芳	ddd9aa9557ed38e64661f8b02a12afd5	@georgeadbb	2008-02-06T04:05:41Z	0	en	1
the instrument Pi Pa has over 2000 years of history. This song is, roughly translated as "The conqueror doffs his armor". That refers to Xiang Yu (232bc - 202bc, Overlord of West Chu) whom was defeated by Liu Bang in the battle of Gaixia, realizing his end is coming and he watched his concubine(a 16 yr old beauty)commite suicide. (the last part of the song)	the instrument Pi Pa has over 2000 years of history. This song is, roughly translated as "The conqueror doffs his armor". That refers to Xiang Yu (232bc - 202bc, Overlord of West Chu) whom was defeated by Liu Bang in the battle of Gaixia, realizing his end is coming and he watched his concubine(a 16 yr old beauty)commite suicide. (the last part of the song)	359	67	GDiVQXz3bX0	Chinese traditional music - 霸王卸甲, Liu Fang pipa solo 劉芳	b83600241b93d9c9eaf8ae7fb33ba412	@HLTVpro	2007-11-02T11:30:33Z	0	en	2
If you practice internal martial arts with that music you might make an accidental Adoocken!	If you practice internal martial arts with that music you might make an accidental Adoocken!	92	15	GDiVQXz3bX0	Chinese traditional music - 霸王卸甲, Liu Fang pipa solo 劉芳	99cdd0953671ebf7dc460ead2dcf954e	@asslaslades	2007-08-15T21:53:02Z	0	en	0
Who else always sings along to the theme song at the end? I've been listening to this on my playlist for 8 years. . . . that's a lot of theme song!	Who else always sings along to the theme song at the end? I've been listening to this on my playlist for 8 years. . . . that's a lot of theme song!	147	27	KxVbdGPAfjE	Beautiful China and traditional music	596358de3d2231ce7eb349661c6cff28	@Bobbysoxxx	2018-08-21T12:31:23Z	0	en	0
i love this music	i love this music	17	3	KxVbdGPAfjE	Beautiful China and traditional music	4e8c58c2ddeb8456e07869b379fdffdd	@zhihongtam3399	2015-05-08T22:07:29Z	0	en	1
Beautiful sounds and scenery.	Beautiful sounds and scenery.	29	4	KxVbdGPAfjE	Beautiful China and traditional music	996d1425e63fb6df2490f0786eab3e26	@MrEdward268	2015-03-27T14:55:49Z	0	en	1
My friend Adrian Gromaz Palomino I hope that you like the sounds and scenery	My friend Adrian Gromaz Palomino I hope that you like the sounds and scenery	77	13	KxVbdGPAfjE	Beautiful China and traditional music	96abda51d082460e6d62a27dcac3c21c	@بریاليجنګیالي	2014-12-22T21:53:47Z	0	en	3
What is the name of the song?	What is the name of the song?	29	7	KxVbdGPAfjE	Beautiful China and traditional music	87cea3c4125dd3f9ab1d79838f69241a	@pascoett	2014-11-10T17:00:36Z	0	en	0
Thank you for writing this comment. I don't know if what you're saying is true or not, but it did open my eyes.	Thank you for writing this comment. I don't know if what you're saying is true or not, but it did open my eyes.	111	23	KxVbdGPAfjE	Beautiful China and traditional music	8a862149c0309d644a307658e04e1df8	@pastelisland	2013-08-30T06:47:57Z	0	en	0
this is not chinese FLUTE, bastard	this is not chinese FLUTE, bastard	34	6	KxVbdGPAfjE	Beautiful China and traditional music	91a2503c7af657ed896a6e464bd0ae16	@12oad	2013-06-06T19:59:22Z	0	en	0
Let Love and Unity Reign. Ignore what the media say. I know I do. The media are that kind of thing that you line a cat tray with. Rise above that sewage level.	Let Love and Unity Reign. Ignore what the media say. I know I do. The media are that kind of thing that you line a cat tray with. Rise above that sewage level.	159	30	KxVbdGPAfjE	Beautiful China and traditional music	e85794f0d6d43936fc650d0761bbd24d	@linx003	2013-03-31T21:42:06Z	0	en	0
And we've got the West, the Mongols and a heck lots of other nations namely Jpan to thank for that. Oh and not to mention ourselves (the Chinese) as well :P	And we've got the West, the Mongols and a heck lots of other nations namely Jpan to thank for that. Oh and not to mention ourselves (the Chinese) as well :P	156	30	KxVbdGPAfjE	Beautiful China and traditional music	40812bf8feb7367ebb425b5dc6b4c892	@chunqy	2013-01-29T03:02:56Z	0	en	0
OMG! Guy below me, that was the best thing I've heard in my life! And I don't even know if it's good or bad xD	OMG! Guy below me, that was the best thing I've heard in my life! And I don't even know if it's good or bad xD	110	24	KxVbdGPAfjE	Beautiful China and traditional music	b7eda2c24b8fb6ea451c8d5cacd231ed	@BlazingWind200	2012-09-04T04:53:31Z	0	en	0
i guess the east and west have a dr jeckyll and mr hyde	i guess the east and west have a dr jeckyll and mr hyde	55	11	KxVbdGPAfjE	Beautiful China and traditional music	eec325a62ac20f60ddf62f21fd8d1f1e	@ibidydo	2012-08-18T17:18:32Z	0	en	0
the west is the same, our media gives us false newsflashes to shape the way we think. our leaders are likely more corrupt then chinas leaders. the scary part is. not alot of people belive this. russians know this, chinese know this. that;s why they dissaprove of a lot of wars the usa wants to fight. the west is capitalism at its worst! It's all about money people wake up! China is not so bad, onl…	the west is the same, our media gives us false newsflashes to shape the way we think. our leaders are likely more corrupt then chinas leaders. the scary part is. not alot of people belive this. russians know this, chinese know this. that;s why they dissaprove of a lot of wars the usa wants to fight. the west is capitalism at its worst! It's all about money people wake up! China is not so bad, onl…	444	84	KxVbdGPAfjE	Beautiful China and traditional music	a98eb2451b285bcb0cc43036ff3b0ac3	@niamha301	2012-08-17T14:22:42Z	0	en	0
What do you exactly mean with good wisdom and a positive hidden gift?:p	What do you exactly mean with good wisdom and a positive hidden gift?:p	71	12	KxVbdGPAfjE	Beautiful China and traditional music	88e548f484e1907440984dc880f86d77	@azfantje2006	2012-06-12T11:03:19Z	0	en	0
fair play. however on the other hand they have good wisdom and a positive hidden gift	fair play. however on the other hand they have good wisdom and a positive hidden gift	85	15	KxVbdGPAfjE	Beautiful China and traditional music	b20974ac31651fd970b9a92504cc0bdc	@ibidydo	2012-06-09T14:41:58Z	0	en	0
When was there peace in China? DUring history there hasn't been peace for a significant period in any part of the world mein Freund	When was there peace in China? DUring history there hasn't been peace for a significant period in any part of the world mein Freund	131	23	KxVbdGPAfjE	Beautiful China and traditional music	5b040133584970025a670c2b5d61f8c8	@azfantje2006	2012-06-07T14:12:25Z	0	en	0
wonderful once full of solitude and peace, now a mad communist leader is blinding everyone with a strict path of "do as your told" "no contrary thoughts". i may be of the west but i don't hate china	wonderful once full of solitude and peace, now a mad communist leader is blinding everyone with a strict path of "do as your told" "no contrary thoughts". i may be of the west but i don't hate china	198	34	KxVbdGPAfjE	Beautiful China and traditional music	079ec17c1203305b26de595357c259a2	@ibidydo	2012-05-03T14:11:42Z	0	en	0
Damn that beautiful...	Damn that beautiful...	22	3	KxVbdGPAfjE	Beautiful China and traditional music	b214a3d3a2102822bce484153dd90441	@zeldamasterX	2012-05-01T18:26:35Z	0	en	0
lol,your English is good ,then what ? Your Chinese is bad even can call rubbish. You live in China but don't know Chinese,I live in China but I can know English,that means you are a just a poor idiot. Don't show your little poor superiority.	lol,your English is good ,then what ? Your Chinese is bad even can call rubbish. You live in China but don't know Chinese,I live in China but I can know English,that means you are a just a poor idiot. Don't show your little poor superiority.	241	43	KxVbdGPAfjE	Beautiful China and traditional music	8665f40bb8b0247d1c810622dfe17eb5	@xiaowushuang	2012-04-12T15:47:08Z	0	en	0
So how do Han Chinese feel about ethnic Korean Chinese people? What if a Chinese Korean wanted to work in the China National Space Agency?	So how do Han Chinese feel about ethnic Korean Chinese people? What if a Chinese Korean wanted to work in the China National Space Agency?	138	24	KxVbdGPAfjE	Beautiful China and traditional music	54abdbc8041eb668c774cbf1bbd16ec1	@SammyCee23	2012-04-06T18:41:36Z	0	en	0
They can get college for education by lower scores.For instance,they can get in college by 540',while Han students must get in by 550-560'.They can born children as many as they want while Han people can only born 1-2 children.And have many prior policies on commerce.ect. Lots of. But sorry my English is not good enough to describle more.You can just find a enthic Korean,and communicate with him …	They can get college for education by lower scores.For instance,they can get in college by 540',while Han students must get in by 550-560'.They can born children as many as they want while Han people can only born 1-2 children.And have many prior policies on commerce.ect. Lots of. But sorry my English is not good enough to describle more.You can just find a enthic Korean,and communicate with him …	410	76	KxVbdGPAfjE	Beautiful China and traditional music	9267baab9d06b856a9e3185b6615ef86	@xiaowushuang	2012-04-06T18:06:56Z	0	en	0
ethnic Korean in China have more priority in many field? What do you mean? Can u explain that to me?	ethnic Korean in China have more priority in many field? What do you mean? Can u explain that to me?	100	19	KxVbdGPAfjE	Beautiful China and traditional music	e5c6e12b8be797aec8a66c154962bb57	@SammyCee23	2012-04-06T17:55:58Z	0	en	0
You can cut and paste again.who believe you who is idiot.	You can cut and paste again.who believe you who is idiot.	57	12	KxVbdGPAfjE	Beautiful China and traditional music	908081bd01fed57b61db5d149fabed38	@xiaowushuang	2012-04-06T17:08:04Z	0	en	0
Then do that.China also doesn't care.But the the fact is you are just dreaming.	Then do that.China also doesn't care.But the the fact is you are just dreaming.	79	16	KxVbdGPAfjE	Beautiful China and traditional music	4e752f2cb5b02801ff4c11eac6c25f3c	@xiaowushuang	2012-04-06T16:30:20Z	0	en	0
I am Han Chinese. Have any problem? I say ethnic Korean in China have more priority in many field.You can go to Heilongjiang province and ask those ethnic koreans about that.	I am Han Chinese. Have any problem? I say ethnic Korean in China have more priority in many field.You can go to Heilongjiang province and ask those ethnic koreans about that.	174	30	KxVbdGPAfjE	Beautiful China and traditional music	bb9541e65855e826222a0c51c077e332	@xiaowushuang	2012-04-06T16:28:04Z	0	en	0
You are so smart.	You are so smart.	17	4	KxVbdGPAfjE	Beautiful China and traditional music	9bfd431a2eee7aac6d67c915948ebb0d	@xiaowushuang	2012-04-06T16:23:58Z	0	en	0
I'm 100% sure you are either Japanese or Taiwanese. One or the other. Either way, you are a troll.	I'm 100% sure you are either Japanese or Taiwanese. One or the other. Either way, you are a troll.	98	17	KxVbdGPAfjE	Beautiful China and traditional music	9b63027c18a2a64e53997cd18eff8996	@SammyCee23	2012-04-04T22:56:35Z	0	en	0
nope its quite good actually these days.	nope its quite good actually these days.	40	7	KxVbdGPAfjE	Beautiful China and traditional music	903a568002b08c1d76930d91833f9c5f	@SammyCee23	2012-04-04T20:43:04Z	0	en	0
Is it bad to say you're Korean in China? What are you saying?	Is it bad to say you're Korean in China? What are you saying?	61	14	KxVbdGPAfjE	Beautiful China and traditional music	1e586d2c4e594c3da3d3cfa11a52fd42	@SammyCee23	2012-04-04T05:43:44Z	0	en	0
If they don't say they are ethnic koreans,we don't know.By the way,one of my college physic teacher is ethnic koreans,and i know this after i will graduate from the college. And the ethnic koreans have many preferential policies,like they can enter college with lower scores than Han koreans.	If they don't say they are ethnic koreans,we don't know.By the way,one of my college physic teacher is ethnic koreans,and i know this after i will graduate from the college. And the ethnic koreans have many preferential policies,like they can enter college with lower scores than Han koreans.	292	51	KxVbdGPAfjE	Beautiful China and traditional music	3254f68d03b95f46803ceb76e285960a	@xiaowushuang	2012-04-04T05:35:26Z	0	en	0
Ok good. So what if a Korean guy like me wanted to go to mainland China and become Chinese? i hear there are 2 million ethnic Koreans in China.	Ok good. So what if a Korean guy like me wanted to go to mainland China and become Chinese? i hear there are 2 million ethnic Koreans in China.	143	26	KxVbdGPAfjE	Beautiful China and traditional music	9dd8832d0369374b1bda74c6e591725d	@SammyCee23	2012-04-04T05:07:15Z	0	en	0
China don't think Koreans are enemy. I think you want to say "dislike".As i state above.Dislike is like you have a neibor who always annoy you,maybe you sometimes be angry,but it not make you hate him,and not make you treat him like a enemy.	China don't think Koreans are enemy. I think you want to say "dislike".As i state above.Dislike is like you have a neibor who always annoy you,maybe you sometimes be angry,but it not make you hate him,and not make you treat him like a enemy.	241	45	KxVbdGPAfjE	Beautiful China and traditional music	b71a881fd35fe4df7c11092089aa7738	@xiaowushuang	2012-04-04T04:55:47Z	0	en	0
So Chinese don't view Koreans as "hate is treating like a enemy"? And how's different from dislie	So Chinese don't view Koreans as "hate is treating like a enemy"? And how's different from dislie	97	16	KxVbdGPAfjE	Beautiful China and traditional music	94f9541d6996bb73c62cccd9a8c6ef7d	@SammyCee23	2012-04-04T04:44:50Z	0	en	0
Dislike is just dislike,and treat you just a little like annoying neibor.But hate is treating like a enemy.That is the different.	Dislike is just dislike,and treat you just a little like annoying neibor.But hate is treating like a enemy.That is the different.	129	22	KxVbdGPAfjE	Beautiful China and traditional music	fe30d9cebedcee55e33610595601947c	@xiaowushuang	2012-04-04T04:38:58Z	0	en	0
i want to come to China..as a korean. And what's the difference..?	i want to come to China..as a korean. And what's the difference..?	66	11	KxVbdGPAfjE	Beautiful China and traditional music	4d933bd1482fdf633abcf108053385b6	@SammyCee23	2012-04-04T04:33:03Z	0	en	0
If you want to know more,come to China or learn Chinese or ask others help,so you can serf China's internet and know more.Chinese don't hate SK,China just dislike SK.	If you want to know more,come to China or learn Chinese or ask others help,so you can serf China's internet and know more.Chinese don't hate SK,China just dislike SK.	166	33	KxVbdGPAfjE	Beautiful China and traditional music	488db0c491b794aefbd77a4aa4b71951	@xiaowushuang	2012-04-04T04:02:07Z	0	en	0
i heard that before. but I heard different things....	i heard that before. but I heard different things....	53	7	KxVbdGPAfjE	Beautiful China and traditional music	400f41f806ce23361b8282722ba33124	@SammyCee23	2012-04-03T16:58:50Z	0	en	0
I will tell you,but you should promise not to condemn me. China think South korea as culture stealer,and disself-confident about self culture. By Cring every thing is from SK to enhance its confidence. China's people dislike SK more than Japan,but hate Japan more than SK.	I will tell you,but you should promise not to condemn me. China think South korea as culture stealer,and disself-confident about self culture. By Cring every thing is from SK to enhance its confidence. China's people dislike SK more than Japan,but hate Japan more than SK.	272	48	KxVbdGPAfjE	Beautiful China and traditional music	06f12e65da5cb78235a92f981d5025f2	@xiaowushuang	2012-04-03T15:38:40Z	0	en	0
China is one of my fave countries next to France	China is one of my fave countries next to France	48	10	KxVbdGPAfjE	Beautiful China and traditional music	9f57f128c5554f73f6f48cdf473a164b	@marcuscollinsforever	2012-03-31T09:23:49Z	0	en	0
how do chinese feel about koreans?	how do chinese feel about koreans?	34	6	KxVbdGPAfjE	Beautiful China and traditional music	4aa0755f351c06568e4290a6b5b8b65f	@SammyCee23	2012-03-22T16:51:51Z	0	en	0
We Love China We Respect China	We Love China We Respect China	30	6	KxVbdGPAfjE	Beautiful China and traditional music	62efae67933b41ddbe820fa8ceb890a5	@khatpandwa	2012-02-29T10:10:38Z	0	en	0
Good song. When is the US going to bite the bullet and ally with China? Together we could control the world's economy and out gun every other nation on earth!	Good song. When is the US going to bite the bullet and ally with China? Together we could control the world's economy and out gun every other nation on earth!	158	30	KxVbdGPAfjE	Beautiful China and traditional music	7bea2b86af5d9603d97666e7f4f23b41	@KrazyKommieKiller	2012-02-02T19:05:24Z	0	en	0
@Timerooy i agree my friend...i agree...	@Timerooy i agree my friend...i agree...	40	5	KxVbdGPAfjE	Beautiful China and traditional music	c8ffc5a549d170971814c2400217fa89	@Mente_Magicka	2012-01-27T05:35:39Z	0	en	0
isn't youtube banned in china	isn't youtube banned in china	29	5	KxVbdGPAfjE	Beautiful China and traditional music	c4184035c25fa7bf31b01efc72b0a09f	@FourEyedMayhem	2011-11-24T14:07:42Z	0	en	0
@lovelesliehkfan thats shen nong mountain in henan province, it has been marked as subtitle	@lovelesliehkfan thats shen nong mountain in henan province, it has been marked as subtitle	91	14	KxVbdGPAfjE	Beautiful China and traditional music	417aff00d35d4f6cd158745e5db4b6f7	@lzhy83129	2011-11-21T23:19:00Z	0	en	0
where is this place exactly? I want to go there now! Need map coordinates for my Iron man suit. I'm ready to fly there now!	where is this place exactly? I want to go there now! Need map coordinates for my Iron man suit. I'm ready to fly there now!	123	23	KxVbdGPAfjE	Beautiful China and traditional music	a8be81d82bdeeb8419ba4fc0cb611a07	@triumphmanful	2011-11-18T21:31:48Z	0	en	0
lol can i has you backyard? please?	lol can i has you backyard? please?	35	6	KxVbdGPAfjE	Beautiful China and traditional music	a99166622163e07cfdde291d0f8f8237	@ZipsamCreations	2011-11-16T03:09:34Z	0	en	0
yeah I love China too, but I think China government is very stupid. I'm Vietnamese.	yeah I love China too, but I think China government is very stupid. I'm Vietnamese.	83	12	KxVbdGPAfjE	Beautiful China and traditional music	cd4c64bf588d0dbc91395c78da298b3e	@Alex-vnkh	2011-11-10T10:28:29Z	0	en	0
I believe the scenery is Wu Yi Mountain in Fujian province i've been there b4	I believe the scenery is Wu Yi Mountain in Fujian province i've been there b4	77	13	KxVbdGPAfjE	Beautiful China and traditional music	1e0d8428e8c30ffe780ee031f2704653	@lovelesliehkfan	2011-10-29T09:46:04Z	0	en	0
@Thendaryman Or did you mean which places would have remained? No place would have remained. Sorry if my english sucks.	@Thendaryman Or did you mean which places would have remained? No place would have remained. Sorry if my english sucks.	119	20	KxVbdGPAfjE	Beautiful China and traditional music	efd746b68577f03694e8ce32015cfa95	@Leksa135	2011-10-28T18:22:26Z	0	en	0
@Thendaryman For what time? And how should I know? And why are you asking?	@Thendaryman For what time? And how should I know? And why are you asking?	74	13	KxVbdGPAfjE	Beautiful China and traditional music	3cecbb13749e25d5dbb6895ce73839e2	@Leksa135	2011-10-28T14:11:09Z	0	en	0
@reggieobster If every Country, nation and people took back some land they once "owned", the worldmap wouldn't look the same. There probably wouldn't be such places as China or Russia etc.	@reggieobster If every Country, nation and people took back some land they once "owned", the worldmap wouldn't look the same. There probably wouldn't be such places as China or Russia etc.	188	31	KxVbdGPAfjE	Beautiful China and traditional music	3c7da69a820b7c84e6c7546baff97496	@Leksa135	2011-10-25T16:35:42Z	0	en	0
@reggieobster Have you ever visited Russia? I recommend you go there sometime. They have a beautiful nature there. It's not a "frozen humanless land".	@reggieobster Have you ever visited Russia? I recommend you go there sometime. They have a beautiful nature there. It's not a "frozen humanless land".	150	21	KxVbdGPAfjE	Beautiful China and traditional music	028841a49e2bbd35320a8cb14d013231	@Leksa135	2011-10-25T13:03:45Z	0	en	0
Why do some make such negative comments ... appreciate beauty.. there is so little of it left on this planet.	Why do some make such negative comments ... appreciate beauty.. there is so little of it left on this planet.	109	19	KxVbdGPAfjE	Beautiful China and traditional music	0797fb0efb6f9f98a3309dda23aaa293	@iakavos22	2011-10-23T23:55:35Z	0	en	0
too many humans vlad... not just chinese ..lead by example and do us all a favor ..get the Snip...cause we do without narrow minded people like you	too many humans vlad... not just chinese ..lead by example and do us all a favor ..get the Snip...cause we do without narrow minded people like you	147	27	KxVbdGPAfjE	Beautiful China and traditional music	de2e5e4ca69ec402d68fadb113d34924	@angiemoof	2011-10-23T12:37:43Z	0	en	0
I'm studying chinese, it's amazing..	I'm studying chinese, it's amazing..	36	4	KxVbdGPAfjE	Beautiful China and traditional music	202b74b2d4749fd50f8fc39810b9de98	@VioletVeronique	2011-10-13T20:41:31Z	0	en	0
why was this linked to: Relex ft. Kimiko - Summer Breeze	why was this linked to: Relex ft. Kimiko - Summer Breeze	56	10	KxVbdGPAfjE	Beautiful China and traditional music	cfe7718381b4671aaf74f8d94c48cb29	@Filther-13	2011-10-11T17:34:13Z	0	en	0
where is the viewpoint at the start?	where is the viewpoint at the start?	36	7	KxVbdGPAfjE	Beautiful China and traditional music	7bcfd948d78996dc53ee28539a736510	@gbman123	2011-10-05T09:30:51Z	0	en	0
@ponshki and America is a country that forces other countries to have that misery and pollution in order to save 5 dollars on a piece of shit shirt	@ponshki and America is a country that forces other countries to have that misery and pollution in order to save 5 dollars on a piece of shit shirt	147	25	KxVbdGPAfjE	Beautiful China and traditional music	9d6b0867980a4d5e72deb5de76660847	@sws212	2011-09-26T00:46:11Z	0	en	0
Fake!It's not the real China.China is a country with misery and pollution.	Fake!It's not the real China.China is a country with misery and pollution.	74	13	KxVbdGPAfjE	Beautiful China and traditional music	b1815f43b09c328eafb0ee4d436eaf1a	@ponshki	2011-09-19T13:43:08Z	0	en	0
I'm Thailand.I like china and this song because it makes me happy.	I'm Thailand.I like china and this song because it makes me happy.	66	11	KxVbdGPAfjE	Beautiful China and traditional music	3d81f6ec7557df9cc4156c2ec2473bc4	@TelecomEngineerMan	2011-09-05T13:34:54Z	0	en	0
@SeekeroftheOnes truest thign to ever come from a persons mouth er mind	@SeekeroftheOnes truest thign to ever come from a persons mouth er mind	71	11	KxVbdGPAfjE	Beautiful China and traditional music	7981a8c4324b24f39369e9760ce15696	@Diansonic	2011-09-01T01:54:51Z	0	en	0
@77777XYZ World War 2 ended 66 years ago you know. I wish Japanese and Chinese people would both realise that. China and Japan are both beautiful countries with rich history and culture. I'm not a big fan of the Chinese government, but the Chinese people and civilization are brilliant. Peace.	@77777XYZ World War 2 ended 66 years ago you know. I wish Japanese and Chinese people would both realise that. China and Japan are both beautiful countries with rich history and culture. I'm not a big fan of the Chinese government, but the Chinese people and civilization are brilliant. Peace.	293	47	KxVbdGPAfjE	Beautiful China and traditional music	1fec83dc842839c63d9c179fa755d48b	@skyhawk431	2011-08-30T14:40:41Z	0	en	0
@SeekeroftheOnes You're completely right. Modern science has actualy proven that there is no such thing as human races. The differences between black, white, asian etc are to small to be taken seriously in science and races are just sociological.	@SeekeroftheOnes You're completely right. Modern science has actualy proven that there is no such thing as human races. The differences between black, white, asian etc are to small to be taken seriously in science and races are just sociological.	246	40	KxVbdGPAfjE	Beautiful China and traditional music	7382a4dca26544c687ed71b7fedb2a2c	@skyhawk431	2011-08-30T14:35:24Z	0	en	0
@reggieobster Do you think he could say such things and then understand the evil-good thing? By his words you can understand that he haven't think about it at all.He just HATE.The really sad thing is that he is a japanese..He don't even respect the country from which his ancestors learned some things.But he probably knows nothing about history so yeah it is possible.But I believe that some Asian …	@reggieobster Do you think he could say such things and then understand the evil-good thing? By his words you can understand that he haven't think about it at all.He just HATE.The really sad thing is that he is a japanese..He don't even respect the country from which his ancestors learned some things.But he probably knows nothing about history so yeah it is possible.But I believe that some Asian …	482	89	KxVbdGPAfjE	Beautiful China and traditional music	8f5389dd1314a631e64fac35ad24d5ac	@hmthisisit	2011-08-28T08:24:41Z	0	en	0
@77777XYZ You are a disgrace to Japan...	@77777XYZ You are a disgrace to Japan...	40	7	KxVbdGPAfjE	Beautiful China and traditional music	1c5c02136f5bf37252ef4198c7f08540	@hmthisisit	2011-08-28T08:16:39Z	0	en	0
@SeekeroftheOnes I don't agree in everything you say but in general we have to start appreciate and respect some things about at least some cultures...	@SeekeroftheOnes I don't agree in everything you say but in general we have to start appreciate and respect some things about at least some cultures...	151	24	KxVbdGPAfjE	Beautiful China and traditional music	75086ea7e508359117ec04a33f438e2a	@hmthisisit	2011-08-28T08:11:51Z	0	en	0
this music is on Perfect World Online :P	this music is on Perfect World Online :P	40	7	KxVbdGPAfjE	Beautiful China and traditional music	e48c5c95b19d4db5fb4b8720cf671e63	@Tsufful	2011-08-20T17:56:00Z	0	en	0
@Buuub08 ok yeah someday ill visit.thanks for the info	@Buuub08 ok yeah someday ill visit.thanks for the info	54	11	KxVbdGPAfjE	Beautiful China and traditional music	0001999ea31ed936921d764c23f7e1e1	@darksantos1	2011-08-04T22:05:17Z	0	en	0
@Buuub08 thanks for the info, i guess it aint bad i want to visit someday idk if they accept foreigners to become citizens	@Buuub08 thanks for the info, i guess it aint bad i want to visit someday idk if they accept foreigners to become citizens	122	22	KxVbdGPAfjE	Beautiful China and traditional music	5a4cc45977bf5322b15d7f87428bcca7	@darksantos1	2011-08-04T15:50:20Z	0	en	0
@dustpelt1 terroris? since when have they started blowing building up? You mean communist influenced. There is no such thing as a terrorist nation.	@dustpelt1 terroris? since when have they started blowing building up? You mean communist influenced. There is no such thing as a terrorist nation.	147	22	KxVbdGPAfjE	Beautiful China and traditional music	14567b90e7c54bb8ee6283cf3434ba8d	@darksantos1	2011-07-31T04:48:34Z	0	en	0
@mark60060 just like every other brand in the world, things break so you buy more thats the point.	@mark60060 just like every other brand in the world, things break so you buy more thats the point.	98	19	KxVbdGPAfjE	Beautiful China and traditional music	f73d2ffd50ec6f1e576d0c2014024146	@darksantos1	2011-07-31T04:44:50Z	0	en	0
@allknowfather because the world is not perfect and if you dont know the feeling suffering then you will never ne able to taste peace.	@allknowfather because the world is not perfect and if you dont know the feeling suffering then you will never ne able to taste peace.	134	24	KxVbdGPAfjE	Beautiful China and traditional music	a6d2e2e4a7c8f77b3bf9922d15d5e581	@darksantos1	2011-07-31T04:40:55Z	0	en	0
@esrisongkham all ppl call ppl, naziz killed people, kkk killed people, the panthers killed ppl, every single race killed ppl you have really no right to judge some elses culture and political actions	@esrisongkham all ppl call ppl, naziz killed people, kkk killed people, the panthers killed ppl, every single race killed ppl you have really no right to judge some elses culture and political actions	200	33	KxVbdGPAfjE	Beautiful China and traditional music	57a01de29c206186f2cebd9e5a5409ab	@darksantos1	2011-07-31T04:39:49Z	0	en	0
@cwmak70 I dont know, right now there is more people in china then it used to, but the old china ignored all the poor workers that made the great wall and with alot of deaths all because of the Ying emperor and some others, believe it or not the PRC was made by those poor people who worked on the wall of china as well as the silk road, the silk road was made with hands not nature.	@cwmak70 I dont know, right now there is more people in china then it used to, but the old china ignored all the poor workers that made the great wall and with alot of deaths all because of the Ying emperor and some others, believe it or not the PRC was made by those poor people who worked on the wall of china as well as the silk road, the silk road was made with hands not nature.	383	78	KxVbdGPAfjE	Beautiful China and traditional music	32cdb1937ac4128a9d45d8127f04fdad	@darksantos1	2011-07-31T04:36:51Z	0	en	0
@tomlovegod True but not all of china is fully communist, beijing and honk kong are communist but not as much as they did back when mao zedong was in power. I agree its weird, alot of people in china live in peace sure you cant fully practice some religions but i quess the leaders reasearched in the backgrounds of religions	@tomlovegod True but not all of china is fully communist, beijing and honk kong are communist but not as much as they did back when mao zedong was in power. I agree its weird, alot of people in china live in peace sure you cant fully practice some religions but i quess the leaders reasearched in the backgrounds of religions	325	58	KxVbdGPAfjE	Beautiful China and traditional music	549858278c2dccdc1ed825461bbf5ca8	@darksantos1	2011-07-31T04:32:47Z	0	en	0
@77777XYZ punishment for china? why? they used to be controlled by many countries and now they're evil because they wanted their own kind of government? Before PRC china had a lot of people in poverty. Once the countries backed of the PRC was set to modernize china so they can stand a chance against other modern countries. If you were in their shoes back then you would have done the same.	@77777XYZ punishment for china? why? they used to be controlled by many countries and now they're evil because they wanted their own kind of government? Before PRC china had a lot of people in poverty. Once the countries backed of the PRC was set to modernize china so they can stand a chance against other modern countries. If you were in their shoes back then you would have done the same.	391	71	KxVbdGPAfjE	Beautiful China and traditional music	c624b1dbdb8614d08034d21e5617943a	@darksantos1	2011-07-31T04:30:08Z	0	en	0
I could not understand how anyone could dislike this video,until I got to .I have got to say you had a good video up to that point,and then you ruined it.10 thumbs down.	I could not understand how anyone could dislike this video,until I got to 3:56.I have got to say you had a good video up to that point,and then you ruined it.10 thumbs down.	169	32	KxVbdGPAfjE	Beautiful China and traditional music	6287cef30af06f3cae360095dabd5047	@BANANADAIQURI	2011-07-25T23:56:23Z	0	en	0
@ComplicatedLol I'm very proud of you, and hope that you spend more time to watch the entire video that I'll send it for you or you can click on my channel to watch it, we have to gather people to let them knowing the truth that what happen to our WORLD TODAY? And who did ALL that to ruin our PLANET today, did you know WHY so much fish & birds are die after the 8.9 Earth & Stunami in Sendai Japan…	@ComplicatedLol I'm very proud of you, and hope that you spend more time to watch the entire video that I'll send it for you or you can click on my channel to watch it, we have to gather people to let them knowing the truth that what happen to our WORLD TODAY? And who did ALL that to ruin our PLANET today, did you know WHY so much fish & birds are die after the 8.9 Earth & Stunami in Sendai Japan…	497	93	KxVbdGPAfjE	Beautiful China and traditional music	73c153af3182b99d1ba8e18ce18a8f5a	@21WorldStar	2011-07-18T20:09:06Z	0	en	0
@ComplicatedLol I'm proud of you, keep learn deeper than this, so you will find the entire answer that the Rothschild bankers was the one did all this to came to invaded not ONLY China alone, including Vietnam, Laos Cambodia & before that firstly was Africa then India way down to China & Korea, and nowadays Rothschild still contiue to use HAARP to destroyed China & Japan recently 2004 already des…	@ComplicatedLol I'm proud of you, keep learn deeper than this, so you will find the entire answer that the Rothschild bankers was the one did all this to came to invaded not ONLY China alone, including Vietnam, Laos Cambodia & before that firstly was Africa then India way down to China & Korea, and nowadays Rothschild still contiue to use HAARP to destroyed China & Japan recently 2004 already des…	500	82	KxVbdGPAfjE	Beautiful China and traditional music	9dd2413b4de49016b6de72ede88f285a	@21WorldStar	2011-07-18T20:00:03Z	0	en	0
@TheZortaw I totally agree!	@TheZortaw I totally agree!	27	3	KxVbdGPAfjE	Beautiful China and traditional music	10b4c9275eae42cd681122165ba613b2	@dmondblade	2011-07-15T04:48:47Z	0	en	0
@TheZortaw With you there! My sister in law is chinese.... a better person you'd be hard to find !!!	@TheZortaw With you there! My sister in law is chinese.... a better person you'd be hard to find !!!	100	17	KxVbdGPAfjE	Beautiful China and traditional music	a6f923958ad35bbc2662c9382bd1f344	@jennyfotos	2011-07-15T00:18:28Z	0	en	0
let haters be haters..they can only see and hear what's inside the box...and when they do come out of the box..china has already become the fast forward country and rule the world...hahahahahah	let haters be haters..they can only see and hear what's inside the box...and when they do come out of the box..china has already become the fast forward country and rule the world...hahahahahah	193	36	KxVbdGPAfjE	Beautiful China and traditional music	ec2b9b97c2f84cfb51797e6288f02127	@dinglin09	2011-07-08T04:48:16Z	0	en	0
@TheHabati idk i might be guilin... at least thats where i consider my best holiday eva XXD!	@TheHabati idk i might be guilin... at least thats where i consider my best holiday eva XXD!	92	15	KxVbdGPAfjE	Beautiful China and traditional music	47b808a6432c70a9c02ae9023a853143	@AndroidGZS	2011-07-05T04:28:49Z	0	en	0
i feel like going to a Chinese buffet	i feel like going to a Chinese buffet	37	6	KxVbdGPAfjE	Beautiful China and traditional music	d143455acbf51eab53512eedf4600b97	@octoron85	2011-06-28T04:31:16Z	0	en	0
China is a land of culture and philosophy. The outsider will likely overlook this fact.	China is a land of culture and philosophy. The outsider will likely overlook this fact.	87	14	KxVbdGPAfjE	Beautiful China and traditional music	5be7a6214d6c6d7972b4779be0b8b593	@wgh999	2011-06-22T22:18:44Z	0	en	0
What's with the tags on this video? :-/	What's with the tags on this video? :-/	39	7	KxVbdGPAfjE	Beautiful China and traditional music	3388d4ea8ec6f7e9dcfdb14d16d498bc	@sunmoonstars415	2011-06-21T00:35:25Z	0	en	0
@krisDM3000 hey its not cool some people can't afford it, i am Greek so imagine how much culture and language i have in me ?(: i speak Spanish, French, English ,Greek, Ancient Greek, learning Korean & Arabic.. if i have the money i will for sure go to Asia it has been my dream! iv'e been to the middle east all of europe south america, mexico basically ima very cultured american ( but with Greek h…	@krisDM3000 hey its not cool some people can't afford it, i am Greek so imagine how much culture and language i have in me ?(: i speak Spanish, French, English ,Greek, Ancient Greek, learning Korean & Arabic.. if i have the money i will for sure go to Asia it has been my dream! iv'e been to the middle east all of europe south america, mexico basically ima very cultured american ( but with Greek h…	423	72	KxVbdGPAfjE	Beautiful China and traditional music	8c304731f2c2fa9305cd1816cbe546b0	@AzulionMasta	2011-06-19T04:07:56Z	0	en	0
@ComplicatedLol and china may invade Philippines this year!	@ComplicatedLol and china may invade Philippines this year!	59	8	KxVbdGPAfjE	Beautiful China and traditional music	894314e2faed258837336a6014dbadce	@Luffy3713	2011-06-06T21:58:31Z	0	en	0
and china may invade Philippines this year!	and china may invade Philippines this year!	43	7	KxVbdGPAfjE	Beautiful China and traditional music	52cfa18175d13921c4e319b945a2f266	@Luffy3713	2011-06-06T21:58:24Z	0	en	0
wow great video thanks for posting it.	wow great video thanks for posting it.	38	7	KxVbdGPAfjE	Beautiful China and traditional music	7bfb91e74203592f44ec66320a16a766	@ELPaso1990TX	2011-06-02T22:09:53Z	0	en	0
It's sooooo beautiful!!!! I wan't to go there!!!!	It's sooooo beautiful!!!! I wan't to go there!!!!	49	7	KxVbdGPAfjE	Beautiful China and traditional music	780368b68a07afc1f28d1145b89617c5	@weidside	2011-05-17T00:22:57Z	0	en	0
Politics ruin great things, ancient China. They need to free Tibet and live up to the legend. Politics... one of the greatest evil this world has faced.	Politics ruin great things, ancient China. They need to free Tibet and live up to the legend. Politics... one of the greatest evil this world has faced.	152	27	KxVbdGPAfjE	Beautiful China and traditional music	02d98015beebe7faaea48e14437739a0	@lothlorien1is1heaven	2011-05-15T01:29:14Z	0	en	0
i want to go to korea china and japan and be enhanced by its beauty	i want to go to korea china and japan and be enhanced by its beauty	67	14	KxVbdGPAfjE	Beautiful China and traditional music	76c68a40a1ea5ff5ba95e46296d89821	@FuryOfTheSwarm	2011-05-14T05:41:55Z	0	en	0
Beautiful mountains relaxing music....	Beautiful mountains relaxing music....	38	4	KxVbdGPAfjE	Beautiful China and traditional music	ff2a3ba7645980a45f83a473b26db6cf	@drmikethom	2011-05-13T22:00:47Z	0	en	0
@Shaolinkungfucat - Is that the best you can do? Pathetic.	@Shaolinkungfucat - Is that the best you can do? Pathetic.	58	9	KxVbdGPAfjE	Beautiful China and traditional music	3e03aa4f9e0c389e9c30ecf3a61dfeb7	@andrewshere	2011-05-11T13:38:58Z	0	en	0
CCTV! I remember that, I went to china with school for three weeks and there was only one english speaking channel and it was cctv! God I miss beijing and china so much.	CCTV! I remember that, I went to china with school for three weeks and there was only one english speaking channel and it was cctv! God I miss beijing and china so much.	169	30	KxVbdGPAfjE	Beautiful China and traditional music	c6bd07a4b5b98e441b3f488658b7a612	@rockguru123	2011-05-04T17:29:13Z	0	en	0
@darkruler65 well,since there are many many chinese,it`'s easy to see a bunch of bananas coming out from the community. besides,china is a very complicate country~	@darkruler65 well,since there are many many chinese,it`'s easy to see a bunch of bananas coming out from the community. besides,china is a very complicate country~	163	27	KxVbdGPAfjE	Beautiful China and traditional music	04d8f8929f253a8577956001850e6bc1	@wlwlnana	2011-04-21T23:10:40Z	0	en	0
my beautiful motherland))protect yourself,then go ahead.I am always here for you)	my beautiful motherland))protect yourself,then go ahead.I am always here for you)	81	13	KxVbdGPAfjE	Beautiful China and traditional music	52c8a934516b8d18cfd004493c99a9d1	@wlwlnana	2011-04-21T23:06:21Z	0	en	0
I pity the people who want to go to exotic locations such as the Caribbean all the time while you have such an incredible culture, landscape, architecture and so much more in China. If I ever get the chance, China will be my holiday destination number 1	I pity the people who want to go to exotic locations such as the Caribbean all the time while you have such an incredible culture, landscape, architecture and so much more in China. If I ever get the chance, China will be my holiday destination number 1	253	44	KxVbdGPAfjE	Beautiful China and traditional music	3500be30e4c3ca4ebea852e3ce1da9b3	@krisDM3000	2011-04-13T10:46:58Z	0	en	0
@fuyanfu27118177 Sadly, I'm probably getting a bit old now and it would be difficult to afford a trip to China from Australia. It is a magnificent country, and the scenery in this video is amazing. I'm also a fan of some Chinese music, even though I can't speak the language. I love the melodies, and some of their voices are excellent.	@fuyanfu27118177 Sadly, I'm probably getting a bit old now and it would be difficult to afford a trip to China from Australia. It is a magnificent country, and the scenery in this video is amazing. I'm also a fan of some Chinese music, even though I can't speak the language. I love the melodies, and some of their voices are excellent.	336	54	KxVbdGPAfjE	Beautiful China and traditional music	1586f7d61d7353f8dbabe56de6807da1	@MrDonjhamilton	2011-04-11T06:20:49Z	0	en	0
That guy named Phimmmm is obviously jealous about China's splendid landscape! He is so mean that he refuses to accept China's regaining of power on the world fairs arena. And what's more, those pol like Phimmmm are hating China out of no reason. But one thing cannot be changed is that------people around the world are getting more and more interested in this country, and more and more people have …	That guy named Phimmmm is obviously jealous about China's splendid landscape! He is so mean that he refuses to accept China's regaining of power on the world fairs arena. And what's more, those pol like Phimmmm are hating China out of no reason. But one thing cannot be changed is that------people around the world are getting more and more interested in this country, and more and more people have …	498	88	KxVbdGPAfjE	Beautiful China and traditional music	fd57b0e30cf27364263b5d4e79ad8c7c	@ChandelierDemocraticSino	2011-04-11T02:26:36Z	0	en	0
I wished the old China never did change... It would be an awesome sight and a beautiful place to live in. Back then, the chinese were well mannered, educated and they have a rich tradition but as the world changes, so did the people. It's sad...	I wished the old China never did change... It would be an awesome sight and a beautiful place to live in. Back then, the chinese were well mannered, educated and they have a rich tradition but as the world changes, so did the people. It's sad...	245	43	KxVbdGPAfjE	Beautiful China and traditional music	f92b6bd138535a3e54371254c6fc5a07	@MakCw	2011-04-09T10:32:45Z	0	en	0
does anyone know what this piece of music is called?	does anyone know what this piece of music is called?	52	10	KxVbdGPAfjE	Beautiful China and traditional music	85ddf56c8354aac9ed634c155f5fc3f5	@BlikNWiteBoi	2011-04-08T19:56:18Z	0	en	0
wow soo beautiful. jus lay down flat on the ground, turn of the lights, smoke a little, and then listen to this song. wow soo peaceful. i love how everybody comes together in these comments without fighting. i see a bunch of different religions and races all together in the past comments and no one is being. everyone comes together as one in harmony and peace. soo beautiful just like this song. t…	wow soo beautiful. jus lay down flat on the ground, turn of the lights, smoke a little, and then listen to this song. wow soo peaceful. i love how everybody comes together in these comments without fighting. i see a bunch of different religions and races all together in the past comments and no one is being. everyone comes together as one in harmony and peace. soo beautiful just like this song. t…	420	71	KxVbdGPAfjE	Beautiful China and traditional music	c8f94998272c152c9eac9f2b23407aa7	@yoho951	2011-04-05T00:25:02Z	0	en	0
if only are country looked like that	if only are country looked like that	36	7	KxVbdGPAfjE	Beautiful China and traditional music	e605f49975cfb95b6d6f7d704198a5d8	@Dragonfire4561	2011-04-03T02:57:04Z	0	en	0
Have Serbian people just discovered the internet? Lots of videos I go on have comments from Serbians now, none used to!	Have Serbian people just discovered the internet? Lots of videos I go on have comments from Serbians now, none used to!	119	20	KxVbdGPAfjE	Beautiful China and traditional music	b4684c5dd7865a6fd7bbc520fadf02af	@mmeister2	2011-04-02T05:52:37Z	0	en	0
Im from Serbiaaaa!!! And I respect China coulture,but in these days China is really slyping away....I wish old days had never end...World whould be such beautiful and better place!!! Ahhhh,only thing I can do is hope that people whould stop desrtoying this planet...	Im from Serbiaaaa!!! And I respect China coulture,but in these days China is really slyping away....I wish old days had never end...World whould be such beautiful and better place!!! Ahhhh,only thing I can do is hope that people whould stop desrtoying this planet...	266	44	KxVbdGPAfjE	Beautiful China and traditional music	73e84dc3b4fee2d2cfa1e9f3bfd150ab	@WaxyLittlemonster	2011-03-31T15:11:53Z	0	en	0
@andrewshere True, I've lived in China...	@andrewshere True, I've lived in China...	41	6	KxVbdGPAfjE	Beautiful China and traditional music	b4cd2faaa79e3c4b9248c68b76e7d057	@SiCGaming123	2011-03-30T19:41:52Z	0	en	0
THIS REMINDS ME ON DRAGON BALL	THIS REMINDS ME ON DRAGON BALL	30	6	KxVbdGPAfjE	Beautiful China and traditional music	f223c53025af832d0d6e0831af4d0479	@ChingChangTV	2011-03-27T09:49:09Z	0	en	0
@andrewshere Yes, I have taken Japanese class, I have researched on culture, of other Asian countries like Japan, Korea, Vietnam, etc. and from what I noticed, to most of the neighboring countries, China was big place, such a rich country, with rich history and diverse landscape. Most of these countries adopted parts of its culture, language, food and architecture. It seems like China was like th…	@andrewshere Yes, I have taken Japanese class, I have researched on culture, of other Asian countries like Japan, Korea, Vietnam, etc. and from what I noticed, to most of the neighboring countries, China was big place, such a rich country, with rich history and diverse landscape. Most of these countries adopted parts of its culture, language, food and architecture. It seems like China was like th…	454	73	KxVbdGPAfjE	Beautiful China and traditional music	cf82351cc34d87fdca820f1dddfda751	@supermonk3y07	2011-03-03T21:28:10Z	0	en	0
Those mountains are gigantic. China is a very beautiful place, regardless of its political reputation.	Those mountains are gigantic. China is a very beautiful place, regardless of its political reputation.	102	14	KxVbdGPAfjE	Beautiful China and traditional music	27a9f67b3f04ad3e0af698e2fe811382	@FreshPrinceCM	2011-03-02T04:40:05Z	0	en	0
@tomlovegod - I completely agree, every country has room to improve. Sorry to hear about your bad experience and I hope you're better now. I look at this video and I see how beautiful China is. I listen to this music and it touches my heart. What I see and hear here is dignity and pride. But when I see the widespread fakes and shameless denial I feel so frustrated. Chinese people don't need to do…	@tomlovegod - I completely agree, every country has room to improve. Sorry to hear about your bad experience and I hope you're better now. I look at this video and I see how beautiful China is. I listen to this music and it touches my heart. What I see and hear here is dignity and pride. But when I see the widespread fakes and shameless denial I feel so frustrated. Chinese people don't need to do…	496	85	KxVbdGPAfjE	Beautiful China and traditional music	83420bb5582e3bff4521cc10b71ad41a	@andrewshere	2011-02-26T13:34:19Z	0	en	0
Nice Video - Nice Music	Nice Video - Nice Music	23	4	KxVbdGPAfjE	Beautiful China and traditional music	100518c353450d2deb4cd5e971e16c3f	@khatpandwa	2011-02-25T00:19:07Z	0	en	0
I love China more then everything in the world,Even I am Pakistani British	I love China more then everything in the world,Even I am Pakistani British	74	12	KxVbdGPAfjE	Beautiful China and traditional music	1e7853abb4df3a4d6f5743d4122ae8ca	@syedsohailshah1	2011-02-12T03:48:42Z	0	en	0
@anarhy09 Don't get me wrong - I think it's great that China has started to give its people economic freedom, and many Made In China goods are excellent (Recording King Guitars, for example). Not wanting to import external brands is fine too, but counterfeiting and copying other established brands is not. And then to claim that these obvious rip-offs are original just makes the world laugh. China…	@anarhy09 Don't get me wrong - I think it's great that China has started to give its people economic freedom, and many Made In China goods are excellent (Recording King Guitars, for example). Not wanting to import external brands is fine too, but counterfeiting and copying other established brands is not. And then to claim that these obvious rip-offs are original just makes the world laugh. China…	432	74	KxVbdGPAfjE	Beautiful China and traditional music	b4561467ab8cbf2d19b644ee733f8260	@andrewshere	2011-02-07T22:51:18Z	0	en	0
@KixxSasuke why produced in china? simply because people are CHEAP XDDD	@KixxSasuke why produced in china? simply because people are CHEAP XDDD	71	11	KxVbdGPAfjE	Beautiful China and traditional music	3910fd6d075bb952aad261640e255f4e	@mark60060	2011-01-25T23:31:55Z	0	en	0
@mark60060 ur an idiot	@mark60060 ur an idiot	22	5	KxVbdGPAfjE	Beautiful China and traditional music	f6a2be8044bcc9200a42612359d63ee6	@paladinxtank	2011-01-25T20:24:17Z	0	en	0
i don´t know if any of you are reading the titles of videos but.. it says beautiful traditional music not come here to complain about which country is the best.	i don´t know if any of you are reading the titles of videos but.. it says beautiful traditional music not come here to complain about which country is the best.	160	29	KxVbdGPAfjE	Beautiful China and traditional music	10cfdea4c26ae02ef88b87ef1dd5b5c3	@paladinxtank	2011-01-25T17:53:33Z	0	en	0
@mark60060 mm.. mark China is going great in the Economy and is even becoming bigger than America.	@mark60060 mm.. mark China is going great in the Economy and is even becoming bigger than America.	98	18	KxVbdGPAfjE	Beautiful China and traditional music	38a0bdfd6dfc83af06feb367ec820114	@paladinxtank	2011-01-25T17:51:00Z	0	en	0
MADE IN CHINA = dirty, cheap, contaminated, easily broken and poor quality.	MADE IN CHINA = dirty, cheap, contaminated, easily broken and poor quality.	75	11	KxVbdGPAfjE	Beautiful China and traditional music	cc85b3345a82c60f625e10e3eec92723	@mark60060	2011-01-19T14:54:19Z	0	en	0
Somebody like to make mischief between Chinese people and government.	Somebody like to make mischief between Chinese people and government.	69	10	KxVbdGPAfjE	Beautiful China and traditional music	00131aa94d621bc1e2c5e86eaf742f94	@Chanchyin	2011-01-17T18:22:41Z	0	en	0
NO ONE GIVES A FUCK ABOUT YOUR TERRITORY DISPUTES. IT DOESN'T MATTER. AT THE END OF THE DAY YOU ARE ALL STILL ANIMALS THAT CANT UNITE. STAY THE FUCK OFF YOUTUBE.	NO ONE GIVES A FUCK ABOUT YOUR TERRITORY DISPUTES. IT DOESN'T MATTER. AT THE END OF THE DAY YOU ARE ALL STILL ANIMALS THAT CANT UNITE. STAY THE FUCK OFF YOUTUBE.	161	30	KxVbdGPAfjE	Beautiful China and traditional music	10d7af356c5fc6cce5646b0770914efa	@thunderdragon14	2011-01-15T23:09:52Z	0	en	0
China has such a rich history and such a beautiful landscape. I feel really frustrated that the Chinese government allows so many fakes - Gundam, McDnoald's (not a typo), Bucksstar Coffee (yes, really), KFC logo, Disneyland (Shijingshan Amusement Park), Martin guitars.... and China insists these are not fakes or copies (the Expo official song is another example of outright denial). The whole worl…	China has such a rich history and such a beautiful landscape. I feel really frustrated that the Chinese government allows so many fakes - Gundam, McDnoald's (not a typo), Bucksstar Coffee (yes, really), KFC logo, Disneyland (Shijingshan Amusement Park), Martin guitars.... and China insists these are not fakes or copies (the Expo official song is another example of outright denial). The whole worl…	498	75	KxVbdGPAfjE	Beautiful China and traditional music	e500b4ca5d5d30078e07344d12af15ac	@andrewshere	2011-01-08T16:27:04Z	0	en	0
i'm already living in china!i was born in hong kong!	i'm already living in china!i was born in hong kong!	52	9	KxVbdGPAfjE	Beautiful China and traditional music	bca50adb16986deed2683858bb4d7f1f	@2010inshara786	2011-01-05T11:26:18Z	0	en	0
Beautiful - Wonderful - Thanks	Beautiful - Wonderful - Thanks	30	3	KxVbdGPAfjE	Beautiful China and traditional music	5bca93205e84b897a2fd2242e2631056	@khatpandwa	2011-01-03T16:32:12Z	0	en	0
@latifisthebest I'm from Mexico and I likeTraditional Chinese music too	@latifisthebest I'm from Mexico and I likeTraditional Chinese music too	71	8	KxVbdGPAfjE	Beautiful China and traditional music	b329ffa4db5e5299bc341dd0643556ea	@supermonk3y07	2011-01-03T16:20:36Z	0	en	0
im from england chinese music is the best	im from england chinese music is the best	41	8	KxVbdGPAfjE	Beautiful China and traditional music	6cf3424ea6eb7842b70e2a460d8cc4eb	@latifisthebest	2011-01-03T09:44:24Z	0	en	0
I love China. But the Chinese government - NOT. VIVA DEMOCRACY! FREEDOM FOR EACH PEOPLE!	I love China. But the Chinese government - NOT. VIVA DEMOCRACY! FREEDOM FOR EACH PEOPLE!	88	13	KxVbdGPAfjE	Beautiful China and traditional music	898d0b42be5ad79c9b2102bab13dda75	@Mykola40	2010-12-30T17:48:15Z	0	en	0
@dustpelt1 Thnx Lol Still China has a beautiful Nature and Culture But you're right nowadays China is a Communist, Bad place	@dustpelt1 Thnx Lol Still China has a beautiful Nature and Culture But you're right nowadays China is a Communist, Bad place	124	20	KxVbdGPAfjE	Beautiful China and traditional music	dffd15ae3aa9941911740c18ee1ee2a9	@Doug.Dimmadome	2010-12-30T00:09:00Z	0	en	0
North Korea=Terrorist nation China supports it so China also=terrorist nation.	North Korea=Terrorist nation China supports it so China also=terrorist nation.	78	12	KxVbdGPAfjE	Beautiful China and traditional music	f5d1565f899d170ad20b3e06bfaad7da	@dustpelt1	2010-12-25T00:27:15Z	0	en	0
Ever since the Soviet Union, China has been a unfair, communist country and has mistreated many Tibetans and abused them. This guy was having a vacation in china when the Chinese government guards robbed him! Communism should be destroyed!!!! Down with communism!!	Ever since the Soviet Union, China has been a unfair, communist country and has mistreated many Tibetans and abused them. This guy was having a vacation in china when the Chinese government guards robbed him! Communism should be destroyed!!!! Down with communism!!	264	40	KxVbdGPAfjE	Beautiful China and traditional music	5819c31f490ee8a5b5f4480eb9a2a2e9	@dustpelt1	2010-12-25T00:25:19Z	0	en	0
I like china in the ancient times. Now, China is a polluted, communist, ruined and robbed of it's beauty. I still like Europe better though.	I like china in the ancient times. Now, China is a polluted, communist, ruined and robbed of it's beauty. I still like Europe better though.	140	22	KxVbdGPAfjE	Beautiful China and traditional music	4002838869ffb6ce44787fe61a625917	@dustpelt1	2010-12-25T00:20:59Z	0	en	0
Im from Serbia. I love China. China rocks!	Im from Serbia. I love China. China rocks!	42	7	KxVbdGPAfjE	Beautiful China and traditional music	17d8572a40daf147b0440122fde31551	@1603991	2010-12-25T00:07:17Z	0	en	0
I love China too, but I mostly love Tibet! Anyway, beautiful music! KOSOVA IS ALBANIA! Serbs came into Balkan Peninsula from Urals.	I love China too, but I mostly love Tibet! Anyway, beautiful music! KOSOVA IS ALBANIA! Serbs came into Balkan Peninsula from Urals.	131	20	KxVbdGPAfjE	Beautiful China and traditional music	a53279a772eeaad45d87f7b391bf3fba	@LeoVlora	2010-12-14T13:22:45Z	0	en	0
My opinion! Iran and Nord Korea are placed for injustice with these sanctions Big protest I recommend changing in FN four more Nations as a permanent members of security council BRAZIL LYBIA SYRIEN IRAN.,,,,,I´m not surprised that East Timor showed op at the last second and was chosen instead of Iran in a department within FN.An old APPROACH.,,,,mar kjartansson 24t blog Mingler	My opinion! Iran and Nord Korea are placed for injustice with these sanctions Big protest I recommend changing in FN four more Nations as a permanent members of security council BRAZIL LYBIA SYRIEN IRAN.,,,,,I´m not surprised that East Timor showed op at the last second and was chosen instead of Iran in a department within FN.An old APPROACH.,,,,mar kjartansson 24t blog Mingler	380	61	KxVbdGPAfjE	Beautiful China and traditional music	a4767fc6345aa26eb1805f2259b067ac	@markjartansson	2010-12-10T13:34:55Z	0	en	0
@SRBIJA774 Agreed, China is very beautiful. Great people, awesome food. Love Serbia too. You guys have struggled a lot over the years and I love your country. But I support Kosovo all the way. I LOVE THE USA!	@SRBIJA774 Agreed, China is very beautiful. Great people, awesome food. Love Serbia too. You guys have struggled a lot over the years and I love your country. But I support Kosovo all the way. I LOVE THE USA!	208	35	KxVbdGPAfjE	Beautiful China and traditional music	7031116508c742170ca97ee5ebae1a75	@ohioiran122	2010-12-09T01:58:48Z	0	en	0
All those China hater fuckoff!	All those China hater fuckoff!	30	5	KxVbdGPAfjE	Beautiful China and traditional music	5f6ba075fa25d00ec87efa8d373df2f5	@Chanchyin	2010-12-05T13:51:38Z	0	en	0
@TheChinksKiller go to hell !! china is the best , i love that country damn it !	@TheChinksKiller go to hell !! china is the best , i love that country damn it !	80	13	KxVbdGPAfjE	Beautiful China and traditional music	d9f5b0815a6e4989ff0f5620ee88ce15	@freakloulou	2010-12-01T09:11:27Z	0	en	0
@30309020 It is a very beautiful city. I love the Bing Ling Buddhist caves. Truly remarkable.	@30309020 It is a very beautiful city. I love the Bing Ling Buddhist caves. Truly remarkable.	93	14	KxVbdGPAfjE	Beautiful China and traditional music	a9a528cf3f53bf7220359ce0e0682929	@greenmotorcar	2010-11-29T16:30:11Z	0	en	0
@greenmotorcar haha , I come from Lanzhou ~~~	@greenmotorcar haha , I come from Lanzhou ~~~	45	5	KxVbdGPAfjE	Beautiful China and traditional music	a964ac557433fd02bd88b260ae7adc25	@30309020	2010-11-28T09:55:56Z	0	en	0
Love China too, but especially I love Tibet! Greatings from Italy, Kosovo is Albania!	Love China too, but especially I love Tibet! Greatings from Italy, Kosovo is Albania!	85	13	KxVbdGPAfjE	Beautiful China and traditional music	9369fad05ce155e6552cd437c5f786e7	@LeoVlora	2010-11-27T18:21:25Z	0	en	0
@waters2100 not sure about the politics shit	@waters2100 not sure about the politics shit	44	8	KxVbdGPAfjE	Beautiful China and traditional music	da71b2e6a93c0f4a18948895a087e79b	@raeviliss3	2010-11-27T16:33:29Z	0	en	0
@waters2100 No country can truly be great until the people can speak out against their government without fear. My wife is Chinese, born and raised within Lanzhou, and even she says the government is not there by the choice of the people, but because of the government is there because it outlaws all competition.	@waters2100 No country can truly be great until the people can speak out against their government without fear. My wife is Chinese, born and raised within Lanzhou, and even she says the government is not there by the choice of the people, but because of the government is there because it outlaws all competition.	313	55	KxVbdGPAfjE	Beautiful China and traditional music	8107f9adcc5b48ed047d5b5fc36d40d0	@greenmotorcar	2010-11-26T21:09:56Z	0	en	0
@waters2100 well thanks.... not really though.... well, it's not like I am proud to be part of europe.... nor would I want to be part of the US nor would I want to be a part of china. every country/ part of the world has it's own "bad" points.... I greet with you with no harm meant by this comment.	@waters2100 well thanks.... not really though.... well, it's not like I am proud to be part of europe.... nor would I want to be part of the US nor would I want to be a part of china. every country/ part of the world has it's own "bad" points.... I greet with you with no harm meant by this comment.	299	56	KxVbdGPAfjE	Beautiful China and traditional music	84fc7d31fe2cbfb05cf72ca38edf3325	@Hunlover123601	2010-11-22T07:00:42Z	0	en	0
@gibraltadude ... So who is going to help them? Maybe love can cover and overcome hatred...	@gibraltadude ... So who is going to help them? Maybe love can cover and overcome hatred...	91	15	KxVbdGPAfjE	Beautiful China and traditional music	380056ac074caa3c5830423f25b7e95b	@WinsomeInternational	2010-11-13T04:35:27Z	0	en	0
@waters2100 People's judgement of China surely isn't always adequate, but the government definitely isn't "great". Even though there's probably a lot of good (good and bad depends on you point of view of course) politicians, there's still many things wrong in the political department. Think about censorship and people like Liu Xiaobo being in prison.	@waters2100 People's judgement of China surely isn't always adequate, but the government definitely isn't "great". Even though there's probably a lot of good (good and bad depends on you point of view of course) politicians, there's still many things wrong in the political department. Think about censorship and people like Liu Xiaobo being in prison.	352	55	KxVbdGPAfjE	Beautiful China and traditional music	0871a4319cb5a438367d691ad026715a	@Ciferz	2010-11-12T11:41:24Z	0	en	0
china music is the best! <3	china music is the best! <3	27	5	KxVbdGPAfjE	Beautiful China and traditional music	a9f01b503a6a7290cc5640b757952d7c	@noben100	2010-11-11T12:36:04Z	0	en	0
@armyboy24 i think its more like long live ASIA lolz : D	@armyboy24 i think its more like long live ASIA lolz : D	56	10	KxVbdGPAfjE	Beautiful China and traditional music	474ce4d50af24321a6da47b238a9c59c	@DemonEyesKyo258	2010-11-09T08:41:55Z	0	en	0
@waters2100 lol what?	@waters2100 lol what?	21	4	KxVbdGPAfjE	Beautiful China and traditional music	aa77b1382c2500dcd18d49474e629db2	@FMAiscool	2010-10-27T23:25:41Z	0	en	0
@relaxingmusic101 That was just ridiculous.	@relaxingmusic101 That was just ridiculous.	43	6	KxVbdGPAfjE	Beautiful China and traditional music	c274a91f2c5946aef7de85b0e41773b3	@TheAverageCanadian	2010-10-24T19:26:17Z	0	en	0
@huvanithergidyin middle-south of china...changsha yeah, i have been to a lot of cities in china. i think is beautiful in most of china	@huvanithergidyin middle-south of china...changsha yeah, i have been to a lot of cities in china. i think is beautiful in most of china	135	22	KxVbdGPAfjE	Beautiful China and traditional music	43194b7560f846054a4548b847ac03f7	@tanchushu	2010-10-24T00:57:34Z	0	en	0
@tanchushu I lived in Guangxi, Beihai city for 3 years, and also in Shandong, Dongying city for 1 year, and I want to settle down in China.	@tanchushu I lived in Guangxi, Beihai city for 3 years, and also in Shandong, Dongying city for 1 year, and I want to settle down in China.	139	23	KxVbdGPAfjE	Beautiful China and traditional music	cc2274dbcde06562f7b5c7c3bf5e6beb	@huvanithergidyin	2010-10-23T23:33:35Z	0	en	0
@tanchushu Where in China are you from ? I lived in China for 4 years, and I love China, it is a far more peaceful country than any other country that I have lived in.	@tanchushu Where in China are you from ? I lived in China for 4 years, and I love China, it is a far more peaceful country than any other country that I have lived in.	167	29	KxVbdGPAfjE	Beautiful China and traditional music	aae491ae004b46873984eb0d4bfc94ff	@huvanithergidyin	2010-10-23T23:28:49Z	0	en	0
@wgh999 Norway is in north west Europe, looking into the North sea wich divides Europe from the UK	@wgh999 Norway is in north west Europe, looking into the North sea wich divides Europe from the UK	98	19	KxVbdGPAfjE	Beautiful China and traditional music	b00f435dedfc379910ebd4cc48151513	@huvanithergidyin	2010-10-23T23:26:07Z	0	en	0
@gkberg Where is Norway?	@gkberg Where is Norway?	24	4	KxVbdGPAfjE	Beautiful China and traditional music	d18b82687fe5c4d696488d1c67e26471	@wgh999	2010-10-23T14:41:45Z	0	en	0
@gkberg why you said china hate your country? I am from china but i never heard any news about the opposide part of Norway.(Maybe we have some bad news about USA and UK that's true...)	@gkberg why you said china hate your country? I am from china but i never heard any news about the opposide part of Norway.(Maybe we have some bad news about USA and UK that's true...)	184	34	KxVbdGPAfjE	Beautiful China and traditional music	92bb24e0f7ac55915e6ec40a77ebcba7	@tanchushu	2010-10-22T02:03:53Z	0	en	0
I like this mucik, but china hate my country. I come from Norway	I like this mucik, but china hate my country. I come from Norway	64	11	KxVbdGPAfjE	Beautiful China and traditional music	ef195be3194652d8c6ef1dbdd215ba08	@gkberg	2010-10-21T16:58:16Z	0	en	0
My friend and I making plans to move to China in the next couple of years. We want to enjoy life and appreciate the best of what generations of culture and natural beauty can offer. Those are things that you will never find in america.	My friend and I making plans to move to China in the next couple of years. We want to enjoy life and appreciate the best of what generations of culture and natural beauty can offer. Those are things that you will never find in america.	235	44	KxVbdGPAfjE	Beautiful China and traditional music	a595aa61cd29f207aec5220a100360ec	@point7lead	2010-10-20T03:06:37Z	0	en	0
anyone know what the name of this beautiful piece is?	anyone know what the name of this beautiful piece is?	53	10	KxVbdGPAfjE	Beautiful China and traditional music	76094f02c8606a2a5efc0aea9daf9dba	@alteredgenes1	2010-10-11T06:24:21Z	0	en	0
puto comunisto free china	puto comunisto free china	25	4	KxVbdGPAfjE	Beautiful China and traditional music	df1f1bb3da44617fde1361cd83e28791	@ovetusvetusta	2010-10-10T00:50:25Z	0	en	0
i love this wonderful sound of music.. it just takes my breathe away.. my heart is not with my body.. thankyou for sharing..	i love this wonderful sound of music.. it just takes my breathe away.. my heart is not with my body.. thankyou for sharing..	124	22	KxVbdGPAfjE	Beautiful China and traditional music	0f9e572fe5c3dbbcaf09caae3e26887b	@imaginationgurl	2010-10-03T11:36:18Z	0	en	0
China is great! I love the music... ^^	China is great! I love the music... ^^	38	6	KxVbdGPAfjE	Beautiful China and traditional music	17dc22684c7da28bd178eb7fa66d474e	@AlisYang	2010-10-03T08:28:37Z	0	en	0
@Sillyjake86 You're right. This is new age tradtional-Chinese styled music.	@Sillyjake86 You're right. This is new age tradtional-Chinese styled music.	75	13	KxVbdGPAfjE	Beautiful China and traditional music	db1decbd95e76123e54d834dfc1442c4	@wgh999	2010-10-02T19:56:08Z	0	en	0
@TheCakeIsALieGxG What a nice thing to say...bless you :)	@TheCakeIsALieGxG What a nice thing to say...bless you :)	57	8	KxVbdGPAfjE	Beautiful China and traditional music	e87cbf6e3c4b1d7ca773c6d19065bbd4	@wgh999	2010-09-30T19:04:47Z	0	en	0
Greetings from America! Very beautiful music, and very beautiful landscape/culture as well. May your country, it's culture, and it's people live long and prosperous lives! :)	Greetings from America! Very beautiful music, and very beautiful landscape/culture as well. May your country, it's culture, and it's people live long and prosperous lives! :)	174	26	KxVbdGPAfjE	Beautiful China and traditional music	da19c713eb512cb410026aa7b6de322e	@TheCakeIsALieGxG	2010-09-30T13:37:49Z	0	en	0
Like it very much!	Like it very much!	18	4	KxVbdGPAfjE	Beautiful China and traditional music	2c8643ca3f94ee0735de11c622a93c73	@taichigreentea	2010-09-29T01:46:00Z	0	en	0
greeting from india	greeting from india	19	3	KxVbdGPAfjE	Beautiful China and traditional music	6760a4285648d7fc186eab69534ec40e	@MultiRoger1987	2010-09-27T10:59:52Z	0	en	0
@TheBuddhaTv i love china-greetings from india; forever brothers thru history.... peace loving people of india and china-wud lov to visit someday	@TheBuddhaTv i love china-greetings from india; forever brothers thru history.... peace loving people of india and china-wud lov to visit someday	145	22	KxVbdGPAfjE	Beautiful China and traditional music	8d87d301e9174585993a1093c9374b0d	@anubhavsharmaice	2010-09-20T16:11:11Z	0	en	0
Soon.....this will be our backyard along with the hustle and bustle of the Big Cities.	Soon.....this will be our backyard along with the hustle and bustle of the Big Cities.	86	16	KxVbdGPAfjE	Beautiful China and traditional music	757daefef259141f4c197ba593771bb0	@surfshrimp	2010-09-18T13:10:46Z	0	en	0
Greetings from Romania	Greetings from Romania	22	3	KxVbdGPAfjE	Beautiful China and traditional music	6affddeb8832e977c1e6c212dadcd260	@beba967	2010-09-15T07:03:25Z	0	en	0
wait...did you get this from the Chinese News/weather channel?	wait...did you get this from the Chinese News/weather channel?	62	11	KxVbdGPAfjE	Beautiful China and traditional music	646dedc4584da9f2a09064d6b50e3d1e	@CalixGamin	2010-09-10T13:56:21Z	0	en	0
@blackdeckbox i agree and im from america	@blackdeckbox i agree and im from america	41	6	KxVbdGPAfjE	Beautiful China and traditional music	1d5e945a766187317e440b208eef0068	@CalixGamin	2010-09-10T13:55:24Z	0	en	0
@jeff19872011 Im not against American or anything, I like America too but it is NOT the most "free" country, the American media is biased.	@jeff19872011 Im not against American or anything, I like America too but it is NOT the most "free" country, the American media is biased.	138	24	KxVbdGPAfjE	Beautiful China and traditional music	f2ffdffe3a859e9a8208d6a797518b52	@blackdeckbox	2010-09-01T05:01:33Z	0	en	0
Looooong Live China....!!!! =D	Looooong Live China....!!!! =D	30	3	KxVbdGPAfjE	Beautiful China and traditional music	6a4bec263c263fe027a96a1151429ae0	@armyboy24	2010-08-22T07:45:12Z	0	en	0
@MRPACKISTANI1000 Squadala!	@MRPACKISTANI1000 Squadala!	27	3	KxVbdGPAfjE	Beautiful China and traditional music	c417939170663252281802b26c947e59	@lord123j	2010-08-21T01:26:55Z	0	en	0
Fantastically beautiful video !:))) 5 *)/ Bravo! Olga/	Fantastically beautiful video !:))) 5 *)/ Bravo! Olga/	54	5	KxVbdGPAfjE	Beautiful China and traditional music	45f7865c54c09c089be046b20f6544da	@Oliy92466	2010-08-20T20:32:40Z	0	en	0
China is very fantastic country. I hope I will have a chance to visit.	China is very fantastic country. I hope I will have a chance to visit.	70	11	KxVbdGPAfjE	Beautiful China and traditional music	83d8cf8cf516ba0c54ef66b892a8a7a2	@MrPenguin1979	2010-08-20T11:59:45Z	0	en	0
A beautiful and ancient culture has risen from the narrow minded, strict Maoist communism to a higher socialistic ideal that benefits all of Chinese society.	A beautiful and ancient culture has risen from the narrow minded, strict Maoist communism to a higher socialistic ideal that benefits all of Chinese society.	157	23	KxVbdGPAfjE	Beautiful China and traditional music	e5fd8436c679f446a01abf7004c1de22	@hillbillyvol	2010-08-17T22:22:18Z	0	en	0
stunning, thanks for sharing	stunning, thanks for sharing	28	4	KxVbdGPAfjE	Beautiful China and traditional music	1b6a4945ec849af18cd7af4c650117a4	@strollby4800	2010-08-07T15:33:54Z	0	en	0
@TheBuddhaTv thank you people	@TheBuddhaTv thank you people	29	4	KxVbdGPAfjE	Beautiful China and traditional music	12d2e456e288b49411db59ddc33dfa48	@happyface10101	2010-07-30T22:49:50Z	0	en	0
i have to go there one time in my life	i have to go there one time in my life	38	9	KxVbdGPAfjE	Beautiful China and traditional music	a1bccb8346bc316c11be718d201f431f	@MrCoooky	2010-07-20T20:49:20Z	0	en	0
@MrPAKISTAN10000 hello! I'm chinese and i dont smell like noodles. China is not all show. It really is beautiful there. lol yeah u must have been dumped by someone chinese	@MrPAKISTAN10000 hello! I'm chinese and i dont smell like noodles. China is not all show. It really is beautiful there. lol yeah u must have been dumped by someone chinese	171	28	KxVbdGPAfjE	Beautiful China and traditional music	4f733c20c5ea1d35c5476c3421a95f13	@violabug3	2010-07-15T21:48:41Z	0	en	0
Quanta pace!!!!!!!!!Bravo!!!!!!!!!!	Quanta pace!!!!!!!!!Bravo!!!!!!!!!!	35	3	KxVbdGPAfjE	Beautiful China and traditional music	69864666f20e07d7f5684f9594760088	@Tatyanapianista	2010-07-14T16:38:00Z	0	en	0
@reggieobster Well actually there was lots of war in china, especially during the fuedal era... Its only those really pious ones who practice these kinds of things	@reggieobster Well actually there was lots of war in china, especially during the fuedal era... Its only those really pious ones who practice these kinds of things	163	27	KxVbdGPAfjE	Beautiful China and traditional music	f1e26cb9c53f19f411154d5ae6ce8eae	@Exn3rvous	2010-07-13T13:25:49Z	0	en	0
China = beautiful people, landscapes, tradition, culture, etc........ China = Beautiful for me.	China = beautiful people, landscapes, tradition, culture, etc........ China = Beautiful for me.	95	11	KxVbdGPAfjE	Beautiful China and traditional music	15a942f62d43146416ed438d9a29d0ec	@khazardslover	2010-07-12T15:38:59Z	0	en	0
@dwizfiz I am not american but i do admire the dream of ur forefathers unfortunately, it's in the dumps already america is not a white country anymore, and soon white ppl won't even b the majority... (not that it matters, most of them r brainwashed anyway) so, u're sayin, 2700 yrs from now?! it won't b america so sad china IS great, but mayb it'll soon bcome too great for us to swallow...	@dwizfiz I am not american but i do admire the dream of ur forefathers unfortunately, it's in the dumps already america is not a white country anymore, and soon white ppl won't even b the majority... (not that it matters, most of them r brainwashed anyway) so, u're sayin, 2700 yrs from now?! it won't b america so sad china IS great, but mayb it'll soon bcome too great for us to swallow...	391	68	KxVbdGPAfjE	Beautiful China and traditional music	cf7d8a1924267a06ea3648fd77e215fd	@MrAbrek	2010-06-24T18:47:35Z	0	en	0
@dwizfiz iam canadien and i think just like you thak for this song and thank for your country	@dwizfiz iam canadien and i think just like you thak for this song and thank for your country	93	17	KxVbdGPAfjE	Beautiful China and traditional music	a5e9cbaaabad3aa96657cc4dae60acaa	@MathNakMuay	2010-06-23T21:13:55Z	0	en	0
@dwizfiz yea the reason american culture isn't as rich as other cultures is because america was only founded three hundered years ago and because america is pretty much a metling pot of races and cultures.	@dwizfiz yea the reason american culture isn't as rich as other cultures is because america was only founded three hundered years ago and because america is pretty much a metling pot of races and cultures.	205	34	KxVbdGPAfjE	Beautiful China and traditional music	f6b001f7f5cacda7efcc7f79f18d8f85	@Joshweitz	2010-06-22T17:52:54Z	0	en	0
Thank you for sharing this music.	Thank you for sharing this music.	33	6	KxVbdGPAfjE	Beautiful China and traditional music	197c7ffc8c27373466b7ac4b702de101	@nyonyagede	2010-06-11T04:03:25Z	0	en	0
hey guys anyone knw ware i can get that starting song on jay sean ft lil wayne rid it	hey guys anyone knw ware i can get that starting song on jay sean ft lil wayne rid it	85	18	KxVbdGPAfjE	Beautiful China and traditional music	3acd855b43445ababdbc8897b22c9f35	@webstar58	2010-06-01T05:09:03Z	0	en	0
so beautiful! omfg i wana come N see it for myself!	so beautiful! omfg i wana come N see it for myself!	51	9	KxVbdGPAfjE	Beautiful China and traditional music	730cd99731e5909adf2ca408257ccb54	@YukiShineonlyfe	2010-05-31T16:56:19Z	0	en	0
@frogprince1000 good call!	@frogprince1000 good call!	26	4	KxVbdGPAfjE	Beautiful China and traditional music	4219bcee3c7a68145f598bde2114f9ce	@Evaese	2010-05-17T14:09:45Z	0	en	0
@aixinjuelou513 you know what.....im just gunna quit this argument and agree to disagree. i guess i just LOOOOOVEEEE meat	@aixinjuelou513 you know what.....im just gunna quit this argument and agree to disagree. i guess i just LOOOOOVEEEE meat	121	19	KxVbdGPAfjE	Beautiful China and traditional music	9dee9d971debc911051179ce7e6a0cfd	@XxArkhamxAsylumxX	2010-05-12T04:06:33Z	0	en	0
@XxArkhamxAsylumxX I encourage u to join PETA to enhance your learning about nutrients.They have best expert tell food nutrients.Many famous vegetarians are well-known dietians they tell people how to eat correctly as vegan.U must prepare to accept your thinking might limited and open your narrow mind to new knowledge.	@XxArkhamxAsylumxX I encourage u to join PETA to enhance your learning about nutrients.They have best expert tell food nutrients.Many famous vegetarians are well-known dietians they tell people how to eat correctly as vegan.U must prepare to accept your thinking might limited and open your narrow mind to new knowledge.	320	50	KxVbdGPAfjE	Beautiful China and traditional music	81bf177bbf1fc2aa7d21b35f34155381	@aixinjuelou513	2010-05-12T04:02:26Z	0	en	0
@qinhan23 my point was that there is something called the fucking food pyramid. u cant just have one fucking pyramid filled with veggies, veggies, and some more veggies cuz then ulll be shitting urself soo bad u'll regret having eaten only veggies. The point is u need to either have some sort of meat substitute or sumthing cuz eating only leaves aint to healthy for ya.	@qinhan23 my point was that there is something called the fucking food pyramid. u cant just have one fucking pyramid filled with veggies, veggies, and some more veggies cuz then ulll be shitting urself soo bad u'll regret having eaten only veggies. The point is u need to either have some sort of meat substitute or sumthing cuz eating only leaves aint to healthy for ya.	371	65	KxVbdGPAfjE	Beautiful China and traditional music	f9d1b4206be3e9c7be4091a326e761c8	@XxArkhamxAsylumxX	2010-05-11T20:25:05Z	0	en	0
@XxArkhamxAsylumxX Famous Olympic Gold Medalist Carl Lewis is also Vegan.This kind of athlete are surrounded by dietian.Don ever think u know better than them.	@XxArkhamxAsylumxX Famous Olympic Gold Medalist Carl Lewis is also Vegan.This kind of athlete are surrounded by dietian.Don ever think u know better than them.	159	25	KxVbdGPAfjE	Beautiful China and traditional music	a69014174beea72e3f435117fbbb0888	@qinhan23	2010-05-11T11:46:46Z	0	en	0
@XxArkhamxAsylumxX Please check your facts correctly.Log on PETA to find correct information before talking rubbish.Let me tell you this: Gandhi the Father of India, Mark Twain the writer OF the American, Martina The World Tennis Champion, Hitler The Germany Chancellor. Albert Eistein Nobel Prize Winner in Physics. These are vegetarians n do think u know better than them about nutrients? There ar…	@XxArkhamxAsylumxX Please check your facts correctly.Log on PETA to find correct information before talking rubbish.Let me tell you this: Gandhi the Father of India, Mark Twain the writer OF the American, Martina The World Tennis Champion, Hitler The Germany Chancellor. Albert Eistein Nobel Prize Winner in Physics. These are vegetarians n do think u know better than them about nutrients? There ar…	479	74	KxVbdGPAfjE	Beautiful China and traditional music	3737897e35f81dac8ca2cb02046672c5	@qinhan23	2010-05-11T11:42:02Z	0	en	0
@qinhan23 but our bodies are not designed to digest cellulose therefore going vegan is extremely unhealthy for you.......	@qinhan23 but our bodies are not designed to digest cellulose therefore going vegan is extremely unhealthy for you.......	121	19	KxVbdGPAfjE	Beautiful China and traditional music	b2e767534bcb10de8dae98e38c5ed2c1	@XxArkhamxAsylumxX	2010-05-10T21:28:52Z	0	en	0
@XxArkhamxAsylumxX Meat is acidic.Going vegan is good for u and the world environment.U still have stone age mentality.	@XxArkhamxAsylumxX Meat is acidic.Going vegan is good for u and the world environment.U still have stone age mentality.	119	18	KxVbdGPAfjE	Beautiful China and traditional music	272d05206b939efa34e4077d5f52c914	@qinhan23	2010-05-10T11:24:57Z	0	en	0
@qinhan23 ya and in the first chapter of the Bible it says God made the fricken world. pssh i think we figured out whats best for us just as the chinese did. i'd rather not have major diarrhea every day from eating crap i cant even digest ty	@qinhan23 ya and in the first chapter of the Bible it says God made the fricken world. pssh i think we figured out whats best for us just as the chinese did. i'd rather not have major diarrhea every day from eating crap i cant even digest ty	241	46	KxVbdGPAfjE	Beautiful China and traditional music	c6dc409f25f883f7ca722506ec632566	@XxArkhamxAsylumxX	2010-05-09T17:01:00Z	0	en	0
@XxArkhamxAsylumxX In the first chapter chinese scriptures Yi Ching(I ching)encourage human to go vegan.Great Emperor like Yong Zhen is Vegetarian.Many great scholar like Lao Tzi also vegetarian.	@XxArkhamxAsylumxX In the first chapter chinese scriptures Yi Ching(I ching)encourage human to go vegan.Great Emperor like Yong Zhen is Vegetarian.Many great scholar like Lao Tzi also vegetarian.	195	30	KxVbdGPAfjE	Beautiful China and traditional music	af25b08cdcab709d9827272928db6184	@qinhan23	2010-05-09T16:56:28Z	0	en	0
@varunb82 technically we used to eat any domesticated animals and we still do(pigs, chicken, etc.) so u have to be open-minded and realize that this is part of China's culure and it has been for centuries. We ourselves put our own moral standards on things and it is our choice to follow them or not.	@varunb82 technically we used to eat any domesticated animals and we still do(pigs, chicken, etc.) so u have to be open-minded and realize that this is part of China's culure and it has been for centuries. We ourselves put our own moral standards on things and it is our choice to follow them or not.	300	57	KxVbdGPAfjE	Beautiful China and traditional music	ec934d68492c733de15e1322c1a9dabe	@XxArkhamxAsylumxX	2010-05-07T05:41:55Z	0	en	0
@KellyRuleszzzz freedom of speech. great joke	@KellyRuleszzzz freedom of speech. great joke	45	6	KxVbdGPAfjE	Beautiful China and traditional music	9928ec0188a0b4caaa2ebec2b31ccbff	@tonaldo0815	2010-05-03T06:20:46Z	0	en	0
American heritage is German/Italian/Irish/English/French/Spanish/Mexican/NativeAmerican/Chinese/Japanese/etcetcetcetcetc. Heritage, I'm glad I'm from a country where we can be proud of everything.	American heritage is German/Italian/Irish/English/French/Spanish/Mexican/NativeAmerican/Chinese/Japanese/etcetcetcetcetc. Heritage, I'm glad I'm from a country where we can be proud of everything.	196	25	KxVbdGPAfjE	Beautiful China and traditional music	8bfba4213efc7c81f20ce812923509be	@Orhan6125	2010-04-28T23:21:15Z	0	en	0
china's beutiful but chinese communizm sucks	china's beutiful but chinese communizm sucks	44	6	KxVbdGPAfjE	Beautiful China and traditional music	db1cb4a7d496f0011e4ae818a09f97da	@nosorog91	2010-04-28T12:28:47Z	0	en	0
Un-explainingly beautiful!!!!	Un-explainingly beautiful!!!!	29	3	KxVbdGPAfjE	Beautiful China and traditional music	c8f1e7480ef9f1cabdf8d5d0af3d8f7d	@thesoraj	2010-04-16T16:41:38Z	0	en	0
i agree it has some western.. its still lovely though..	i agree it has some western.. its still lovely though..	55	9	KxVbdGPAfjE	Beautiful China and traditional music	4efeda30ed123c1266d3072026e424f9	@EmpressChocolateFox	2010-03-31T16:21:23Z	0	en	0
yeah that is wa the old china but know there are supermarkets and machines no beauty anymore	yeah that is wa the old china but know there are supermarkets and machines no beauty anymore	92	17	KxVbdGPAfjE	Beautiful China and traditional music	606490bc63f84568fe813782b344055e	@sexy11024	2010-03-29T11:10:18Z	0	en	0
Nice landscapes, great culture... Watch my video about some of the natural landscapes of Argentina!!! Greetings to all the chinese peopleeeeee!!! that means lot of greetings lol	Nice landscapes, great culture... Watch my video about some of the natural landscapes of Argentina!!! Greetings to all the chinese peopleeeeee!!! that means lot of greetings lol	177	27	KxVbdGPAfjE	Beautiful China and traditional music	4b0d5ea4f096d1553edbb1e362448b2f	@DelSolNacido	2010-03-09T19:56:34Z	0	en	0
I would dream myself with a sword on my back roaming in the beautiful and serene wild and probing the peace and serenity in my heart as many traditional literature novels depicted Haha, laugh at me	I would dream myself with a sword on my back roaming in the beautiful and serene wild and probing the peace and serenity in my heart as many traditional literature novels depicted Haha, laugh at me	197	34	KxVbdGPAfjE	Beautiful China and traditional music	f1cd6f57bbaa92001f1c4ed8bef1cd02	@frogprince1000	2010-03-05T08:22:31Z	0	en	1
Missing the good times! Miss my love!!	Missing the good times! Miss my love!!	38	7	KxVbdGPAfjE	Beautiful China and traditional music	936962ec83e36f7faa7cbe50beeb20f9	@yndalicia	2010-02-27T00:31:09Z	0	en	0
Obviously, sarcasm doesn't always travel over the web as easily as we would like it. Welcome to the limits of txt.	Obviously, sarcasm doesn't always travel over the web as easily as we would like it. Welcome to the limits of txt.	114	21	KxVbdGPAfjE	Beautiful China and traditional music	402e89da13c7dbff70b58e4b65011fba	@pastageek2	2010-02-24T01:11:36Z	0	en	0
I do agree with you there. Illegal immigration is no good whatsoever. I think that drugs should be cracked down on.	I do agree with you there. Illegal immigration is no good whatsoever. I think that drugs should be cracked down on.	115	19	KxVbdGPAfjE	Beautiful China and traditional music	44fbb2a6b49cc44c1de3f3dbe3600c30	@pastageek2	2010-02-24T01:09:56Z	0	en	0
You should ask him, not me, even if the question is rhetorical.	You should ask him, not me, even if the question is rhetorical.	63	12	KxVbdGPAfjE	Beautiful China and traditional music	563e2962b78ad239a3ea34b825439946	@pastageek2	2010-02-24T01:08:34Z	0	en	0
You really are stupid; I'm not going to mince words here. Some people grow up without freedom not because of their actions, but because of their country's leader's actions. Freedom never came easy, so I don't know what you are on about. Since apparently the only way you can get entertainment is by hurting others, you are the screw up. You are the embarrassment to whites and to all humanity as a w…	You really are stupid; I'm not going to mince words here. Some people grow up without freedom not because of their actions, but because of their country's leader's actions. Freedom never came easy, so I don't know what you are on about. Since apparently the only way you can get entertainment is by hurting others, you are the screw up. You are the embarrassment to whites and to all humanity as a w…	475	84	KxVbdGPAfjE	Beautiful China and traditional music	71ef93d2f6ea22287831339f17c0d490	@pastageek2	2010-02-23T14:24:34Z	0	en	0
Don't forget he got pwned in the end, and now he's the joke. And that was my point. When you gang up on people you show your cowardice and lack of ability to actually fight. And it really doesn't matter if you are a teenager or not; you are responsible for your actions. Also, if there are asians doing that to whites, then the actual perpetrators of the crime are the one's in need of punishment, n…	Don't forget he got pwned in the end, and now he's the joke. And that was my point. When you gang up on people you show your cowardice and lack of ability to actually fight. And it really doesn't matter if you are a teenager or not; you are responsible for your actions. Also, if there are asians doing that to whites, then the actual perpetrators of the crime are the one's in need of punishment, n…	480	89	KxVbdGPAfjE	Beautiful China and traditional music	b319821b4ba79ab5b9d6a1ab45516409	@pastageek2	2010-02-23T14:19:55Z	0	en	0
Why are you people feeding the troll? Please do not feed the troll. It just encourages him to fill up the comments pages with junk. Don't let him waste your time. Just enjoy the video.	Why are you people feeding the troll? Please do not feed the troll. It just encourages him to fill up the comments pages with junk. Don't let him waste your time. Just enjoy the video.	184	35	KxVbdGPAfjE	Beautiful China and traditional music	995dd348bf2981eb3ea6f4963d3f1a3f	@andrewshere	2010-02-21T13:08:06Z	0	en	0
History is useless to none, and those who don't learn from it repeat it and you are doomed to repeated it I see and hurt others in the process. The fact that you have to gang up on ppl says you are spineless. I guess you are afraid to take on one yourself for fear of getting pwned by martial arts. You are also a hypocrite for enjoying freedoms that you don't want others to have, and I say this a …	History is useless to none, and those who don't learn from it repeat it and you are doomed to repeated it I see and hurt others in the process. The fact that you have to gang up on ppl says you are spineless. I guess you are afraid to take on one yourself for fear of getting pwned by martial arts. You are also a hypocrite for enjoying freedoms that you don't want others to have, and I say this a …	500	93	KxVbdGPAfjE	Beautiful China and traditional music	239e1fea1636417bddb688b3f13c04ff	@pastageek2	2010-02-21T12:52:07Z	0	en	0
There is a single world to describe that, and I will put it in all caps since shouting is at this time appropriate, HYPOCRITE If Africa is such a nice place to live, then go there and put your USD where your mouth is.	There is a single world to describe that, and I will put it in all caps since shouting is at this time appropriate, HYPOCRITE If Africa is such a nice place to live, then go there and put your USD where your mouth is.	217	41	KxVbdGPAfjE	Beautiful China and traditional music	8bb600b4a47d4535d79482fae2a5d062	@pastageek2	2010-02-20T13:17:59Z	0	en	0
@JaymsCallahan, I bet you wouldn't think it's so funny if you got a taste of your own medicine. You like LechnefJeik27 are the ones who take freedoms for granted. You really need to grow up.	@JaymsCallahan, I bet you wouldn't think it's so funny if you got a taste of your own medicine. You like LechnefJeik27 are the ones who take freedoms for granted. You really need to grow up.	190	34	KxVbdGPAfjE	Beautiful China and traditional music	57668b7a6ad5fad26dfde4534210af1d	@pastageek2	2010-02-20T13:14:14Z	0	en	0
According to my Chinese wife, the flute is an very old type "xiao" made of bamboo.	According to my Chinese wife, the flute is an very old type "xiao" made of bamboo.	82	16	KxVbdGPAfjE	Beautiful China and traditional music	66d32d81f8f6bab85280866bee9b803f	@kjelleman1957	2010-02-14T10:06:39Z	0	en	0
@eseaidea, you aren't helping. stop being so gay with the f word and focus on the problem of racism here. This really is one of the worst problems with ppl these days! Instead of trying to solve one problem, they start being gay about other things. Try getting your mind out of the gutter and seeming less like a pig.	@eseaidea, you aren't helping. stop being so gay with the f word and focus on the problem of racism here. This really is one of the worst problems with ppl these days! Instead of trying to solve one problem, they start being gay about other things. Try getting your mind out of the gutter and seeming less like a pig.	317	58	KxVbdGPAfjE	Beautiful China and traditional music	21cbebd42fefcefc385b39c2ce409b4f	@pastageek2	2010-02-10T13:12:56Z	0	en	0
My apolgies I just read the whole thing. keep up the good work!	My apolgies I just read the whole thing. keep up the good work!	63	12	KxVbdGPAfjE	Beautiful China and traditional music	a2f708b48ebea9e979bf3df51f6ea630	@SoybeanVideo	2010-02-04T08:21:18Z	0	en	0
@soybeanVideo, not sure why you are telling us both so shut up and not just jayms as I'm arguing against racism. And considering China is a very religious place, don't really know why you are whining about religion.	@soybeanVideo, not sure why you are telling us both so shut up and not just jayms as I'm arguing against racism. And considering China is a very religious place, don't really know why you are whining about religion.	215	36	KxVbdGPAfjE	Beautiful China and traditional music	12c38c581d0b93e89b250177cb112dca	@pastageek2	2010-02-03T23:30:07Z	0	en	0
@jaymscallahan Once again, you open your big trap (or keyboard rather) and say something uncalled for. Why are you even listing to chinese music if you think it is made by inferior ppl? You still have offered no proof or any place to look for proof of you idea, so you epic fail. You have just been pwnd!	@jaymscallahan Once again, you open your big trap (or keyboard rather) and say something uncalled for. Why are you even listing to chinese music if you think it is made by inferior ppl? You still have offered no proof or any place to look for proof of you idea, so you epic fail. You have just been pwnd!	304	58	KxVbdGPAfjE	Beautiful China and traditional music	e6dbc5c132ff0125bf84a35b63c6035b	@pastageek2	2010-02-03T23:27:32Z	0	en	0
shut up guys this video does not include comment arguing/racist shit nor does include religion. CMON GUYS ITS LANDSCAPE AND BEAUTIFUL MUSIC CHILL AHHA	shut up guys this video does not include comment arguing/racist shit nor does include religion. CMON GUYS ITS LANDSCAPE AND BEAUTIFUL MUSIC CHILL AHHA	150	25	KxVbdGPAfjE	Beautiful China and traditional music	533eb9f92b45a3e5bc7d8a0a40cf0bfa	@SoybeanVideo	2010-02-03T09:14:29Z	0	en	0
There is much need to defend people from the likes of you, because you are in fact as they say in Germany ein swinehunt. And it really doesn't matter who I date; I'm against racism. They have human emotions just like whites do and thus have rights. You really don't belong in a country with as much ethnic diversity as USA. And you still have yet to give me a sound logical argument. I'm waiting for…	There is much need to defend people from the likes of you, because you are in fact as they say in Germany ein swinehunt. And it really doesn't matter who I date; I'm against racism. They have human emotions just like whites do and thus have rights. You really don't belong in a country with as much ethnic diversity as USA. And you still have yet to give me a sound logical argument. I'm waiting for…	492	88	KxVbdGPAfjE	Beautiful China and traditional music	53cfad12bb7b08a3bb03c077932d8217	@pastageek2	2010-02-01T13:04:30Z	0	en	0
Don't make excuses based on my beliefs. It doesn't matter who you argue with, you still need to make a concrete argument without fallacies and falsehoods. Since you can't, you turn to mocking me. You aren't fooling anyone and if you don't follow his teachings or at least attempt to as a saved person, then you really don't respect Jesus. No racist could ever respect Jesus or his deeds as he reache…	Don't make excuses based on my beliefs. It doesn't matter who you argue with, you still need to make a concrete argument without fallacies and falsehoods. Since you can't, you turn to mocking me. You aren't fooling anyone and if you don't follow his teachings or at least attempt to as a saved person, then you really don't respect Jesus. No racist could ever respect Jesus or his deeds as he reache…	492	85	KxVbdGPAfjE	Beautiful China and traditional music	32376654cba3cfdab431cb6afc72f926	@pastageek2	2010-02-01T12:58:08Z	0	en	0
Considering I'm going for a Chem and Physics dual degree and I also happen to know how to program, I really don't see how you can come off calling me an idiot since I've shown your mental flaws time and again and you haven't shown anything concrete wrong withe me. Here's another flaw you made, you say you have respect for Jesus, but Israel happens to be part of Asia. He also backs up the authorit…	Considering I'm going for a Chem and Physics dual degree and I also happen to know how to program, I really don't see how you can come off calling me an idiot since I've shown your mental flaws time and again and you haven't shown anything concrete wrong withe me. Here's another flaw you made, you say you have respect for Jesus, but Israel happens to be part of Asia. He also backs up the authorit…	499	89	KxVbdGPAfjE	Beautiful China and traditional music	7c15dff2b1328fcd8d0b8ba797f6a63b	@pastageek2	2010-01-31T14:37:05Z	0	en	0
I know lots of whites that aren't good at math including my mom. No I'm not happy since you still proceed in the illogical thinking that we whites are the only ones that are human. And you call me a tard yet you can't even get plurality or lack thereof correct. You use plural on deity, but as a Baptist I'm a monotheist. Why do you have a superiority complex? If you open up, there are people like …	I know lots of whites that aren't good at math including my mom. No I'm not happy since you still proceed in the illogical thinking that we whites are the only ones that are human. And you call me a tard yet you can't even get plurality or lack thereof correct. You use plural on deity, but as a Baptist I'm a monotheist. Why do you have a superiority complex? If you open up, there are people like …	431	78	KxVbdGPAfjE	Beautiful China and traditional music	6643a8e69254e6e32329316412b1d0df	@pastageek2	2010-01-30T00:14:14Z	0	en	0
A disagreement over deity has nothing to do with race. That wasn't a very intelligent statement you made to equivocate them, so quite accusing me of lower intelligence. You also apparently don't grasp the concept of aptitude otherwise you wouldn't say that anyone could be good at math. And assuming your profile picture is actually you, yes the irony still stands you look like anime. Just saying. …	A disagreement over deity has nothing to do with race. That wasn't a very intelligent statement you made to equivocate them, so quite accusing me of lower intelligence. You also apparently don't grasp the concept of aptitude otherwise you wouldn't say that anyone could be good at math. And assuming your profile picture is actually you, yes the irony still stands you look like anime. Just saying. …	488	82	KxVbdGPAfjE	Beautiful China and traditional music	5248e661c9fdf582f7e9268902c2d956	@pastageek2	2010-01-29T12:35:41Z	0	en	0
It has nothing to do with being shunned and everything to do with belief system. I'm Christian and there's no two ways about it, there is no room for racism in Christianity no matter what your ethnicity. I felt the need to defend them out of pure logic. You are illogical and therefore must be corrected. On a side note, how ironic that you look a bit like an anime character. muahahaha In other new…	It has nothing to do with being shunned and everything to do with belief system. I'm Christian and there's no two ways about it, there is no room for racism in Christianity no matter what your ethnicity. I felt the need to defend them out of pure logic. You are illogical and therefore must be corrected. On a side note, how ironic that you look a bit like an anime character. muahahaha In other new…	470	82	KxVbdGPAfjE	Beautiful China and traditional music	2eb24f548bd877ffcc839539f03f9c4a	@pastageek2	2010-01-28T14:07:04Z	0	en	0
What I will say is that based on your comments and profile you lack maturity in the extreme. You need some growing up to do, even for a 19 year old. I had twice as much maturity when I was half you age.	What I will say is that based on your comments and profile you lack maturity in the extreme. You need some growing up to do, even for a 19 year old. I had twice as much maturity when I was half you age.	202	39	KxVbdGPAfjE	Beautiful China and traditional music	c3dd61b1353498b328d291af6bd18704	@pastageek2	2010-01-26T16:03:24Z	0	en	0
Neither. I'm in fact going for a bachelors in Chemistry and Physics and my heritage is European. What I am is a sinner saved by grace and as a very Orthodox Baptist, I consider Asians humans as they came from Noah just as did those of African and European descent. You are just a racist trying to call others foolish. Your profile says that you are from the US. Going to assume you didn't lie, and t…	Neither. I'm in fact going for a bachelors in Chemistry and Physics and my heritage is European. What I am is a sinner saved by grace and as a very Orthodox Baptist, I consider Asians humans as they came from Noah just as did those of African and European descent. You are just a racist trying to call others foolish. Your profile says that you are from the US. Going to assume you didn't lie, and t…	493	88	KxVbdGPAfjE	Beautiful China and traditional music	74ff6760540d5222e07ee2dfa6f2c238	@pastageek2	2010-01-26T16:00:02Z	0	en	0
Oh I guess the reply link I clicked on for JaymsCallahan brought me to another JaymsCallahan. Oh wait, aren't usernames unique? And yes you did call some human beings inferior, unless you are trying to tell me that Asians aren't humans. But I assure you they are. Do you not like see the post you put calling them inferior? Do you post so much h8 that you can't even remember it? Well its pretty obv…	Oh I guess the reply link I clicked on for JaymsCallahan brought me to another JaymsCallahan. Oh wait, aren't usernames unique? And yes you did call some human beings inferior, unless you are trying to tell me that Asians aren't humans. But I assure you they are. Do you not like see the post you put calling them inferior? Do you post so much h8 that you can't even remember it? Well its pretty obv…	486	84	KxVbdGPAfjE	Beautiful China and traditional music	993ddf8254b716626d29a5adfd5d0aed	@pastageek2	2010-01-26T15:37:58Z	0	en	0
How dare you call another human being inferior. You evolutionists think you're so much more evolved than everybody, but you have another thing coming.	How dare you call another human being inferior. You evolutionists think you're so much more evolved than everybody, but you have another thing coming.	150	25	KxVbdGPAfjE	Beautiful China and traditional music	ed91ba79b41552a56bf1f6c7988c9575	@pastageek2	2010-01-25T02:43:06Z	0	en	0
HEY THAt sounds in the game "perfect world"	HEY THAt sounds in the game "perfect world"	43	8	KxVbdGPAfjE	Beautiful China and traditional music	e310a43631dce8744ed472af3b8bce9c	@mabisuatar	2010-01-18T19:46:24Z	0	en	0
u need money for everything and everywhere less ur a hermit which would be awesome	u need money for everything and everywhere less ur a hermit which would be awesome	82	13	KxVbdGPAfjE	Beautiful China and traditional music	8f0284398a7fa93d20adfe6aec46a247	@RazlerofEsthar	2010-01-06T23:48:03Z	0	en	0
i have an urge to climb those mountains looks beautiful though i have a feeling id never make it to the top	i have an urge to climb those mountains looks beautiful though i have a feeling id never make it to the top	107	19	KxVbdGPAfjE	Beautiful China and traditional music	d09bf2d141f7123d3104b77b2dc11df2	@RazlerofEsthar	2010-01-06T23:44:04Z	0	en	0
LeThoem, I've always thought it dangerous when people make statements along the lines of "If you love...then you must also love..." You're either with us or against us (Georg W. Bush)... If you love your country then you will agree to this...If you love your country then you will not criticize...you are not patriotic if you disagree with us... It's ironic how similar the Far Left's rhetoric is to…	LeThoem, I've always thought it dangerous when people make statements along the lines of "If you love...then you must also love..." You're either with us or against us (Georg W. Bush)... If you love your country then you will agree to this...If you love your country then you will not criticize...you are not patriotic if you disagree with us... It's ironic how similar the Far Left's rhetoric is to…	436	78	KxVbdGPAfjE	Beautiful China and traditional music	bf0b04b98f04ab4155eda7faf322e882	@andrewshere	2009-12-25T03:58:07Z	0	en	0
We (the British) started Capitalism, I'm sorry to say. It can't last forever. One day we will need a new system.	We (the British) started Capitalism, I'm sorry to say. It can't last forever. One day we will need a new system.	112	19	KxVbdGPAfjE	Beautiful China and traditional music	f0f2f61f9afe494a9973ed4e01a9af93	@mahler71	2009-12-24T12:55:26Z	0	en	0
Beautiful music. So soothing. Thanks for posting.	Beautiful music. So soothing. Thanks for posting.	49	7	KxVbdGPAfjE	Beautiful China and traditional music	1ee0536ae069a5104b9ed3cbc2e9544f	@goov47	2009-12-23T16:52:24Z	0	en	0
i have much respect for china... i love you guys.	i have much respect for china... i love you guys.	49	8	KxVbdGPAfjE	Beautiful China and traditional music	609f9b2fc86ac63abd3b9725a039a914	@romansoldierofhonor	2009-12-19T09:44:48Z	0	en	0
am i allowed to love it unconditionally?:)	am i allowed to love it unconditionally?:)	42	6	KxVbdGPAfjE	Beautiful China and traditional music	2f88788a7de01d9542c0f13b827e4d53	@secretchordstudio	2009-12-10T09:38:27Z	0	en	0
i love the world!	i love the world!	17	3	KxVbdGPAfjE	Beautiful China and traditional music	f46e5c8224952805f940f5efa4d9a8c5	@initdialog	2009-11-30T12:46:52Z	0	en	0
Hujintaomustresign probably is the most energetic speaker here on this sharing, but it seems he talks more about political issue than MUSIC. Why don't we just comment on the music and landscape and get rid of POLITICS? Music is innocent, so don't degrace it!!!	Hujintaomustresign probably is the most energetic speaker here on this sharing, but it seems he talks more about political issue than MUSIC. Why don't we just comment on the music and landscape and get rid of POLITICS? Music is innocent, so don't degrace it!!!	260	44	KxVbdGPAfjE	Beautiful China and traditional music	9ec562941b669cc5e57bef3c837fa619	@frogprince1000	2009-11-20T03:24:54Z	0	en	0
The land is beautiful, the culture is amazing, the people are cool, the government however SUCKS!	The land is beautiful, the culture is amazing, the people are cool, the government however SUCKS!	97	16	KxVbdGPAfjE	Beautiful China and traditional music	8a05af79b8ad5c1e11fe1d5e48891217	@fsxlover	2009-11-12T00:05:46Z	0	en	0
got Somerly nice forests there hope u take here of them ^.^	got Somerly nice forests there hope u take here of them ^.^	59	10	KxVbdGPAfjE	Beautiful China and traditional music	f524de74a8836ce701853eedf13b1ce2	@wastedartist	2009-10-16T02:56:30Z	0	en	0
is that how chinese look lkie?	1:40 is that how chinese look lkie?	30	6	KxVbdGPAfjE	Beautiful China and traditional music	c0d1f2bf5fa88201f7bd3025d5375c71	@supermonk3y07	2009-10-12T02:59:00Z	0	en	0
i have this channal at home	i have this channal at home	27	5	KxVbdGPAfjE	Beautiful China and traditional music	265d9383abfbaaf4b1fcdc0dd38efa77	@kanatapaw	2009-09-29T16:58:31Z	0	en	0
NorthStarAritharo, your comment is profound, though I'm not sure I'd agree with the 'Chinese need to know this more than many' bit - I would think DR Congo, Burma, North Korea, Afghanistan, Iraq and Somalia would be higher on that list. I don't disagree that China needs to improve but at least it's not imploding like the Soviet Union or Yugoslavia. That really would be a mess.	NorthStarAritharo, your comment is profound, though I'm not sure I'd agree with the 'Chinese need to know this more than many' bit - I would think DR Congo, Burma, North Korea, Afghanistan, Iraq and Somalia would be higher on that list. I don't disagree that China needs to improve but at least it's not imploding like the Soviet Union or Yugoslavia. That really would be a mess.	379	61	KxVbdGPAfjE	Beautiful China and traditional music	00a0ccc38352930422e17a9e73fc0d82	@andrewshere	2009-09-21T10:35:44Z	0	en	0
Oh really, you're smart mate.	Oh really, you're smart mate.	29	6	KxVbdGPAfjE	Beautiful China and traditional music	2cee20d1f962db7a3dadd590f5abb403	@daper08	2009-08-24T06:39:23Z	0	en	0
China Is Indeed Beautiful!!! I'm Very Proud To Be Chinese!!!!	China Is Indeed Beautiful!!! I'm Very Proud To Be Chinese!!!!	61	9	KxVbdGPAfjE	Beautiful China and traditional music	fba879dc9df93a20ed65ddcfec3b42da	@dragonnetx	2009-08-23T10:01:51Z	0	en	0
hahaha that was good	hahaha that was good	20	4	KxVbdGPAfjE	Beautiful China and traditional music	ded57a5e3f22f25a44d0d8ec5478a60c	@Blazinfistsoffury	2009-08-19T05:07:11Z	0	en	0
being nice mean appreciated alot	being nice mean appreciated alot	32	5	KxVbdGPAfjE	Beautiful China and traditional music	4916d9a2ea080428dfd53b977191b6e8	@j3r3mzkull	2009-08-12T17:19:26Z	0	en	0
ive never seen a a better video and music then this its perfect thannks planettiger	ive never seen a a better video and music then this its perfect thannks planettiger	83	13	KxVbdGPAfjE	Beautiful China and traditional music	8ce7160d9dfba14692a14f43fefa6d8a	@gefftom	2009-08-05T20:10:34Z	0	en	0
Yeah but imo its nothing compared to this.	Yeah but imo its nothing compared to this.	42	8	KxVbdGPAfjE	Beautiful China and traditional music	b3b22e8602430f9ca5f50d98d75efbdf	@LibertyPrimeV1	2009-07-26T21:20:29Z	0	en	0
Dude, have you ever left the city? Head out to Oregon, Idaho, Alaska, Washington and the other western states and you will see natural wonders that rival these sights.	Dude, have you ever left the city? Head out to Oregon, Idaho, Alaska, Washington and the other western states and you will see natural wonders that rival these sights.	167	29	KxVbdGPAfjE	Beautiful China and traditional music	883adff457171d766e09bf2a823c989f	@Linkster2o	2009-07-26T21:00:58Z	0	en	0
It might look amazing on video...but in real life...it's unbelievable ( well compared to how America us, nature wise )	It might look amazing on video...but in real life...it's unbelievable ( well compared to how America us, nature wise )	118	20	KxVbdGPAfjE	Beautiful China and traditional music	4a4337e2b0d86c35995c0d3a9d70e9eb	@LibertyPrimeV1	2009-07-25T09:18:50Z	0	en	0
i am in china ,i can get to youtube,but you should find some way.you can see so many chinese in youtube.	i am in china ,i can get to youtube,but you should find some way.you can see so many chinese in youtube.	104	21	KxVbdGPAfjE	Beautiful China and traditional music	001d4a8974bfae286884a63956dd67b6	@gaoxuef	2009-07-25T04:50:00Z	0	en	0
The scenery captured my heart!	The scenery captured my heart!	30	5	KxVbdGPAfjE	Beautiful China and traditional music	99ca8b8ec1a7713f2de5e9ab406e8b82	@FakirsCA	2009-07-18T17:07:20Z	0	en	0
Cant read it but it looks beautiful 8) Greetings from Germany	Cant read it but it looks beautiful 8) Greetings from Germany	61	10	KxVbdGPAfjE	Beautiful China and traditional music	1368f2240f2d976c3c5ae01d16f9a607	@KnorpelDelux	2009-07-15T18:01:54Z	0	en	0
well.u wont miss nothing. this channel sucks..trust me..things like that are on once a year..in other times, its just idiot..chinese ppl's doing rly idiot and nasty things ..thats it..cctv xD	well.u wont miss nothing. this channel sucks..trust me..things like that are on once a year..in other times, its just idiot..chinese ppl's doing rly idiot and nasty things ..thats it..cctv xD	191	34	KxVbdGPAfjE	Beautiful China and traditional music	52f5973d8ee73f331639448d8be605d7	@TheSpyChecker	2009-07-10T11:15:14Z	0	en	0
Beautiful and calming...	Beautiful and calming...	24	3	KxVbdGPAfjE	Beautiful China and traditional music	ea38b5bbb143b0b81ecafa32733ea3e1	@anastasius6	2009-07-02T08:38:51Z	0	en	0
i love the music	i love the music	16	3	KxVbdGPAfjE	Beautiful China and traditional music	363ca8fd93f06c6551914057b4deaed6	@smacdallas	2009-06-29T03:23:10Z	0	en	0
i visited rural china, it wasvery relaxing and calming, its no wonder its the land of the wise i advise people to stay away from the cities, not only are they toxic they are not very pleasent places	i visited rural china, it wasvery relaxing and calming, its no wonder its the land of the wise i advise people to stay away from the cities, not only are they toxic they are not very pleasent places	198	36	KxVbdGPAfjE	Beautiful China and traditional music	17735b3df52715f9667bcb96379a59c1	@Zets112	2009-06-27T21:40:15Z	0	en	0
Protoss are awesome!	Protoss are awesome!	20	3	KxVbdGPAfjE	Beautiful China and traditional music	070355895552565d51ce7b72488d16a8	@thomas7250	2009-06-25T18:02:05Z	0	en	0
I want to visit China now....	I want to visit China now....	29	5	KxVbdGPAfjE	Beautiful China and traditional music	5384c8d420139c6021ca30c8d095d5b9	@kepochi2009	2009-06-21T09:35:50Z	0	en	0
absolutely should make the trip. travel off season (not summer months) is very reasonable and once you are there it's not expensive at all. People are incredibly friendly and gracious. Can't wait for my next trip.	absolutely should make the trip. travel off season (not summer months) is very reasonable and once you are there it's not expensive at all. People are incredibly friendly and gracious. Can't wait for my next trip.	213	36	KxVbdGPAfjE	Beautiful China and traditional music	f0f00791b9f831baae60b4a2cc555367	@bkmeahan	2009-06-15T18:49:16Z	0	en	0
Beautiful China and traditional music	Beautiful China and traditional music	37	5	KxVbdGPAfjE	Beautiful China and traditional music	feb997a832e18b92a4277713bb9baf6a	@akpcSAIN	2009-06-14T04:54:48Z	0	en	0
TIBEt IS ALSO VERY BEAUTIFUL...ALSO GO TO LOOK OVER THERE! ONE LOVE!	TIBEt IS ALSO VERY BEAUTIFUL...ALSO GO TO LOOK OVER THERE! ONE LOVE!	68	13	KxVbdGPAfjE	Beautiful China and traditional music	4077cfdc8fb1aaee93a27e17993ab1c3	@SiouxSyndicate	2009-06-09T15:55:18Z	0	en	0
Beautiful and peacefull....have a listen to my Eurovision 2009 entry for Ireland its on my site....leave a comment if you can....	Beautiful and peacefull....have a listen to my Eurovision 2009 entry for Ireland its on my site....leave a comment if you can....	129	21	KxVbdGPAfjE	Beautiful China and traditional music	cd8dc6dcd05b3e631a9dff8d14779ba3	@DavidLyons7	2009-05-27T21:08:04Z	0	en	0
Amazing sites, amazing tune. much love from Israel :)	Amazing sites, amazing tune. much love from Israel :)	53	8	KxVbdGPAfjE	Beautiful China and traditional music	f52baf150da3c8a232fc16286e687bed	@DorTheCore	2009-05-27T00:36:33Z	0	en	0
this is really stupid.... Korean start to rewrite their history after the Korean war...	this is really stupid.... Korean start to rewrite their history after the Korean war...	87	14	KxVbdGPAfjE	Beautiful China and traditional music	999079c8037dd0a9debe83f4df4a5b0c	@mu6space	2009-05-26T19:57:55Z	0	en	0
so, Korean think everything is from Korean? I can't understand why current Korean like to say so. I am just curious.	so, Korean think everything is from Korean? I can't understand why current Korean like to say so. I am just curious.	116	19	KxVbdGPAfjE	Beautiful China and traditional music	da486627de393cdc795aff8fab92bada	@mu6space	2009-05-24T01:10:15Z	0	en	0
You call that traditional?	You call that traditional?	26	4	KxVbdGPAfjE	Beautiful China and traditional music	383eb60479bb4baa690c48ef29dfc83c	@Zielin87	2009-05-17T21:29:22Z	0	en	0
what the hell ?!?!?!?! It's so relaxing and so beautiful and then two minutes of news?? That kind of breaks the mood if you know what i'm sayin. Edit stuff before posting. Otherwise a very gorgeous video with superb music in it.	what the hell ?!?!?!?! It's so relaxing and so beautiful and then two minutes of news?? That kind of breaks the mood if you know what i'm sayin. Edit stuff before posting. Otherwise a very gorgeous video with superb music in it.	228	39	KxVbdGPAfjE	Beautiful China and traditional music	d456237128e054e2f1eb791626561f66	@hatchetmasta	2009-04-28T23:10:55Z	0	en	0
Arrrrg I was just listening to that clearly and peacefull music, until I got interrupted by those sucking NEWS! PLEASE CUT THAT OUT!	Arrrrg I was just listening to that clearly and peacefull music, until I got interrupted by those sucking NEWS! PLEASE CUT THAT OUT!	132	21	KxVbdGPAfjE	Beautiful China and traditional music	d149f8b93221dd866b952d749628b7a2	@BestFilmproducer	2009-04-17T16:40:25Z	0	en	0
This is one place I have always wanted to go. I cant think of anywhere with such rich history and beauty as China.	This is one place I have always wanted to go. I cant think of anywhere with such rich history and beauty as China.	114	21	KxVbdGPAfjE	Beautiful China and traditional music	360caabdc5ed49123b34ced8bd6f7ae6	@mirlegends	2009-04-15T16:25:36Z	0	en	0
download the program Youtube Downloader. Look it up on google. After you have downloaded it open it, copy and paste the link of this youtube video then download. After that just click convert previously downloaded file and chose MP3. Then you will have the song on your computer in mp3 format to put on itunes.	download the program Youtube Downloader. Look it up on google. After you have downloaded it open it, copy and paste the link of this youtube video then download. After that just click convert previously downloaded file and chose MP3. Then you will have the song on your computer in mp3 format to put on itunes.	310	55	KxVbdGPAfjE	Beautiful China and traditional music	af7b813da3218f3a8926b2e43d1465a4	@willusionist	2009-04-06T02:18:12Z	0	en	0
I wish I had your backyard. I'm from a different culture, but I love Chinese music! It helps me relax, and the Chinese have such breathtaking views! There's not much where I live. Just trees and dirt, but I like it. When the sunsets, it looks lovely.	I wish I had your backyard. I'm from a different culture, but I love Chinese music! It helps me relax, and the Chinese have such breathtaking views! There's not much where I live. Just trees and dirt, but I like it. When the sunsets, it looks lovely.	250	40	KxVbdGPAfjE	Beautiful China and traditional music	0ee51518d6f3354adeda38304daa7ef6	@nightlywaterlillies	2009-03-29T17:04:18Z	0	en	0
I love the song / pictures	I love the song / pictures	26	4	KxVbdGPAfjE	Beautiful China and traditional music	af53ca2099c8058ced4db9539b3573d5	@54spiritedwill54	2009-03-21T08:14:00Z	0	en	0
Very Gud. Long Live China & Pakistan Long live Pak/China frndship Greetings from Pakistan :)	Very Gud. Long Live China & Pakistan Long live Pak/China frndship Greetings from Pakistan :)	92	14	KxVbdGPAfjE	Beautiful China and traditional music	c56fd9b778996ef8c174c52b7375a158	@MuhammadAnasRehman	2009-03-20T11:02:04Z	0	en	0
whats name this song?	whats name this song?	21	4	KxVbdGPAfjE	Beautiful China and traditional music	d6a6d8885565d1fcb2e191ee5db92763	@user-iu1cs8me6j	2009-03-17T06:47:46Z	0	en	0
wow your backyard looks soo similar to ours! :D	wow your backyard looks soo similar to ours! :D	47	8	KxVbdGPAfjE	Beautiful China and traditional music	563fba058debed7c55d533dc9dd4adf6	@dangdealer	2009-03-09T18:21:02Z	0	en	0
Very nice impressions indeed! I hope they preserve their beautiful landscape. Greetings from Switzerland!	Very nice impressions indeed! I hope they preserve their beautiful landscape. Greetings from Switzerland!	105	13	KxVbdGPAfjE	Beautiful China and traditional music	6279d42ff243aaac6cb492b38b8eb150	@pascoett	2009-02-28T13:56:02Z	0	en	0
I love China! The Beijing Olympics were so great!	I love China! The Beijing Olympics were so great!	49	8	KxVbdGPAfjE	Beautiful China and traditional music	cca5dcc30804f2c5e1c4c280107c04fd	@SadronAphaderuiondur	2009-02-27T22:56:19Z	0	en	0
I love my country......	I love my country......	23	3	KxVbdGPAfjE	Beautiful China and traditional music	1477f76a9b6a8bc21741bc3f50ef69ae	@Chanchyin	2009-02-24T08:35:01Z	0	en	0
uhh i guess we are all the same..	uhh i guess we are all the same..	33	7	KxVbdGPAfjE	Beautiful China and traditional music	effb61f9305272dc4e1527e239a3a74b	@SoybeanVideo	2009-02-22T18:16:30Z	0	en	0
i have been there. at many places. but what you see in tv is not what you see when going there... you get a wrong opinion trusting only in "sightseeing-movies". of course there are many nice places, but you have to see the living situation also...	i have been there. at many places. but what you see in tv is not what you see when going there... you get a wrong opinion trusting only in "sightseeing-movies". of course there are many nice places, but you have to see the living situation also...	247	45	KxVbdGPAfjE	Beautiful China and traditional music	92f73ea825d74bd85f605ab2f15eb7b6	@Lucutus66	2009-02-19T20:13:06Z	0	en	0
China...a beautiful place, a place I wish to visit someday. This land holds many inspiration, the tails it holds, the secrets, the beauty, the food, and the music. All wonderful and beautiful.	China...a beautiful place, a place I wish to visit someday. This land holds many inspiration, the tails it holds, the secrets, the beauty, the food, and the music. All wonderful and beautiful.	192	30	KxVbdGPAfjE	Beautiful China and traditional music	75ae69796ca9db8becfb4219e0e4b5ae	@Roxie335	2009-02-15T08:53:35Z	0	en	0
and people remember we are not just asian we are also human. HUMAN PRIDE!	and people remember we are not just asian we are also human. HUMAN PRIDE!	73	14	KxVbdGPAfjE	Beautiful China and traditional music	cf11b1288fc06cc764339c8e419abddf	@SoybeanVideo	2009-02-14T08:38:20Z	0	en	0
i love my homeland but its just our government makes us look bad. CHINA WILL BE FREE SOMEDAY!	i love my homeland but its just our government makes us look bad. CHINA WILL BE FREE SOMEDAY!	93	17	KxVbdGPAfjE	Beautiful China and traditional music	68517c0b4bd5210e4cc22a2e30698aeb	@SoybeanVideo	2009-02-14T08:30:15Z	0	en	0
I'm right here in America waiting for you ;) LOVE the fact that you are German!	I'm right here in America waiting for you ;) LOVE the fact that you are German!	79	14	KxVbdGPAfjE	Beautiful China and traditional music	0c862a05dd4f48f98fbf0a4139d0fc26	@juuvvy	2009-02-14T04:10:16Z	0	en	0
in siegen ^^ and you? whoa XD what the ....?! XD	in siegen ^^ and you? whoa XD what the ....?! XD	48	9	KxVbdGPAfjE	Beautiful China and traditional music	5e6d2bfcea5831360740c2cfa098ef4d	@bichibachi	2009-02-07T17:44:48Z	0	en	0
XD whoaa you're so lucky <3 I'm always looking for an asian boyfriend, but there isn't anyone in my town...=[....so lonely...	XD whoaa you're so lucky <3 I'm always looking for an asian boyfriend, but there isn't anyone in my town...=[....so lonely...	125	21	KxVbdGPAfjE	Beautiful China and traditional music	0834a83d08cf51e74f1a4e06454208b1	@bichibachi	2009-01-31T09:04:24Z	0	en	0
it's like the grand canyon with forests	it's like the grand canyon with forests	39	7	KxVbdGPAfjE	Beautiful China and traditional music	de88206017b9b83cb38dd7b6b2418356	@strongestass	2009-01-30T18:42:28Z	0	en	0
I'm proud to be asian and i'm really thankful.	I'm proud to be asian and i'm really thankful.	46	7	KxVbdGPAfjE	Beautiful China and traditional music	4bc6603cddc5563bb8c0df5283f20b26	@bichibachi	2009-01-25T18:27:16Z	0	en	0
China is always the best, China is so beautiful, Forever China We love you forever !	China is always the best, China is so beautiful, Forever China We love you forever !	84	15	KxVbdGPAfjE	Beautiful China and traditional music	07c65b1d29535ec15445f24203d46aa0	@zhangmei12	2009-01-21T08:56:46Z	0	en	0
It's easy to see why there are a lot of landscape paintings.	It's easy to see why there are a lot of landscape paintings.	60	11	KxVbdGPAfjE	Beautiful China and traditional music	717a9049f73cb0a54e5e5e0b27f7d555	@smoke133	2009-01-20T07:17:35Z	0	en	0
ugliest place on earth...shit. you want beauty go to kansas bitches. my dog just pissed in my cats ass	ugliest place on earth...shit. you want beauty go to kansas bitches. my dog just pissed in my cats ass	102	20	KxVbdGPAfjE	Beautiful China and traditional music	825beb37f060c305e4fd95ca5567df51	@CountChocolitous	2009-01-16T06:59:54Z	0	en	0
Nice calming song...5***** for planetiger for posting this song.... I olso have some chinese music if you wana listened....Great song real great... tiger...	Nice calming song...5***** for planetiger for posting this song.... I olso have some chinese music if you wana listened....Great song real great... tiger...	156	23	KxVbdGPAfjE	Beautiful China and traditional music	d770334844e5f096122932096dfb34d8	@SFProject01	2009-01-15T15:50:21Z	0	en	0
so wonderfull T_T its incredible amazing T_T <33333	so wonderfull T_T its incredible amazing T_T <33333	51	6	KxVbdGPAfjE	Beautiful China and traditional music	c7ca34dea09fbbb1bcaefd883b31d55e	@Gieselherr2	2009-01-13T16:57:12Z	0	en	0
This is absolutely wonderful and beautiful, makes you wanna smile!! Very good pictures and the music is so relaxing!! AMAZING!! I've made a relaxing tune myself, please, if you've got the time, search for Soderman - relaxing sunsets take care everybody :)	This is absolutely wonderful and beautiful, makes you wanna smile!! Very good pictures and the music is so relaxing!! AMAZING!! I've made a relaxing tune myself, please, if you've got the time, search for Soderman - relaxing sunsets take care everybody :)	255	40	KxVbdGPAfjE	Beautiful China and traditional music	92242e99c1f1c176bdf9538166972393	@SodermanKim	2008-12-22T07:10:57Z	0	en	0
If you like this music, you would extremely enjoy the Chinese new year spectacular. This show has all the great tang drums and even includes amazing tricks that you would enjoy. This is an exhilarating celebration of classical Chinese dance and music featuring world-class performers. You would definitely enjoy this show if you are fond of the ancient or present Chinese cultures. Very beautiful mu…	If you like this music, you would extremely enjoy the Chinese new year spectacular. This show has all the great tang drums and even includes amazing tricks that you would enjoy. This is an exhilarating celebration of classical Chinese dance and music featuring world-class performers. You would definitely enjoy this show if you are fond of the ancient or present Chinese cultures. Very beautiful mu…	444	73	KxVbdGPAfjE	Beautiful China and traditional music	6ef88e1829ec3948ab701f2a55b07352	@a13bolony	2008-12-15T22:45:00Z	0	en	0
ive been to china and its not like that but at some spots its beautiful.	ive been to china and its not like that but at some spots its beautiful.	72	15	KxVbdGPAfjE	Beautiful China and traditional music	4d7196dc50668bfced349882a2ea00c6	@Dnr1gamer	2008-11-26T15:06:42Z	0	en	0
get a passport, buy a ticket? A u really only 13?	get a passport, buy a ticket? A u really only 13?	49	7	KxVbdGPAfjE	Beautiful China and traditional music	096faae1a8c788178b930cba9a3665c1	@eatfastnoodle	2008-11-25T10:26:49Z	0	en	0
what is the instrument that starts at the beginning and almost sounds like a brass instrument?	what is the instrument that starts at the beginning and almost sounds like a brass instrument?	94	15	KxVbdGPAfjE	Beautiful China and traditional music	6a1c8c83dfd39a006480287c0b2e9647	@generalsaam	2008-11-22T21:02:55Z	0	en	0
it reminds me of cafe' music or when the news chanel is showing the weather	it reminds me of cafe' music or when the news chanel is showing the weather	75	15	KxVbdGPAfjE	Beautiful China and traditional music	3d1ddb07de804e66e087094580f4c6e9	@biohazerdfilms	2008-11-20T21:22:36Z	0	en	0
it reminds me of me self jumping of a mountain and leting the wind take me away! (it fits in with the tune!)	it reminds me of me self jumping of a mountain and leting the wind take me away! (it fits in with the tune!)	108	22	KxVbdGPAfjE	Beautiful China and traditional music	8453dba6e7d92589ac6caec4352db8f0	@meldster	2008-11-20T18:21:32Z	0	en	0
I have no words, really, beautiful... I have to see and hear it every day...Briliant, I rate no five stars, but ten!!!	I have no words, really, beautiful... I have to see and hear it every day...Briliant, I rate no five stars, but ten!!!	118	20	KxVbdGPAfjE	Beautiful China and traditional music	0fc927b5f74e3fd7d00c0d4a421176a0	@Fionna7	2008-11-13T14:17:28Z	0	en	0
we did 6 weeks last summer, my wife did 6 months with her relatives, such a lovely time.	we did 6 weeks last summer, my wife did 6 months with her relatives, such a lovely time.	88	15	KxVbdGPAfjE	Beautiful China and traditional music	e07a2b62afa571cb477f6ef45a031f58	@steamsearcher	2008-11-01T10:51:22Z	0	en	0
I can't wait until this summer! I will spend 6 weeks in China!	I can't wait until this summer! I will spend 6 weeks in China!	62	10	KxVbdGPAfjE	Beautiful China and traditional music	6a8764727fe670864723bc6996822fcd	@saved2play	2008-10-29T23:21:01Z	0	en	0
LOVE-VA-LY LOVELY MUAH !!	LOVE-VA-LY LOVELY MUAH !!	25	5	KxVbdGPAfjE	Beautiful China and traditional music	a5eed45ba1ba07b8f8ea929a6f3f75f4	@sasrutolee	2008-10-26T00:34:17Z	0	en	0
i thinks its ( dow chyea, for canton) and (chi chi , for manderine). =P ^^_^^ priscilla	i thinks its ( dow chyea, for canton) and (chi chi , for manderine). =P ^^_^^ priscilla	87	12	KxVbdGPAfjE	Beautiful China and traditional music	94607be56ace0328f09e8de5e4855d4c	@sasrutolee	2008-10-26T00:33:01Z	0	en	0
No doubt that China is one of the most beautiful lands on Earth. Hope it lasts forever! I'd love to visit one day...	No doubt that China is one of the most beautiful lands on Earth. Hope it lasts forever! I'd love to visit one day...	116	22	KxVbdGPAfjE	Beautiful China and traditional music	1e3c9acd42f76cb81f82a2379cc8dd2c	@Anihime	2008-10-07T12:58:39Z	0	en	0
so nice music! it makes me feel relaxed!	so nice music! it makes me feel relaxed!	40	8	KxVbdGPAfjE	Beautiful China and traditional music	82f14c3fd6d73bd027f5dda3d02fb3e5	@HungrymanH	2008-10-02T08:03:58Z	0	en	0
this propaganda channel sucks... nice movie nice music and beautiful country! =)	this propaganda channel sucks... nice movie nice music and beautiful country! =)	80	11	KxVbdGPAfjE	Beautiful China and traditional music	fa11c1d51129b68de4a70e3d8ad3d3fa	@MoOnGo13	2008-09-27T15:54:48Z	0	en	0
I'm from New Zealand but I grew up in China, in Henan province. This video made me cry lol I miss China so much, it will always be my home.	I'm from New Zealand but I grew up in China, in Henan province. This video made me cry lol I miss China so much, it will always be my home.	139	27	KxVbdGPAfjE	Beautiful China and traditional music	6ad7fcada2e3b1792025e5ad6ed0d254	@themadoboist	2008-09-24T14:30:54Z	0	en	0
Can anyone tell me of a CD album which will have Chinese music like this on it?	Can anyone tell me of a CD album which will have Chinese music like this on it?	79	16	KxVbdGPAfjE	Beautiful China and traditional music	05c8eca39effe1604042aafbe6d903ea	@SelfImmolatorANP	2008-09-04T18:43:46Z	0	en	0
I like this music, and i wish that was my backyard! I would love to live in China	I like this music, and i wish that was my backyard! I would love to live in China	81	15	KxVbdGPAfjE	Beautiful China and traditional music	a993334da7b2bc8cfb1c881007253a18	@Ismeamandaaaaa	2008-09-02T04:57:05Z	0	en	0
I wish i lived somewhere in those mountains at those Temples... Really, really beautiful. I hope those landscapes will last forever, and i am certainly going to visit them alot in the future.	I wish i lived somewhere in those mountains at those Temples... Really, really beautiful. I hope those landscapes will last forever, and i am certainly going to visit them alot in the future.	191	29	KxVbdGPAfjE	Beautiful China and traditional music	9f4b8842dff5a35a1cd34450f6028f99	@Doug.Dimmadome	2008-08-08T22:18:14Z	0	en	0
our earth is wonderful.	our earth is wonderful.	23	4	KxVbdGPAfjE	Beautiful China and traditional music	c0989ae865133d128d881efc2bca9d86	@lauryn11e	2008-07-24T14:34:51Z	0	en	0
I marvel at the skill and talent on display, as well as the beauty of the music.	I marvel at the skill and talent on display, as well as the beauty of the music.	80	16	ujzMHLac404	Guzheng: "Spring River Flower Moon Night" 古筝 - 春江花月夜	00069248814acead858e8291264bfee1	@paulmiller7838	2026-01-21T02:41:14Z	0	en	0
Such a beautiful, majestic instrument. Very well played!	Such a beautiful, majestic instrument. Very well played!	56	7	ujzMHLac404	Guzheng: "Spring River Flower Moon Night" 古筝 - 春江花月夜	7f897867d6fddbd209ce34395b9b3007	@InterstateWarehousingCincinnat	2026-01-20T18:08:12Z	0	en	0
The people, culture, and traditions of your country are very rich and beautiful. I respect them a lot. I only wish that governments everywhere acted with the same kindness as their people.	The people, culture, and traditions of your country are very rich and beautiful. I respect them a lot. I only wish that governments everywhere acted with the same kindness as their people.	188	29	ujzMHLac404	Guzheng: "Spring River Flower Moon Night" 古筝 - 春江花月夜	7913337a2cfb749eb1bf5d93ff900b4d	@BrijeshLakhwara	2025-12-18T17:30:20Z	0	en	1
Can you give me guzheng sheet for this version ?	Can you give me guzheng sheet for this version ?	48	9	ujzMHLac404	Guzheng: "Spring River Flower Moon Night" 古筝 - 春江花月夜	2710b881d13509d297d6b4c4acc6de5a	@NữTừDungTrương	2025-12-16T07:18:44Z	0	en	0
Listening in 2025	Listening in 2025	17	3	ujzMHLac404	Guzheng: "Spring River Flower Moon Night" 古筝 - 春江花月夜	2ac7df358eb86cbb2e85bc1b3ba02a14	@19안제리	2025-10-26T18:36:45Z	0	en	1
a wrong wrong time ago	a wrong wrong time ago	22	4	ujzMHLac404	Guzheng: "Spring River Flower Moon Night" 古筝 - 春江花月夜	ae47bc4159d9de035646e7b6aff30c22	@alanpuffs5399	2025-10-16T23:29:46Z	0	en	0
Very beautiful music, pairs well with myGong fu tea session	Very beautiful music, pairs well with myGong fu tea session 😍	59	10	ujzMHLac404	Guzheng: "Spring River Flower Moon Night" 古筝 - 春江花月夜	83bbdbddb05aed9597fd7342a309bc3c	@YAWSSSSSS	2025-10-13T02:03:16Z	0	en	0
Maybe in 2026 ,i should learn it	Maybe in 2026 ,i should learn it 😊	32	6	ujzMHLac404	Guzheng: "Spring River Flower Moon Night" 古筝 - 春江花月夜	4af149e90f2a84098dd4f72d253a6282	@JulienL88	2025-10-13T01:50:22Z	0	en	0
Gu zheng is one of my most fave instruments of all time	Gu zheng is one of my most fave instruments of all time	55	12	ujzMHLac404	Guzheng: "Spring River Flower Moon Night" 古筝 - 春江花月夜	7ed76aa506d6cef14a6b2f52e0f5ff9f	@kaelvxd	2025-10-03T02:56:59Z	0	en	0
Sooooo Magnificent soul ofmlast historyif i am allow to a reincarnation I will be back home like a snake went to her ling amnesia soul but each time i listen	Sooooo Magnificent soul ofmlast history😭😭😭😭😭😭if i am allow to a reincarnation I will be back home like a snake 🐍 went to her ling amnesia soul but each time i ❤❤😢😢listen	157	25	ujzMHLac404	Guzheng: "Spring River Flower Moon Night" 古筝 - 春江花月夜	6f6e5676a54b158d8df45986ee9f5e14	@love-j4h6f	2025-09-27T13:59:08Z	0	en	1
2025, still a banger	2025, still a banger	20	3	ujzMHLac404	Guzheng: "Spring River Flower Moon Night" 古筝 - 春江花月夜	8c15b868b59546ac8c1bacf2a931c568	@dunkinmeatballs3029	2025-09-26T08:39:02Z	0	en	1
Do you currently teach others how to play this instrument over the internet by video, like on Zoom or similare video sharing software? thanks Laura in Uk England	Do you currently teach others how to play this instrument over the internet by video, like on Zoom or similare video sharing software? thanks Laura in Uk England	161	28	ujzMHLac404	Guzheng: "Spring River Flower Moon Night" 古筝 - 春江花月夜	0f095af3182843a6534e00041c985c6d	@lauraaqui219	2025-09-12T20:04:49Z	1	en	1
this sound is so beautiful, and your skill at playing it is so awesome, I just love listening to you play this wonderful instrument, I live in England UkI sometimes get to hear beautiful pieces of chinese music by watchingancient chinese and historical dramas on the Tv app iQlyl and Wetv from the App Store if I didnt watch it, I would not even know what this instrument was, I just think its sound…	this sound is so beautiful, and your skill at playing it is so awesome, I just love listening to you play this wonderful instrument, I live in England UkI sometimes get to hear beautiful pieces of chinese music by watchingancient chinese and historical dramas on the Tv app iQlyl and Wetv from the App Store if I didnt watch it, I would not even know what this instrument was, I just think its sound…	627	110	ujzMHLac404	Guzheng: "Spring River Flower Moon Night" 古筝 - 春江花月夜	67f6b0ee50060dcbdd93be4442402f38	@lauraaqui219	2025-09-12T20:00:40Z	0	en	1
That was amazing to watch and hear!	That was amazing to watch and hear!	35	7	ujzMHLac404	Guzheng: "Spring River Flower Moon Night" 古筝 - 春江花月夜	eda9c4e6372126bb8495b88fd93176c8	@trob1731	2025-08-25T21:24:26Z	0	en	0
Is that kungfu hustle music?	Is that kungfu hustle music?	28	5	ujzMHLac404	Guzheng: "Spring River Flower Moon Night" 古筝 - 春江花月夜	ba18e176b7f0cc82b9d26b7fc4adf149	@hendri1599	2025-08-23T17:00:53Z	0	en	0
Thank you for uploading	Thank you for uploading	23	4	ujzMHLac404	Guzheng: "Spring River Flower Moon Night" 古筝 - 春江花月夜	ed94c591859543dde8dd00d7436d5902	@TheLoudlyHappy	2025-08-18T20:44:35Z	0	en	0
My mind is somehow calmed by this chaotic dance of sound	My mind is somehow calmed by this chaotic dance of sound	56	11	ujzMHLac404	Guzheng: "Spring River Flower Moon Night" 古筝 - 春江花月夜	7db06f68ef9db3e35560dea85e69bc9b	@SattvaRig	2025-08-15T14:57:01Z	0	en	0
I'll get a beautiful instrument too!	I'll get a beautiful instrument too! 😊	36	5	ujzMHLac404	Guzheng: "Spring River Flower Moon Night" 古筝 - 春江花月夜	42599ced7ecb4a5049aa4574d166b70e	@DrBlack36	2025-08-15T12:58:55Z	0	en	0
Im listening to this in 2025 so beautiful	Im listening to this in 2025 ❤ so beautiful	41	8	ujzMHLac404	Guzheng: "Spring River Flower Moon Night" 古筝 - 春江花月夜	cc6c166a8aef8227bfdf2eb121c9b9ea	@red666banshee	2025-08-14T19:25:02Z	0	en	0
My cat was fascinated by this. Although she turned her head around when it was playing, otherwise she did not move a muscle. I am not sure if cats hear music the same way as we do, but in my experience with cats, they seem to like music. They may have a higher level of "music appreciation" than we do, because I've noticed that they don't care for rap :-)	My cat was fascinated by this. Although she turned her head around when it was playing, otherwise she did not move a muscle. I am not sure if cats hear music the same way as we do, but in my experience with cats, they seem to like music. They may have a higher level of "music appreciation" than we do, because I've noticed that they don't care for rap :-)	356	66	ujzMHLac404	Guzheng: "Spring River Flower Moon Night" 古筝 - 春江花月夜	b50df425bd57d5775a29007eac0a4f06	@WastrelWay	2025-08-03T15:45:11Z	0	en	1
this healed me more than I could ever expect	this healed me more than I could ever expect	44	8	ujzMHLac404	Guzheng: "Spring River Flower Moon Night" 古筝 - 春江花月夜	17a361223da758358ba14cce62dabc53	@LAPCGames	2025-07-18T20:25:11Z	0	en	0
Here from America. I just found out today the name of this instrument. This is so calming .	Here from America. I just found out today the name of this instrument. This is so calming 1:51 . ❤	91	16	ujzMHLac404	Guzheng: "Spring River Flower Moon Night" 古筝 - 春江花月夜	136487d2176530fa64ffd4ceab70cf24	@ladiesloveghost.	2025-07-04T22:51:49Z	0	en	0
This made me cry so beautiful thank you. I’ve saved this.	This made me cry so beautiful thank you. I’ve saved this. ❤	57	11	ujzMHLac404	Guzheng: "Spring River Flower Moon Night" 古筝 - 春江花月夜	b74e213072768beeabbd62a41a38bc48	@popflickbogeypoo	2025-07-03T06:16:39Z	0	en	0
What a beautiful playing sound	What a beautiful playing sound	30	4	ujzMHLac404	Guzheng: "Spring River Flower Moon Night" 古筝 - 春江花月夜	3bcace8ce27762fe859b9bff3b42cb85	@laplace3986	2025-07-02T16:30:28Z	0	en	0
Rubrub sampled the part from to make random song 05 hahaha cool	Rubrub sampled the part from 0:52 to make random song 05 hahaha cool	63	12	ujzMHLac404	Guzheng: "Spring River Flower Moon Night" 古筝 - 春江花月夜	6db52799f155f406a08fc9a66607a0a8	@ItzPupi	2025-06-18T19:05:06Z	0	en	1
My heart sinks	My heart sinks	14	3	ujzMHLac404	Guzheng: "Spring River Flower Moon Night" 古筝 - 春江花月夜	6183e1e85014f31f9eb46751b4331251	@thehairysun8897	2025-06-12T07:33:37Z	0	en	0
Can I use in my travel blog, last month I visited China, please?	Can I use in my travel blog, last month I visited China, please?	64	11	ujzMHLac404	Guzheng: "Spring River Flower Moon Night" 古筝 - 春江花月夜	ac0275cbd2a706d94fa7695b7a7f18bb	@rimambd	2025-06-12T03:32:11Z	2	en	1
I remember listening to this almost 15 years ago for the first time… it was my first time hearing a Chinese Musical instrument. I remember how badly I wanted to learn how to play the Guzheng in particular, but there’s no such instruments or classes in my country. Now, seeing this video so many years later… I feel rather motivated trying now instead	I remember listening to this almost 15 years ago for the first time… it was my first time hearing a Chinese Musical instrument. I remember how badly I wanted to learn how to play the Guzheng in particular, but there’s no such instruments or classes in my country. Now, seeing this video so many years later… I feel rather motivated trying now instead 😊	350	58	ujzMHLac404	Guzheng: "Spring River Flower Moon Night" 古筝 - 春江花月夜	2ffaee04dc119734a433e0a222dddceb	@ujasbezkrai	2025-05-29T12:42:37Z	0	en	1
Good relaxing music, I love this and peaceful of mind	Good relaxing music, I love this and peaceful of mind	53	9	ujzMHLac404	Guzheng: "Spring River Flower Moon Night" 古筝 - 春江花月夜	18db7da5c344d22a971ab418122823be	@TheGirlMusic-99	2025-05-20T01:33:29Z	0	en	0
My sleep music with jasmin tee drinking from my China restaurant every time there	My sleep music with jasmin tee drinking from my China restaurant every time there	81	14	ujzMHLac404	Guzheng: "Spring River Flower Moon Night" 古筝 - 春江花月夜	952639ef86e63fd9f91c7ad5ff12128e	@racoon1996-r7t	2025-05-11T18:34:30Z	0	en	0
A pond rippling, leaves flowing on it, trees at the corner-- is what come to my mind listening to it, it's beautiful.	A pond rippling, leaves flowing on it, trees at the corner-- is what come to my mind listening to it, it's beautiful.	117	21	ujzMHLac404	Guzheng: "Spring River Flower Moon Night" 古筝 - 春江花月夜	c09ba9babc1702dbc2c4b5a813f0cbc0	@LostLordofDawn	2025-05-01T17:23:14Z	1	en	2
you are a treasure.	you are a treasure.	19	3	ujzMHLac404	Guzheng: "Spring River Flower Moon Night" 古筝 - 春江花月夜	42c247fe57ee344db75cf8e837343c3b	@kalindichan	2025-04-11T20:32:51Z	0	en	0
You have such amazing talent, thank you for sharing it with us	You have such amazing talent, thank you for sharing it with us 🩷	62	12	ujzMHLac404	Guzheng: "Spring River Flower Moon Night" 古筝 - 春江花月夜	3c16d0b4b790099e089b3739f6fe6f86	@rayn0577	2025-04-11T16:14:41Z	0	en	0
I can’t stop listening to this. It’s been days	I can’t stop listening to this. It’s been days	46	8	ujzMHLac404	Guzheng: "Spring River Flower Moon Night" 古筝 - 春江花月夜	521dd06dac22ee979c4b2d649c25996d	@AnaElizabeth25	2025-04-11T14:48:15Z	0	en	0
idk about you but i came from kung fu hustle	idk about you but i came from kung fu hustle	44	9	ujzMHLac404	Guzheng: "Spring River Flower Moon Night" 古筝 - 春江花月夜	480377113a994ccdd76ca23aadbf710e	@olivertedkupsy24CBU	2025-04-01T19:34:14Z	0	en	1
I love ghuzang what a magical instrument so peaceful love from india	I love ghuzang what a magical instrument so peaceful love from india ❤	68	10	ujzMHLac404	Guzheng: "Spring River Flower Moon Night" 古筝 - 春江花月夜	d764177c310b27e548c5430194abcc81	@Susanta_Dey_Official	2025-03-30T19:06:54Z	1	en	1
It was a good performance, but it had recorded other noise in between the 26th and 28th seconds of this video. I have not listened to the whole musical performance yet. The recording was excellent.	It was a good performance, but it had recorded other noise in between the 26th and 28th seconds of this video. I have not listened to the whole musical performance yet. The recording was excellent.	197	35	ujzMHLac404	Guzheng: "Spring River Flower Moon Night" 古筝 - 春江花月夜	3495cfa0341ceb803750aa6b6acc74c6	@me2ebayuser	2025-03-29T03:04:58Z	0	en	0
I was playing a chinese mmo game i had to find this musical piece	I was playing a chinese mmo game i had to find this musical piece	65	11	ujzMHLac404	Guzheng: "Spring River Flower Moon Night" 古筝 - 春江花月夜	f1cf5367df589ffcc2af56da067ba195	@gmez9660	2025-03-27T12:41:17Z	0	en	0
Some have such a dreadful life.	Some have such a dreadful life.	31	5	ujzMHLac404	Guzheng: "Spring River Flower Moon Night" 古筝 - 春江花月夜	5a98406bae54ed8ba7041a074773e501	@AndreeaCe	2025-03-21T05:15:32Z	0	en	0
Every guzheng song is from Avatar	Every guzheng song is from Avatar	33	6	ujzMHLac404	Guzheng: "Spring River Flower Moon Night" 古筝 - 春江花月夜	bc1f57f95e7b5ca897541fbd5af8c471	@nathancks	2025-03-19T19:28:49Z	0	en	0
Remember watching this when this was a 1 year old video	Remember watching this when this was a 1 year old video❤	55	9	ujzMHLac404	Guzheng: "Spring River Flower Moon Night" 古筝 - 春江花月夜	569384b20830ecc37e9e9213650a45eb	@dilipaweeratunga	2025-02-23T17:42:39Z	0	en	0
First heard 15 years ago and still listening in 2025, still amazing. Timeless.	First heard 15 years ago and still listening in 2025, still 💯 amazing. Timeless.	78	13	ujzMHLac404	Guzheng: "Spring River Flower Moon Night" 古筝 - 春江花月夜	27400ec03fcdb2ff0881e99df54faae9	@kirk1968	2025-02-21T04:18:14Z	0	en	9
This is beautiful :)	This is beautiful :)	20	3	ujzMHLac404	Guzheng: "Spring River Flower Moon Night" 古筝 - 春江花月夜	4fde53d70cbd46321e58bf101321b8fd	@Mgsthpv	2025-02-19T09:31:05Z	0	en	1
Every time hear this that 4 strings touches my soul @	Every time hear this that 4 strings touches my soul @1:24	53	9	ujzMHLac404	Guzheng: "Spring River Flower Moon Night" 古筝 - 春江花月夜	b60a6f1ed32cdfe6e74253ab8e2abd7b	@acharsh	2025-02-06T04:32:25Z	0	en	2
what a wonderful music	what a wonderful music 👌🏼🪷🫠	22	3	ujzMHLac404	Guzheng: "Spring River Flower Moon Night" 古筝 - 春江花月夜	5c688275e6265b8f68382c7b57670360	@PardisKhaledi	2025-02-05T17:02:32Z	0	en	0
Wow!!!!!!!!!!!!!!!!!!Soooo Powerful and beautiful! Thank you!	Wow!!!!!!!!!!!!!!!!!!Soooo Powerful and beautiful! Thank you!	61	7	ujzMHLac404	Guzheng: "Spring River Flower Moon Night" 古筝 - 春江花月夜	4648a1abb5b748401c10318ec89f0599	@serenalite	2025-01-28T05:01:29Z	0	en	0
The accentuated hand motions are pretentious	The accentuated hand motions are pretentious	44	6	ujzMHLac404	Guzheng: "Spring River Flower Moon Night" 古筝 - 春江花月夜	a33ab0a8ea1b71c514bf30dd92c49e78	@HyperSimian	2025-01-26T12:59:39Z	0	en	0
Roaming my mountains, ponds and streams with All my animals , recbit .	Roaming my mountains, ponds and streams with All my animals 🏔️🌄 , recbit ❤.	70	11	ujzMHLac404	Guzheng: "Spring River Flower Moon Night" 古筝 - 春江花月夜	174981f3ead93c7e5cc51863cd74ba1c	@christopherchubbuck7296	2024-12-26T23:42:21Z	0	en	0
Nice best of the best	Nice best of the best	21	5	ujzMHLac404	Guzheng: "Spring River Flower Moon Night" 古筝 - 春江花月夜	63d346a5adde4de385c4732871b42929	@TengkuYuniHendra	2024-12-17T11:09:41Z	0	en	0
guzheng gotta be the most elegant and beautiful music instrument to play and to hear. it's like the symbol of chinese civilization	guzheng gotta be the most elegant and beautiful music instrument to play and to hear. it's like the symbol of chinese civilization	130	22	ujzMHLac404	Guzheng: "Spring River Flower Moon Night" 古筝 - 春江花月夜	081077f722b000753d2c90ea9091c5c2	@cloweystar	2024-12-16T13:16:32Z	1	en	0
Can i have the sheet please ?	Can i have the sheet please ?	29	5	ujzMHLac404	Guzheng: "Spring River Flower Moon Night" 古筝 - 春江花月夜	84a5929e5ee69a1f59391a1df70bb224	@AnnaLim-q1h	2024-12-05T00:55:35Z	0	en	0
Is there a specific genre to this sound? Any harp artists similar to this that I can binge on Spotify? This is my kind of harp playing, it’s so dreamy and emotional	Is there a specific genre to this sound? Any harp artists similar to this that I can binge on Spotify? This is my kind of harp playing, it’s so dreamy and emotional	164	30	ujzMHLac404	Guzheng: "Spring River Flower Moon Night" 古筝 - 春江花月夜	2314aff35653e2d51f2a9c0972c71fd5	@freedomfloww	2024-12-03T23:34:09Z	0	en	0
Because Intelligence (knowledge of perception) apart from wisdom (unconditional love) is the essence of bullshiet (false humility and dead works)	Because Intelligence (knowledge of perception) apart from wisdom (unconditional love) is the essence of bullshiet (false humility and dead works)	145	20	ujzMHLac404	Guzheng: "Spring River Flower Moon Night" 古筝 - 春江花月夜	52024c8b77f8b28ef837fe5615e35381	@adalbertoruize	2024-12-03T20:12:53Z	0	en	0
China is so rich with Music And HISTORY	China is so rich with Music And HISTORY	39	8	ujzMHLac404	Guzheng: "Spring River Flower Moon Night" 古筝 - 春江花月夜	399568ef7cadae148c7f40c2589f53bc	@MELLOWFELLO	2024-11-28T23:06:21Z	0	en	0
I see myself with my Taichi teacher on the field in combat. Leaping down rice terraces.	I see myself with my Taichi teacher on the field in combat. Leaping down rice terraces.	87	15	ujzMHLac404	Guzheng: "Spring River Flower Moon Night" 古筝 - 春江花月夜	dd36b8c0a15983f225d1f35bbe206906	@mattwoolford6305	2024-11-22T22:15:47Z	0	en	1
The Guzheng and violin are my favourite instruments. But the Guzheng is so complex and emotional. Tears.	The Guzheng and violin are my favourite instruments. But the Guzheng is so complex and emotional. Tears.	104	17	ujzMHLac404	Guzheng: "Spring River Flower Moon Night" 古筝 - 春江花月夜	ac58625b1a04c61cbb7184b6fb5b716f	@mattwoolford6305	2024-11-22T22:10:54Z	0	en	0
Eh else’s Chinese grandma knew how to play this?	Eh else’s Chinese grandma knew how to play this?	48	9	ujzMHLac404	Guzheng: "Spring River Flower Moon Night" 古筝 - 春江花月夜	086478fb3134c3a0e6ea2b68bb5ff14d	@Vivian-CK	2024-11-22T06:51:30Z	0	en	0
Makes me want to learn this wonderful instrument	Makes me want to learn this wonderful instrument ❤	48	8	ujzMHLac404	Guzheng: "Spring River Flower Moon Night" 古筝 - 春江花月夜	728aa339bda17762db2d69d1ee78e5f7	@mattijs3109	2024-11-21T16:53:00Z	0	en	0
This Instrument is so beautiful.	This Instrument is so beautiful.	32	5	ujzMHLac404	Guzheng: "Spring River Flower Moon Night" 古筝 - 春江花月夜	afa3b7d09b19550bd69ba22da748ea04	@Micha_WS	2024-11-04T02:42:37Z	0	en	0
Powerful!!! Ready for Battle!!!	Powerful!!! Ready for Battle!!!	31	4	ujzMHLac404	Guzheng: "Spring River Flower Moon Night" 古筝 - 春江花月夜	64793cb146d722d26053129b369c9545	@Enochalive	2024-11-02T21:24:30Z	0	en	1
That is THE MOST “thrown together trying to be philosophical” song name I’ve ever seen	That is THE MOST “thrown together trying to be philosophical” song name I’ve ever seen	86	15	ujzMHLac404	Guzheng: "Spring River Flower Moon Night" 古筝 - 春江花月夜	0124e74c3a386741a7703c3aca39c151	@Crimzon0	2024-11-01T15:00:36Z	0	en	0
China has a big heart	China has a big heart 🙂	21	4	ujzMHLac404	Guzheng: "Spring River Flower Moon Night" 古筝 - 春江花月夜	c87b62e1aa418d02f45c9209c295ef7f	@ianklitte5644	2024-10-29T11:29:58Z	0	en	1
Wonderful playing with this instrument!	Wonderful playing with this instrument!❤	39	5	ujzMHLac404	Guzheng: "Spring River Flower Moon Night" 古筝 - 春江花月夜	b8488d4006858e52bbbdd742c586ede1	@jannesdavilla	2024-10-26T06:25:57Z	0	en	0
This reminds me of the music in Wano, One Piece	This reminds me of the music in Wano, One Piece	47	10	ujzMHLac404	Guzheng: "Spring River Flower Moon Night" 古筝 - 春江花月夜	5f93c27aea3d946b8a7702aa715f3915	@mwhd441	2024-10-26T03:38:13Z	2	en	0
It's amazing at one end of Eurasia we made the piano and the other end this equally fantastic musical instrument. Both developed completely independently.	It's amazing at one end of Eurasia we made the piano and the other end this equally fantastic musical instrument. Both developed completely independently.	154	24	ujzMHLac404	Guzheng: "Spring River Flower Moon Night" 古筝 - 春江花月夜	6844aa8fcd083f90a4475826021ec025	@7john7able	2024-10-23T20:45:09Z	1	en	0
Lewis Joseph Garcia Joseph Thompson Gary	Lewis Joseph Garcia Joseph Thompson Gary	40	6	ujzMHLac404	Guzheng: "Spring River Flower Moon Night" 古筝 - 春江花月夜	eff196affb4eca86ebcd1154df5f9826	@FieldWordsworth-m5n	2024-10-15T05:49:26Z	0	en	0
I say Thank you for this as I am regaining my sanity	I say Thank you for this as I am regaining my sanity	52	10	ujzMHLac404	Guzheng: "Spring River Flower Moon Night" 古筝 - 春江花月夜	192525f7eda9bcd270ff354063c0bea6	@StephenMcBride-bf9bs	2024-10-12T12:32:52Z	0	en	0
Martinez Joseph White Edward Wilson Timothy	Martinez Joseph White Edward Wilson Timothy	43	6	ujzMHLac404	Guzheng: "Spring River Flower Moon Night" 古筝 - 春江花月夜	9a74ebbc1db40bece3dea8844e7fe55a	@merlinmilton7596	2024-10-01T19:13:47Z	0	en	0
I was here in 2024	I was here in 2024	18	4	ujzMHLac404	Guzheng: "Spring River Flower Moon Night" 古筝 - 春江花月夜	c5687abcd490e86c7ae631fb3908494f	@XozoZiwa	2024-10-01T18:27:41Z	0	en	1
Beautiful instrument and playing.	Beautiful instrument and playing.	33	4	ujzMHLac404	Guzheng: "Spring River Flower Moon Night" 古筝 - 春江花月夜	a60c3ccb60d6ce1701ed3fc9461fadd4	@george1la	2024-09-29T06:13:43Z	0	en	0
How is this instrument called	How is this instrument called	29	5	ujzMHLac404	Guzheng: "Spring River Flower Moon Night" 古筝 - 春江花月夜	5d5d2cb9f9c6745c259233bd9a2f7f06	@krasihristov1066	2024-09-26T18:12:35Z	1	en	0
My favorite instrument to hear	My favorite instrument to hear	30	5	ujzMHLac404	Guzheng: "Spring River Flower Moon Night" 古筝 - 春江花月夜	935a231d52e32d2a613c62021a25082e	@enriquerodriguez8244	2024-08-08T02:00:14Z	0	en	1
why do i love this piece so much	why do i love this piece so much	32	7	ujzMHLac404	Guzheng: "Spring River Flower Moon Night" 古筝 - 春江花月夜	4e06268a5ed48bcc4943386c57736427	@nin442	2024-07-31T13:35:55Z	0	en	1
Korea and Japan copied this instrument and now they say it's theirs.	Korea and Japan copied this instrument and now they say it's theirs.	68	12	ujzMHLac404	Guzheng: "Spring River Flower Moon Night" 古筝 - 春江花月夜	9e575ca58247d2a138da002c95c3e9f4	@sara.cbc92	2024-07-21T12:22:59Z	0	en	5
Peaceful and adorable	Peaceful and adorable	21	3	ujzMHLac404	Guzheng: "Spring River Flower Moon Night" 古筝 - 春江花月夜	51a2047d4a437c10571639d89d4a72b9	@rozitahmdi112	2024-07-14T07:08:28Z	0	en	0
This is amazing	This is amazing	15	3	ujzMHLac404	Guzheng: "Spring River Flower Moon Night" 古筝 - 春江花月夜	210daf3d4d5948ea9ff803fa89aeeecf	@natalyaramirez460	2024-06-28T02:58:27Z	0	en	0
Still one of the best sound music experience o ever could listen in my life time, thank you !	Still one of the best sound music experience o ever could listen in my life time, thank you !	93	17	ujzMHLac404	Guzheng: "Spring River Flower Moon Night" 古筝 - 春江花月夜	147f04bf2404a68d37fa10a4827858c5	@tamisshakra	2024-06-18T22:22:39Z	0	en	0
Love From Bangladesh	Love From Bangladesh	20	3	ujzMHLac404	Guzheng: "Spring River Flower Moon Night" 古筝 - 春江花月夜	d1bce855c75c2a63b2a195bbc8c59d13	@MdJahangirHosen-sk6ri	2024-06-07T20:13:39Z	1	en	1
some times its sad you cant like a video twice on youtube	some times its sad you cant like a video twice on youtube	57	11	ujzMHLac404	Guzheng: "Spring River Flower Moon Night" 古筝 - 春江花月夜	dd64224ebede742c5dbd69ae36537bba	@zubkvo	2024-05-19T10:15:08Z	0	en	1
MAY 2024 FLOWER MOON	MAY 2024 FLOWER MOON	20	4	ujzMHLac404	Guzheng: "Spring River Flower Moon Night" 古筝 - 春江花月夜	1b9163bf7d672d92067d74516b6f9e03	@nadiradutt8470	2024-05-11T12:31:20Z	0	en	2
i especially love the part between -	i especially love the part between 4:30 - 5:10	36	5	ujzMHLac404	Guzheng: "Spring River Flower Moon Night" 古筝 - 春江花月夜	6cd90ccfddc8dea52e0bf4d4032e8cbd	@samanthabirdx	2024-05-02T04:25:32Z	0	en	0
This was a banger i love it, it is a banger	This was a banger i love it, it is a banger	43	8	ujzMHLac404	Guzheng: "Spring River Flower Moon Night" 古筝 - 春江花月夜	d473f8ea27fe3f66c23ba6be7b013ba5	@AslanBladDemir	2024-04-23T09:33:13Z	0	en	0
What's the name this Instument. I want to play this	What's the name this Instument. I want to play this	51	9	ujzMHLac404	Guzheng: "Spring River Flower Moon Night" 古筝 - 春江花月夜	958123760b6287b12cc87732d855189f	@g_m_azhar	2024-04-15T17:27:14Z	8	en	0
It really makes me visualise being in China	It really makes me visualise being in China 🇨🇳	43	8	ujzMHLac404	Guzheng: "Spring River Flower Moon Night" 古筝 - 春江花月夜	20c45e88750c8201e95758f54ca58135	@robertcreighton4635	2024-04-10T18:30:11Z	0	en	0
It’s 2024 and I’m listening to this so early in the morning it has a calming effect ..	It’s 2024 and I’m listening to this so early in the morning it has a calming effect ..	86	15	ujzMHLac404	Guzheng: "Spring River Flower Moon Night" 古筝 - 春江花月夜	9dc61dfd37804d0b648ea73501b87c89	@GiGi-p6o	2024-03-26T13:20:20Z	0	en	36
14 years old and the sound still melt my heart	14 years old and the sound still melt my heart	46	10	ujzMHLac404	Guzheng: "Spring River Flower Moon Night" 古筝 - 春江花月夜	3425943ecfad459774e4c1ff29da11fc	@skatr62	2024-03-22T14:14:30Z	1	en	19
What ist she doing ? Meditations meanwhile music?	What ist she doing ? Meditations meanwhile music? 😃💖 5:15	49	7	ujzMHLac404	Guzheng: "Spring River Flower Moon Night" 古筝 - 春江花月夜	7c664ad98fdf641494f7e600531a7e54	@baluernst1988	2024-03-19T17:31:14Z	0	en	1
The strings of this instrument tug at one's soul. Freeing whatever tears are lodged within the Rocky crevasses of one's heart. This instrument brings one to a garden of refreshing lotus flowers and gentle river blabbering, or a breeze blown foresr, gently swaying almost dancing in the wind. This is truly inspiring and calming music. Thank you.	The strings of this instrument tug at one's soul. Freeing whatever tears are lodged within the Rocky crevasses of one's heart. This instrument brings one to a garden of refreshing lotus flowers and gentle river blabbering, or a breeze blown foresr, gently swaying almost dancing in the wind. This is truly inspiring and calming music. Thank you.	345	55	ujzMHLac404	Guzheng: "Spring River Flower Moon Night" 古筝 - 春江花月夜	c166092eb18ae6dd657930807e604c7d	@CouchAlien	2024-03-14T17:07:45Z	0	en	1
Thank you so much for sharing your wonderful beautiful music with us...I feel like I'm in heaven...	Thank you so much for sharing your wonderful beautiful ❤️❤️ music with us...I feel like I'm in heaven...❤❤❤	99	16	ujzMHLac404	Guzheng: "Spring River Flower Moon Night" 古筝 - 春江花月夜	f3d99306a2396dcae612862432599d0d	@lindareese4579	2024-03-13T20:17:18Z	0	en	2
What is the tuning? Key D?	What is the tuning? Key D?	26	5	ujzMHLac404	Guzheng: "Spring River Flower Moon Night" 古筝 - 春江花月夜	2ee71a1e1007a40298599b68f56fc020	@andreyshchempik	2024-03-13T03:25:13Z	2	en	0
Lovely, the sounds of the negioth.	Lovely, the sounds of the negioth.😢	34	6	ujzMHLac404	Guzheng: "Spring River Flower Moon Night" 古筝 - 春江花月夜	9cd4795ad68ba6fe1367827963023fa9	@michaeljames955	2024-02-28T23:29:41Z	0	en	0
If you listen close enough, you can hear the beauty of the Chinese Communist Party finally collapsing.	If you listen close enough, you can hear the beauty of the Chinese Communist Party finally collapsing.	102	17	ujzMHLac404	Guzheng: "Spring River Flower Moon Night" 古筝 - 春江花月夜	d6b1cd47cf5838a78f6ebf11ca5c187b	@joeyjojojunior1794	2024-02-21T23:02:16Z	0	en	0
A 14 year old gem! This is so beautiful!	A 14 year old gem! This is so beautiful!	40	8	ujzMHLac404	Guzheng: "Spring River Flower Moon Night" 古筝 - 春江花月夜	ac1586597770618c883942b80666af1e	@DAISYDEVIL2007	2024-02-12T05:39:48Z	0	en	0
I have one of these. They're pretty cool . Obviously this talent is way beyond me	I have one of these. They're pretty cool . Obviously this talent is way beyond me	81	15	ujzMHLac404	Guzheng: "Spring River Flower Moon Night" 古筝 - 春江花月夜	ca8867e83dd006bc6f6fc5c67ba03598	@FantasyVisuals	2024-01-07T17:57:26Z	0	en	0
I also play Guzheng too	I also play Guzheng too	23	4	ujzMHLac404	Guzheng: "Spring River Flower Moon Night" 古筝 - 春江花月夜	a46299848a7abd3e9f4b2170dfea31c3	@madelynxl	2023-12-18T13:48:21Z	0	en	0
spell binding.. thank you.. :0)	spell binding.. thank you.. :0)	31	4	ujzMHLac404	Guzheng: "Spring River Flower Moon Night" 古筝 - 春江花月夜	d2956cc051d68074083d729f5d57fadd	@paulflute	2023-12-16T02:49:33Z	0	en	0
jeez that is so nicely in tune. A gift to ears!	3:34 jeez that is so nicely in tune. A gift to ears!	47	10	ujzMHLac404	Guzheng: "Spring River Flower Moon Night" 古筝 - 春江花月夜	3a8a11ce70c2e358d6f910cacbbb0374	@valuablesandwich	2023-12-11T04:31:23Z	0	en	0
Talented and very tranquil music.she plays good and it looks confusing but as I watch I see what she’s doing and where sounds come from left side right side. Must take a very long time and much practice. Thank you for making this wonderful video. Almost like a harp. I’d like to try this as it’s encouraging as I play guitar, zither, organ, so I would think with long training it might be nice	👍🎶😺Talented and very tranquil music.she plays good and it looks confusing but as I watch I see what she’s doing and where sounds come from left side right side. Must take a very long time and much practice. Thank you for making this wonderful video. Almost like a harp. I’d like to try this as it’s encouraging as I play guitar, zither, organ, so I would think with long training it might be nice	393	68	ujzMHLac404	Guzheng: "Spring River Flower Moon Night" 古筝 - 春江花月夜	7b57c81bd6271fe66e63d2c35cb06e16	@gypsygirl731	2023-12-04T09:15:39Z	0	en	0
This is better then the Banjo	This is better then the Banjo	29	6	ujzMHLac404	Guzheng: "Spring River Flower Moon Night" 古筝 - 春江花月夜	9509013bd7fd12929f6faad51afd0285	@F0gGrlDream	2023-11-22T16:50:00Z	1	en	1
This is what I'm searching for in drama they always said emei	This is what I'm searching for in drama they always said emei	61	11	ujzMHLac404	Guzheng: "Spring River Flower Moon Night" 古筝 - 春江花月夜	97004dcd3f39748d67b2ff7d8685be79	@wocincangmaaaaiyaaa3995	2023-11-14T13:21:09Z	0	en	1
At times like a harp and then a guitar	At times like a harp and then a guitar	38	7	ujzMHLac404	Guzheng: "Spring River Flower Moon Night" 古筝 - 春江花月夜	04b06d5556237c248629a0fea658519a	@ledal777	2023-11-04T18:59:15Z	0	en	1
It's amazing that one instrument can make such beautiful music.	It's amazing that one instrument can make such beautiful music.	63	10	ujzMHLac404	Guzheng: "Spring River Flower Moon Night" 古筝 - 春江花月夜	07dd772bd11eecd441c48a98019ee66d	@stephenamato918	2023-11-01T18:49:31Z	0	en	3
Wow love it	Wow love it	11	3	ujzMHLac404	Guzheng: "Spring River Flower Moon Night" 古筝 - 春江花月夜	fa8903a43b61f005a316467891fbdc62	@rakeshraivlog	2023-10-30T18:42:35Z	0	en	0
Chinese is better and good and relax	Chinese is better and good and relax	36	7	ujzMHLac404	Guzheng: "Spring River Flower Moon Night" 古筝 - 春江花月夜	08413b31e04a5b90d362ab97f17ab52e	@chongsl78	2023-10-26T14:58:43Z	0	en	1
Imagine what life would be like if we didn't have radio in YouTube and ways to hear the music outside of a live show most people would never imagine being able to enjoy this	Imagine what life would be like if we didn't have radio in YouTube and ways to hear the music outside of a live show most people would never imagine being able to enjoy this	173	33	ujzMHLac404	Guzheng: "Spring River Flower Moon Night" 古筝 - 春江花月夜	aa969ed3fc18f1900965adc3a89fc902	@richardtscott7489	2023-09-30T00:54:39Z	0	en	0
Very beautiful, a true professional	Very beautiful, a true professional	35	4	ujzMHLac404	Guzheng: "Spring River Flower Moon Night" 古筝 - 春江花月夜	8eea797d32a64133cac590b456f99c4e	@NicThatOneKid	2023-09-29T04:26:20Z	0	en	0
Avatar the last air bender	Avatar the last air bender	26	5	ujzMHLac404	Guzheng: "Spring River Flower Moon Night" 古筝 - 春江花月夜	1efe79a002f4b94fe9e578dc40a808fc	@SeanMoore-b8r	2023-09-22T07:42:20Z	0	en	0
the noname - chaos Changan (xian Punk Band ) bring me here . because of they feat guzheng player on their song . beautiful melody.	the noname - chaos Changan (xian Punk Band ) bring me here . because of they feat guzheng player on their song . beautiful melody.	130	21	ujzMHLac404	Guzheng: "Spring River Flower Moon Night" 古筝 - 春江花月夜	f93f6bc8f75128dc48078b3132b51f71	@pawieification	2023-09-12T03:53:01Z	0	en	1
Wow! Now this is just one peaceful songgggggg	Wow! Now this is just one peaceful songgggggg	45	8	ujzMHLac404	Guzheng: "Spring River Flower Moon Night" 古筝 - 春江花月夜	aa5bc5ccd14832278c2f1d8362f63b99	@AscendantPerfection	2023-09-01T01:36:22Z	0	en	0
Bro opening a big phat bud light can at	Bro opening a big phat bud light can at 0:28 💀	39	8	ujzMHLac404	Guzheng: "Spring River Flower Moon Night" 古筝 - 春江花月夜	d002660117bbf8925e59b3b315e6c504	@jnsn94	2023-08-25T04:17:40Z	0	en	1
The weirdest part is, that I know this song from Civilization 6 so random,bcs I see they implemented parts of this song in there background music, when playing as a chinese or asian nation	The weirdest part is, that I know this song from Civilization 6 😂so random,bcs I see they implemented parts of this song in there background music, when playing as a chinese or asian nation	188	31	ujzMHLac404	Guzheng: "Spring River Flower Moon Night" 古筝 - 春江花月夜	ad1396ec2ca6deb0f7332b932c757527	@Saltkoenigin	2023-08-17T23:29:21Z	0	en	0
I love playing string instruments ..... I play guitar but I love listening to koto the most.... It has some kind of traditional vibe on it.... I'd love to play it someday or listen to it alone enjoying the view of a waterfall.....or a mountain pick....if someone reading this comment... If u can do it just do it.... I'm sure it will reset ur mind and ull feel the most relaxing and young....	I love playing string instruments ..... I play guitar but I love listening to koto the most.... It has some kind of traditional vibe on it.... I'd love to play it someday or listen to it alone enjoying the view of a waterfall.....or a mountain pick....if someone reading this comment... If u can do it just do it.... I'm sure it will reset ur mind and ull feel the most relaxing and young....	392	66	ujzMHLac404	Guzheng: "Spring River Flower Moon Night" 古筝 - 春江花月夜	b70c80e6d33523306423ab01d98428a2	@jyotishmandeuri702	2023-08-17T14:36:03Z	0	en	0
I want to learn to play this instrument but since I live in France and this instrument is not very common and I'm already a sh!t to play the guitar so	I want to learn to play this instrument but since I live in France and this instrument is not very common and I'm already a sh!t to play the guitar so😭	150	27	ujzMHLac404	Guzheng: "Spring River Flower Moon Night" 古筝 - 春江花月夜	a7556e4695f582e3d06eca6c6611205f	@kyeou	2023-08-05T15:02:15Z	3	en	0
Very beautiful sweet music video	Very beautiful sweet music video	32	5	ujzMHLac404	Guzheng: "Spring River Flower Moon Night" 古筝 - 春江花月夜	d94ef3b579d4a41b48be02d3bbb1a82b	@kailashsingh9737	2023-08-01T14:44:51Z	0	en	1
This is amazing. I am transported	This is amazing. I am transported	33	5	ujzMHLac404	Guzheng: "Spring River Flower Moon Night" 古筝 - 春江花月夜	04ff929e805973f205f81f8a1a99993e	@peggyh3788	2023-07-25T05:05:23Z	0	en	0
I hear this instrument unstruck in my mind before and after meditations	I hear this instrument unstruck in my mind before and after meditations	71	11	ujzMHLac404	Guzheng: "Spring River Flower Moon Night" 古筝 - 春江花月夜	06a032a3c08ea6a38a5b2da4773485c8	@williammyers5593	2023-07-22T15:20:07Z	0	en	0
Congrats! Another kind of song 60 000 views in 12 days!	Congrats! Another kind of song 60 000 views in 12 days! https://www.youtube.com/watch?v=NE0tWhwEP84	55	11	ujzMHLac404	Guzheng: "Spring River Flower Moon Night" 古筝 - 春江花月夜	3a41a8f5181d304fd48a16875248a7ca	@FreddyZucchet1	2023-07-20T19:12:31Z	0	en	0
Actually i really love traditional music art if china. And this instrument is so calming. Love from india	Actually i really love traditional music art if china. And this instrument is so calming. Love from india💜😇	105	17	ujzMHLac404	Guzheng: "Spring River Flower Moon Night" 古筝 - 春江花月夜	e734765c7bf9ab5d2057c3e3b493b0ae	@shyambhagat5613	2023-07-18T14:39:07Z	0	en	0
I love you soooo much Chinese 369 stand a fine line	I love you soooo much Chinese ❤369 stand a fine line	51	9	ujzMHLac404	Guzheng: "Spring River Flower Moon Night" 古筝 - 春江花月夜	7b88e377096f53062a6d3dada47e50be	@ZienMonkey369	2023-07-16T01:58:27Z	0	en	1
what a cheerful instrument!	what a cheerful instrument!	27	3	ujzMHLac404	Guzheng: "Spring River Flower Moon Night" 古筝 - 春江花月夜	c91dcc419164956091eed787ace50cda	@yeolainemasutha5942	2023-07-12T19:55:32Z	0	en	0
There is a pair, who are the spring and the dream. This pair are you and your instrument. Thank you the nice dream from here, the far-far Hungary.	There is a pair, who are the spring and the dream. This pair are you and your instrument. Thank you the nice dream from here, the far-far Hungary.	146	28	ujzMHLac404	Guzheng: "Spring River Flower Moon Night" 古筝 - 春江花月夜	4c77b005877f1ea4c4d80a6de485adad	@Unikó1754	2023-07-06T16:21:32Z	0	en	0
Imagine if someone play e rush on one	Imagine if someone play e rush on one	37	7	ujzMHLac404	Guzheng: "Spring River Flower Moon Night" 古筝 - 春江花月夜	7ef2e8f6e19342609d2b08c1353373e9	@mistypurdy74	2023-06-21T13:02:34Z	0	en	0
First time I have seen this musical instrument. It's also a beautiful song.	First time I have seen this musical instrument. It's also a beautiful song.	75	11	ujzMHLac404	Guzheng: "Spring River Flower Moon Night" 古筝 - 春江花月夜	39c351fc6dc4622a665a418ca33d75cf	@josiesanosa3152	2023-06-18T22:48:11Z	0	en	0
So beautiful,thank you....and now im in tears.. you are a master..and you can have my breath,im so happy..	So beautiful,thank you....and now im in tears.. you are a master..and you can have my breath,im so happy..	106	21	ujzMHLac404	Guzheng: "Spring River Flower Moon Night" 古筝 - 春江花月夜	bf85acc91a6793672e9eb0784462fd63	@elsesblink	2023-06-17T12:56:33Z	0	en	1
Tales of Ba Sing Se Type beat <3	Tales of Ba Sing Se Type beat <3	32	7	ujzMHLac404	Guzheng: "Spring River Flower Moon Night" 古筝 - 春江花月夜	e16da8fba91bb23d51fda6869a35decd	@diewanderh00re64	2023-06-13T14:13:59Z	0	en	0
Is it wrong as an American to say , THE USA is in complete turmoli, can I just be in a place like this. I just want peace. I want to be lost in land of beauty, where all the hatred and problems of the modern world no longer exist. Just peace and life. I would give up all...for something as peacefull as this sounds	Is it wrong as an American to say , THE USA is in complete turmoli, can I just be in a place like this. I just want peace. I want to be lost in land of beauty, where all the hatred and problems of the modern world no longer exist. Just peace and life. I would give up all...for something as peacefull as this sounds	315	60	ujzMHLac404	Guzheng: "Spring River Flower Moon Night" 古筝 - 春江花月夜	04cf4cc83213a5453dfcc32f1053d658	@jessicabremer9735	2023-06-04T14:52:24Z	1	en	3
Fun fanct: The Etwahl's shape, Sona's instrument, is based on Guzheng	Fun fanct: The Etwahl's shape, Sona's instrument, is based on Guzheng	69	11	ujzMHLac404	Guzheng: "Spring River Flower Moon Night" 古筝 - 春江花月夜	78dc56204b2444e2f4517ddd3724fb96	@helenpink2796	2023-05-28T13:28:19Z	0	en	1
I've heard it on a Chinese musical even in my University in Morocco. It was mesmerizing to listen to this masterpiece.	I've heard it on a Chinese musical even in my University in Morocco. It was mesmerizing to listen to this masterpiece.	118	20	ujzMHLac404	Guzheng: "Spring River Flower Moon Night" 古筝 - 春江花月夜	992e03faaead2b4d55da647e3570e501	@stern_noon	2023-05-24T05:57:28Z	0	en	2
I play traditional germanic instruments (tagelharpas and kravik lyres) however the beauty of traditional chinese instruments is enough to move me to tears. I will never touch one of these instruments out of respect for the culture and the poetry it embodies. This music is deeply tied to time and place. However, I, like many others, can recognise beauty when I see and hear it. Be proud of your her…	I play traditional germanic instruments (tagelharpas and kravik lyres) however the beauty of traditional chinese instruments is enough to move me to tears. I will never touch one of these instruments out of respect for the culture and the poetry it embodies. This music is deeply tied to time and place. However, I, like many others, can recognise beauty when I see and hear it. Be proud of your her…	434	70	ujzMHLac404	Guzheng: "Spring River Flower Moon Night" 古筝 - 春江花月夜	15babd11a919b3edeb0718a1030428a7	@DatGloriaVires	2023-05-17T16:55:30Z	0	en	2
That instrument makes absolutely beautiful sounds. I've been in love with those sounds since encountering some music in Hitman Contracts ( ) and Rainbow Six Vegas 2 ( )Very graceful and elegant playing here, amps the magic to 11	That instrument makes absolutely beautiful sounds. I've been in love with those sounds since encountering some music in Hitman Contracts ( https://www.youtube.com/watch?v=g0KHdqXL0Nc ) and Rainbow Six Vegas 2 ( https://www.youtube.com/watch?v=qyox3P45Qak )Very graceful and elegant playing here, amps the magic to 11 🥰	228	35	ujzMHLac404	Guzheng: "Spring River Flower Moon Night" 古筝 - 春江花月夜	cf171788293321c51eb079a17db93c2e	@Johny40Se7en	2023-05-13T01:54:49Z	0	en	5
I’ve got to buy one of these and play it every day...I think it’ll save my life.	I’ve got to buy one of these and play it every day...I think it’ll save my life.	80	18	ujzMHLac404	Guzheng: "Spring River Flower Moon Night" 古筝 - 春江花月夜	cc007963275a9e95253148568617e8ec	@joewallawalla6442	2023-05-01T00:27:37Z	0	en	0
Thanks for the love to the river	Thanks for the love to the river	32	7	ujzMHLac404	Guzheng: "Spring River Flower Moon Night" 古筝 - 春江花月夜	801957bd89a10ed38bf090680d2fcba0	@larrytaylor2530	2023-04-15T13:03:15Z	0	en	1
Pls make it " not download ". Many people kor, jap hijacking China culture, as their own.	Pls make it " not download ". Many people kor, jap hijacking China culture, as their own.	89	15	ujzMHLac404	Guzheng: "Spring River Flower Moon Night" 古筝 - 春江花月夜	08f3893913b2b565c62403768132a7e0	@TESTTER-sd8yv	2023-04-13T10:53:00Z	0	en	3
Goosebumps every time	Goosebumps every time	21	3	ujzMHLac404	Guzheng: "Spring River Flower Moon Night" 古筝 - 春江花月夜	29e5ab960c1dae753e6a7f0726be15e8	@r3dtig3r	2023-04-11T01:24:20Z	0	en	2
Beautyful and spiritual of essence.	Beautyful and spiritual of essence.	35	5	ujzMHLac404	Guzheng: "Spring River Flower Moon Night" 古筝 - 春江花月夜	c69d3a358addb790ff10f25515ce1943	@robertryan1881	2023-04-10T21:57:37Z	0	en	2
There was unknown technology used and a possible link then with Nazis. The Nazis were in operation in WW1 as well though it was not admitted. The unknown technology may have included many energies. Hideous hybrids may have been used. There may have been vaporization .A lot of red energies with black particulate left behind .Someone boasted; " we're sending our men down". This points at creatures …	There was unknown technology used and a possible link then with Nazis. The Nazis were in operation in WW1 as well though it was not admitted. The unknown technology may have included many energies. Hideous hybrids may have been used. There may have been vaporization 😢.A lot of red energies with black particulate left behind .Someone boasted; " we're sending our men down". This points at creatures…	485	81	ujzMHLac404	Guzheng: "Spring River Flower Moon Night" 古筝 - 春江花月夜	1ef496e6f84b8824555e640f2f42d31f	@lisaguthrie174	2023-03-28T22:45:56Z	0	en	0
I like that song	I like that song	16	3	ujzMHLac404	Guzheng: "Spring River Flower Moon Night" 古筝 - 春江花月夜	57cc34a9ca6e4965bb40eb19b95e8ffc	@limtsuihong3130	2023-03-25T09:42:48Z	0	en	1
Wow, Beautiful Upload friend. keep it up. Thank you for sharing this to us. Greetings from Korea	Wow, Beautiful Upload friend. keep it up. Thank you for sharing this to us. Greetings from Korea	96	17	ujzMHLac404	Guzheng: "Spring River Flower Moon Night" 古筝 - 春江花月夜	b078019213616841534b78665f3a8641	@ponyrang	2023-03-22T07:03:49Z	0	en	1
This is my favourite instrument since I was a child. Seriously the most beautiful sound ever. I have played music, but nothing compares to the tranquil, romantic quality of this, and how it puts in mind the most dreamy things. It's like a harp and a mandolin together. Closest I can compare.	This is my favourite instrument since I was a child. Seriously the most beautiful sound ever. I have played music, but nothing compares to the tranquil, romantic quality of this, and how it puts in mind the most dreamy things. It's like a harp and a mandolin together. Closest I can compare.	291	46	ujzMHLac404	Guzheng: "Spring River Flower Moon Night" 古筝 - 春江花月夜	3b0777547757a036d8a63e3dbe7ff171	@lucyanderson9064	2023-03-12T09:23:35Z	0	en	2
Wow , exquisite ancient music . Thank you for this upload .	Wow , exquisite ancient music . Thank you for this upload .	59	9	ujzMHLac404	Guzheng: "Spring River Flower Moon Night" 古筝 - 春江花月夜	4f9ddfe2db7e5348261b841d485fb525	@gardensofthegods	2023-03-06T20:54:31Z	0	en	1
I’m as a northern Irish Vietnamese I love this trad music.	I’m as a northern Irish Vietnamese I love this trad music.	58	8	ujzMHLac404	Guzheng: "Spring River Flower Moon Night" 古筝 - 春江花月夜	36722326796b10d3ce307191fc7e4d1a	@Jamcam99	2023-02-25T20:52:53Z	1	en	8
Oh, so a koto is just the same	Oh, so a koto is just the same	30	7	ujzMHLac404	Guzheng: "Spring River Flower Moon Night" 古筝 - 春江花月夜	2ed46e96a7dddf8d1e9d3ce45004b054	@chillnote123	2023-02-19T14:11:54Z	1	en	0
I love to hear this even over and over,thanks i can hear it on youtube whenever i want,i don't get tired with this	I love to hear this even over and over,thanks i can hear it on youtube whenever i want,i don't get tired with this	114	21	ujzMHLac404	Guzheng: "Spring River Flower Moon Night" 古筝 - 春江花月夜	a6542a5aba6dbef5449319a777ec36d5	@estheryeu1587	2023-02-14T17:16:28Z	0	en	3
sounds like the villain in kugnfu panda	1:11 sounds like the villain in kugnfu panda	39	7	ujzMHLac404	Guzheng: "Spring River Flower Moon Night" 古筝 - 春江花月夜	560579d031ad547d707fd56dcd1fe48c	@oawsk	2023-02-06T10:58:16Z	0	en	0
Flashbacks of Viet…BaSingSe	Flashbacks of Viet…BaSingSe	27	4	ujzMHLac404	Guzheng: "Spring River Flower Moon Night" 古筝 - 春江花月夜	c4565bad655ad7d6b590d058151361eb	@alexmetal3525	2023-02-04T07:30:31Z	0	en	0
I love Chinese music especially in those old 1970s kung fu movies	I love Chinese music especially in those old 1970s kung fu movies 🎬	65	11	ujzMHLac404	Guzheng: "Spring River Flower Moon Night" 古筝 - 春江花月夜	f3534d0a8000d52328deda0d8660b1e6	@treovercoakley2404	2023-01-30T08:53:37Z	0	en	3
song is in kung fu hustle right?	song is in kung fu hustle right?	32	7	ujzMHLac404	Guzheng: "Spring River Flower Moon Night" 古筝 - 春江花月夜	ce4eb761b0d1c9f346f29f81cfe88459	@ernestz.	2023-01-29T07:53:03Z	0	en	0
If you have an additional phone I recommend finding rainfall in the city with lightning, play together at the same time	If you have an additional phone I recommend finding rainfall in the city with lightning, play together at the same time	119	20	ujzMHLac404	Guzheng: "Spring River Flower Moon Night" 古筝 - 春江花月夜	71e8d9bebf57e90dd0a567a6cdf3347e	@mattetch12	2023-01-24T04:51:17Z	0	en	0
I’m saying bullshit, I hope I’m wrong! I can see beats playing in between strokes.	I’m saying bullshit, I hope I’m wrong! I can see beats playing in between strokes.	82	11	ujzMHLac404	Guzheng: "Spring River Flower Moon Night" 古筝 - 春江花月夜	fb77185e8507e3b9b4f356810a16a758	@NickSFCA	2023-01-22T10:39:34Z	0	en	0
"Whats your favorite song?" Me: deep inhale	"Whats your favorite song?" Me: deep inhale	43	7	ujzMHLac404	Guzheng: "Spring River Flower Moon Night" 古筝 - 春江花月夜	92843eac316458144c38b62191a5740e	@MyNameHere101	2023-01-16T05:27:28Z	0	en	0
Beaitiful...please where did you by things metal for protect the nails?	Beaitiful...please where did you by things metal for protect the nails?	71	12	ujzMHLac404	Guzheng: "Spring River Flower Moon Night" 古筝 - 春江花月夜	b4f9326488dd472951e6c4187014b38f	@mei-lihauyon-caligraficas	2023-01-07T21:37:15Z	0	en	0
Absolutely beautiful please can you play nothing else matter by Metallica	Absolutely beautiful 🎵 please can you play nothing else matter by Metallica 🙏	73	11	ujzMHLac404	Guzheng: "Spring River Flower Moon Night" 古筝 - 春江花月夜	2710a3333b5c04361f0ea01aef921515	@jmjm1920	2023-01-06T23:30:07Z	0	en	0
One of the best too bad there are too many unnecessary background noises	One of the best too bad there are too many unnecessary background noises	72	13	ujzMHLac404	Guzheng: "Spring River Flower Moon Night" 古筝 - 春江花月夜	4c8cb657520aa84463d4df4057f5b729	@vertikultursg8532	2023-01-03T11:34:48Z	0	en	0
June dee: welcome to ba sing seme: I heard they have cabbage here	June dee: welcome to ba sing seme: I heard they have cabbage here🌿	65	12	ujzMHLac404	Guzheng: "Spring River Flower Moon Night" 古筝 - 春江花月夜	938d149e2026dd6acb885a86d29dccf3	@TheJriggins0071	2023-01-03T03:30:34Z	0	en	0
Im not Chinese so I have no clue how to pronounce it is it literally just gu-zeng or is it different I just wanna know so I don’t make a mistake if I talked about it	Im not Chinese so I have no clue how to pronounce it is it literally just gu-zeng or is it different I just wanna know so I don’t make a mistake if I talked about it	165	32	ujzMHLac404	Guzheng: "Spring River Flower Moon Night" 古筝 - 春江花月夜	719c53bd4b1e087e4787d0846a43b391	@donkcy5176	2023-01-02T11:39:14Z	1	en	0
I hope I can visit China again in the future	I hope I can visit China again in the future	44	8	ujzMHLac404	Guzheng: "Spring River Flower Moon Night" 古筝 - 春江花月夜	aa30e0cf4c21796e438925732a74c0fc	@ghostkitty8988	2023-01-01T06:00:46Z	0	en	1
Xyster Plays Irl (2022, Colorized.)	Xyster Plays Irl (2022, Colorized.)	35	5	ujzMHLac404	Guzheng: "Spring River Flower Moon Night" 古筝 - 春江花月夜	678d29fb79473dad6f9c4e1c81a0f550	@LucaYSUI	2022-12-27T06:48:23Z	0	en	1
I like this music	I like this music	17	3	ujzMHLac404	Guzheng: "Spring River Flower Moon Night" 古筝 - 春江花月夜	df44ba2331f9359d5f169d567ed85305	@kingofrelax1113	2022-12-27T00:52:06Z	0	en	0
What is the name of this instrument?	What is the name of this instrument?	36	7	ujzMHLac404	Guzheng: "Spring River Flower Moon Night" 古筝 - 春江花月夜	a7c7ace8b1591671c2df4293b05d44d8	@wannabegump-2209	2022-12-20T05:45:27Z	1	en	0
is improvisation a part of this tradition?	is improvisation a part of this tradition?	42	6	ujzMHLac404	Guzheng: "Spring River Flower Moon Night" 古筝 - 春江花月夜	59e1e9c95590751581e1e3b6fc9d1d65	@nicholasfevelo3041	2022-12-20T03:52:56Z	1	en	0
Where can I buy this Guzheng instrument like you show on this YouTube video? How much is it?	Where can I buy this Guzheng instrument like you show on this YouTube video? How much is it?	92	17	ujzMHLac404	Guzheng: "Spring River Flower Moon Night" 古筝 - 春江花月夜	0e7c8fc4b0c4b9dad88280c5d81de869	@user-nd5nc7xq9d	2022-12-12T21:19:56Z	1	en	0
Fantastic. Absolutely beautiful. Extremely artistic. Congratulations.	Fantastic. Absolutely beautiful. Extremely artistic. Congratulations. 🙏❤️🙏	69	6	ujzMHLac404	Guzheng: "Spring River Flower Moon Night" 古筝 - 春江花月夜	5aebffd63777feed1754ef747a714a18	@lamontprospect9974	2022-12-02T02:21:13Z	0	en	0
ive been doing a lot of searching for good music to add to my playlist, and it seems to me my tastes have drifted from just guitar bass drums and singer, to like, really beautiful instrumental work. the best part is, its all instrumental, theres no words. sometimes all that needs to be said can be said with music, yet music itself doesnt even need words to paint an entire world to live in.	ive been doing a lot of searching for good music to add to my playlist, and it seems to me my tastes have drifted from just guitar bass drums and singer, to like, really beautiful instrumental work. the best part is, its all instrumental, theres no words. sometimes all that needs to be said can be said with music, yet music itself doesnt even need words to paint an entire world to live in.	392	73	ujzMHLac404	Guzheng: "Spring River Flower Moon Night" 古筝 - 春江花月夜	8f10469ef56f05ec8f7bc6e685e697ae	@Darkopolypse98	2022-11-29T08:46:28Z	0	en	4
This is so good, hen hao!	This is so good, hen hao!	25	6	ujzMHLac404	Guzheng: "Spring River Flower Moon Night" 古筝 - 春江花月夜	64ab0eab9806effa3ed652ebaf836910	@francescoapg	2022-11-23T01:02:15Z	0	en	0
Wow... !!! My best friend, You Great Good... !!! I wish you every day of your development. Best Relaxing +thumb up3!	Wow... !!! My best friend, You Great Good... !!! I wish you every day of your development. Best Relaxing +thumb up3!	116	18	ujzMHLac404	Guzheng: "Spring River Flower Moon Night" 古筝 - 春江花月夜	b4f2d744016c5788a1c57badac203bbf	@koreanature	2022-11-14T07:19:22Z	0	en	0
[truncated: 33,367 more rows]

## Sheet: Bertopic Clustered Comments (Cl
Video Title	Video Id	Video comment	Time	Document	Topic	Name	Representation	KeyBERT	MMR	Representative_Docs	Top_n_words	Probability	Representative_document
[truncated: 32,999 more rows]

[truncated: 1 more sheets: fsQCA Mean Calculation]
